# Supplementary material for: Synthesis of unsymmetrical 2,3,7,8-tetrabromo meso-5,10,11,16-tetraaryl- triphyrin(2.1.1) and its use in the synthesis of sterically crowded 2,3,5,7,8,10,11,16-octaarylated triphyrin(2.1.1)s
Source: Royal Society of Chemistry journal article supplement (doi:10.1039/d3ob01886e), 2024-01-01
Supplement: d3ob01886e1.pdf [file d3ob01886e1.pdf]

## Synthesis of Unsymmetrical 2,3,7,8-Tetrabromo *Meso*-5,10,11,16-Tetraaryl- Triphyrin(2.1.1) and Its Use in the Synthesis of Sterically Crowded 2,3,5,7,8,10,11,16-Octaarylated Triphyrin(2.1.1)s

Akrti Sharma, Gurpreet Kaur and Mangalampalli Ravikanth\*

Department of Chemistry, Indian Institute of Technology Bombay, Powai, Mumbai 400076, India, E-mail: [ravikanth@chem.iitb.ac.in](mailto:ravikanth@chem.iitb.ac.in)

| Sr. no. | Contents                                                                                                                                   | Page no.       |
|---------|--------------------------------------------------------------------------------------------------------------------------------------------|----------------|
| 1.      | <b>General experimental and Computational details.</b>                                                                                     | <b>S2-S3</b>   |
| 2.      | <b>Figures S1-S21:</b> HRMS, $^1\text{H}$ and $^{13}\text{C}\{^1\text{H}\}$ NMR spectra of compounds <b>8-14</b> .                         | <b>S4-S24</b>  |
| 3.      | <b>Figures S23-S25:</b> $^1\text{H}$ - $^1\text{H}$ COSY and NOESY of compound <b>12</b> .                                                 | <b>S25-S27</b> |
| 4.      | <b>Figure S26:</b> X-ray crystal structure of compound <b>8</b> .                                                                          | <b>S28</b>     |
| 5.      | <b>Tables S1-S3:</b> X-ray data for Compound <b>8</b> .                                                                                    | <b>S29-S31</b> |
| 6.      | <b>Figure S27:</b> Absorption spectra of <b>8-14</b> .                                                                                     | <b>S32</b>     |
| 7.      | <b>Figure S28:</b> Electrochemical data for the compounds <b>8-14</b> .                                                                    | <b>S33-34</b>  |
| 8.      | <b>Figure S29:</b> DFT optimized structure of compounds <b>9-11</b> and <b>13-14</b> .                                                     | <b>S34</b>     |
| 9.      | <b>Figure S30:</b> Energy-level diagram (selected FMOs) of compounds <b>9,10</b> and <b>13</b> calculated by B3LYP/6-31G (d, p) method.    | <b>S35</b>     |
| 10.     | <b>Figure S31:</b> Calculated excitations and experimental absorption spectrum for compounds.                                              | <b>S36</b>     |
| 11.     | <b>Table S4-S10:</b> Selected TD-DFT calculated oscillator strengths and compositions of the major electronic transitions of <b>8-14</b> . | <b>S37-S58</b> |
| 12.     | <b>Table S11-S16:</b> Cartesian coordinate for the optimized geometry of compounds <b>8-14</b> .                                           | <b>S58-S72</b> |
| 13.     | <b>References</b>                                                                                                                          | <b>S72</b>     |

## General Experimental Section:

**Materials and Methods:** Reagent-grade chemicals were employed during synthesis. For column chromatography purification purpose, silica (60–120 and 100–200 mesh) and basic alumina was used. Bruker 400 and 500 MHz instruments assisted us in recording 1D, 2D and  $^{13}\text{C}$  using  $\text{CDCl}_3$  as solvent. 100.06 and 125.77 MHz is the frequency for the  $^{13}\text{C}$  nucleus for 400 and 500 MHz respectively. For  $^1\text{H}$  and  $^{13}\text{C}\{^1\text{H}\}$  NMR the internal standard used was Tetramethylsilane [ $\text{Si}(\text{CH}_3)_4$ ]. Structural assignments were made with additional information from COSY and NOESY experiments for compound **12**. Carry series UV–vis–NIR and UV 3600 Shimadzu spectrophotometer helped us to record the absorption spectra of the compounds. For UV–Vis stock solution ( $10^{-5}$  M) was prepared by using a HPLC grade chloroform solvent. Cyclic voltammetry (CV) studies were carried out with BASi C3 Cell Stand electrochemical system (Manufacturer: Bioanalytical Systems, Inc.) utilizing the three electrode configuration consisting of a glassy carbon (working electrode), platinum wire (auxiliary electrode) and saturated calomel as reference electrode (the electrode is composed of  $\text{Hg}/\text{Hg}_2\text{Cl}_2/\text{Saturated KCl}$  solution). The experiments were done in dry dichloromethane using 0.1 M tetrabutylammonium perchlorate as supporting electrolyte. The initial and final potential was at 0 V, first switching potential at -2.0 V and second switching potential at 2.0 V. Glassy carbon-disk working electrodes (3 mm diameter, part # CHI 104) were purchased from CH Instruments, HRMS was recorded on a Bruker maXis Impact and LC-MS Q-ToF micro mass spectrometer using positive mode ESI methods for acetonitrile/methanol solutions.

**X-ray Crystal Structure Analysis:** Single crystal X-ray structure analysis was performed on on a Rigaku Saturn 724 diffractometer that was equipped with a low-temperature attachment. Data were collected at 100 K using graphite-monochromated Mo  $K\alpha$  radiation ( $\lambda = 0.71073$  Å) by the  $\omega$ -scan technique. The data were reduced by using Crystal Clear-SM Expert 2.1

b24 software. The structures were solved by direct methods and refined by least-squares against F2 utilizing the software packages SHELXL-97,<sup>1</sup> SIR-92,<sup>2</sup> and WINGX. All nonhydrogen atoms were refined anisotropically. The X-ray data for the compound **8** were collected on a Bruker Kappa CCD diffractometer equipped with a graphite monochromated Mo K $\alpha$  radiation source at 200 K using the  $\theta$ - $2\theta$  scan mode. An empirical absorption correction by multi scans was applied and all of the non-hydrogen atoms were refined with anisotropic displacement factors. The hydrogen atoms were placed in ideal positions and fixed with relative isotropic displacement parameters. The single crystals of compound **8** were obtained by slow diffusion of n-hexane into chloroform solution over a period of 5-6 days. CCDC no. 2307843 contains the supplementary crystallographic data for this paper.

**Computational details:** For all the calculations Gaussian 09 program package was used.<sup>3</sup> The density functional theory (DFT)<sup>4</sup> method, hybrid functional B3LYP in conjunction with basis set 6-31G(d,p)<sup>5</sup> helped to optimize the structure of compounds **9-14** in the ground ( $S_0$ ) states. To obtain the oscillator strengths, identical basis and functional hybrid set were used whereas the vertical excitation energies were obtained with the help of TD-DFT techniques for  $S_0 \rightarrow S_n$  transitions.<sup>6</sup> Under the Polarizable Continuum Model (PCM) in the toluene media all the computations were done using the Self-Consistent Reaction Field (SCRF). The electronic absorption spectra as well as the oscillator strengths were thoroughly examined using TD-DFT with PCM model<sup>7</sup> on the basis of the optimized structures in the  $S_0$  state.

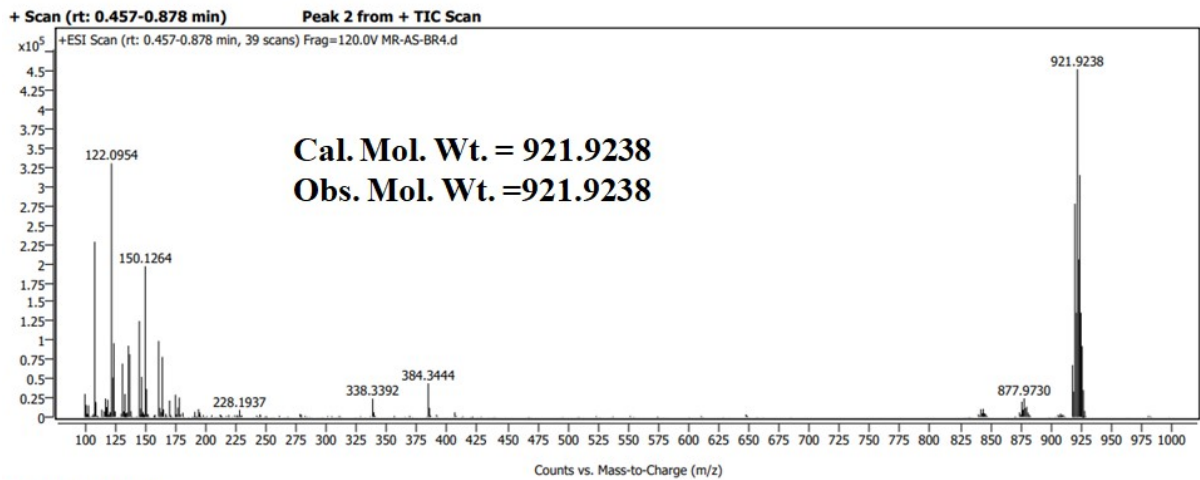

**Compound Details**

**Cpd. 1: C44 H31 Br4 N3**

| Formula        | m/z      | Observed M/Z     | Difference Da     | Difference PPM    | Score |
|----------------|----------|------------------|-------------------|-------------------|-------|
| C44 H31 Br4 N3 | 921.9238 | 921.923800387518 | -5.39687243269782 | -5.88583750264329 | 78.92 |

**Compound Spectra (Zoomed)**

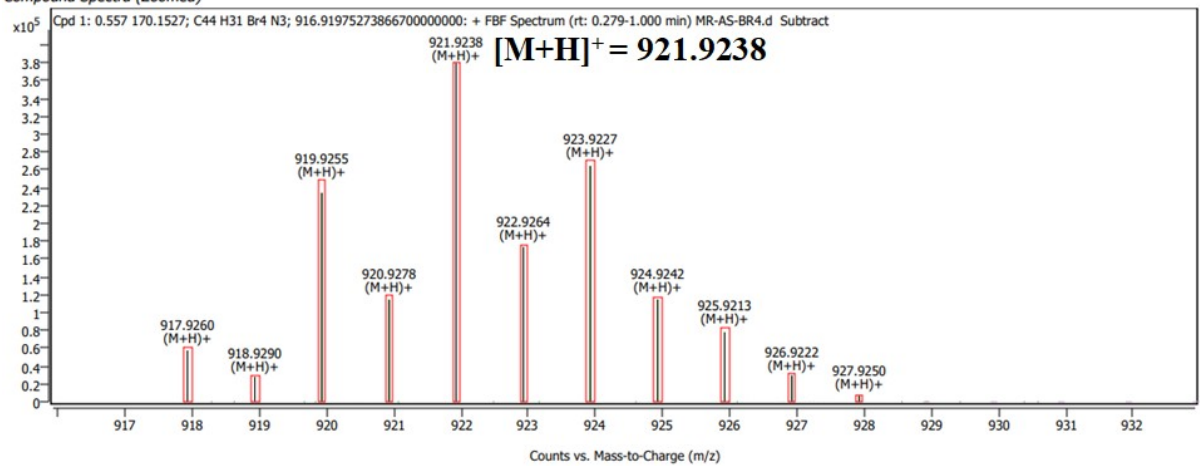

**Figure S1.** HR mass spectrum of the compound **8**.

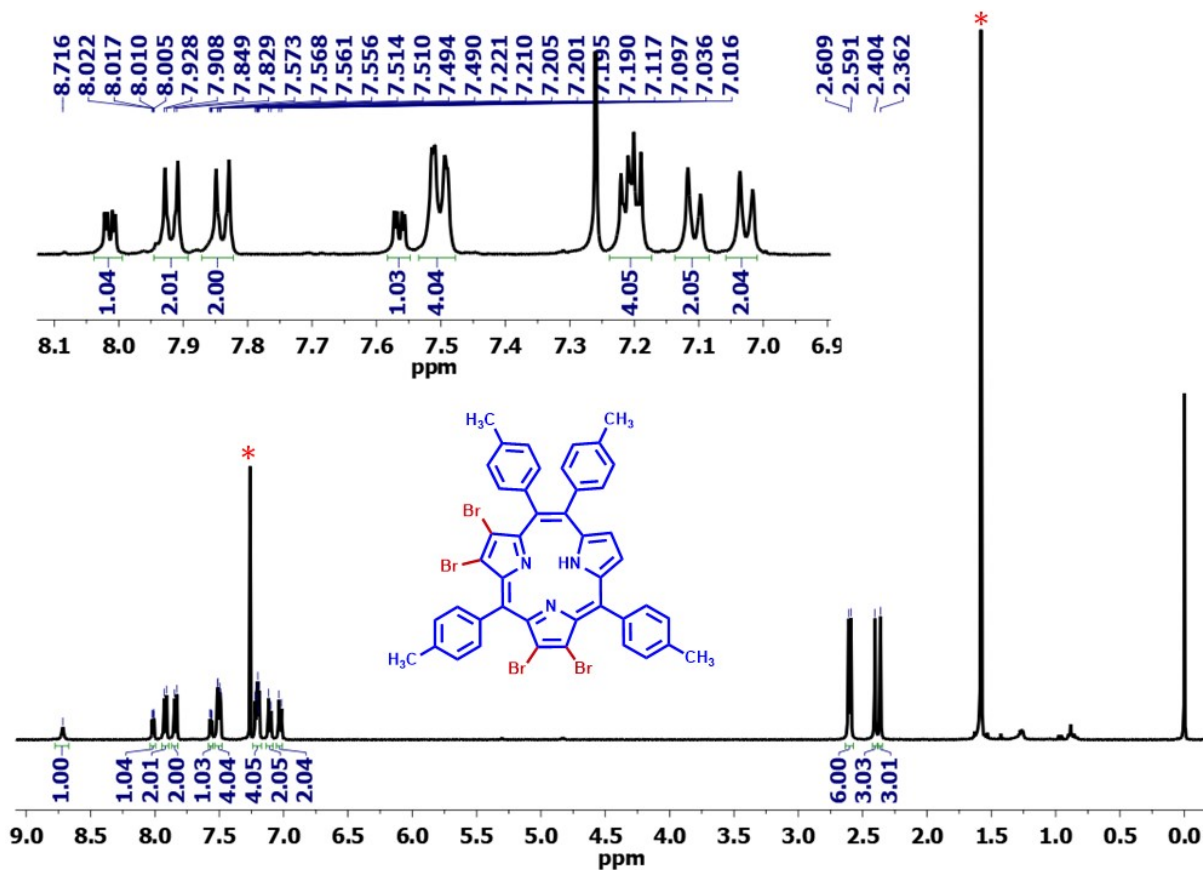

**Figure S2.**  $^1\text{H}$  NMR spectrum of the compound **8** recorded in  $\text{CDCl}_3$  on 400 MHz FT-NMR spectrometer. Note: Peaks marked with asterisk (\*) are due to residual solvents.

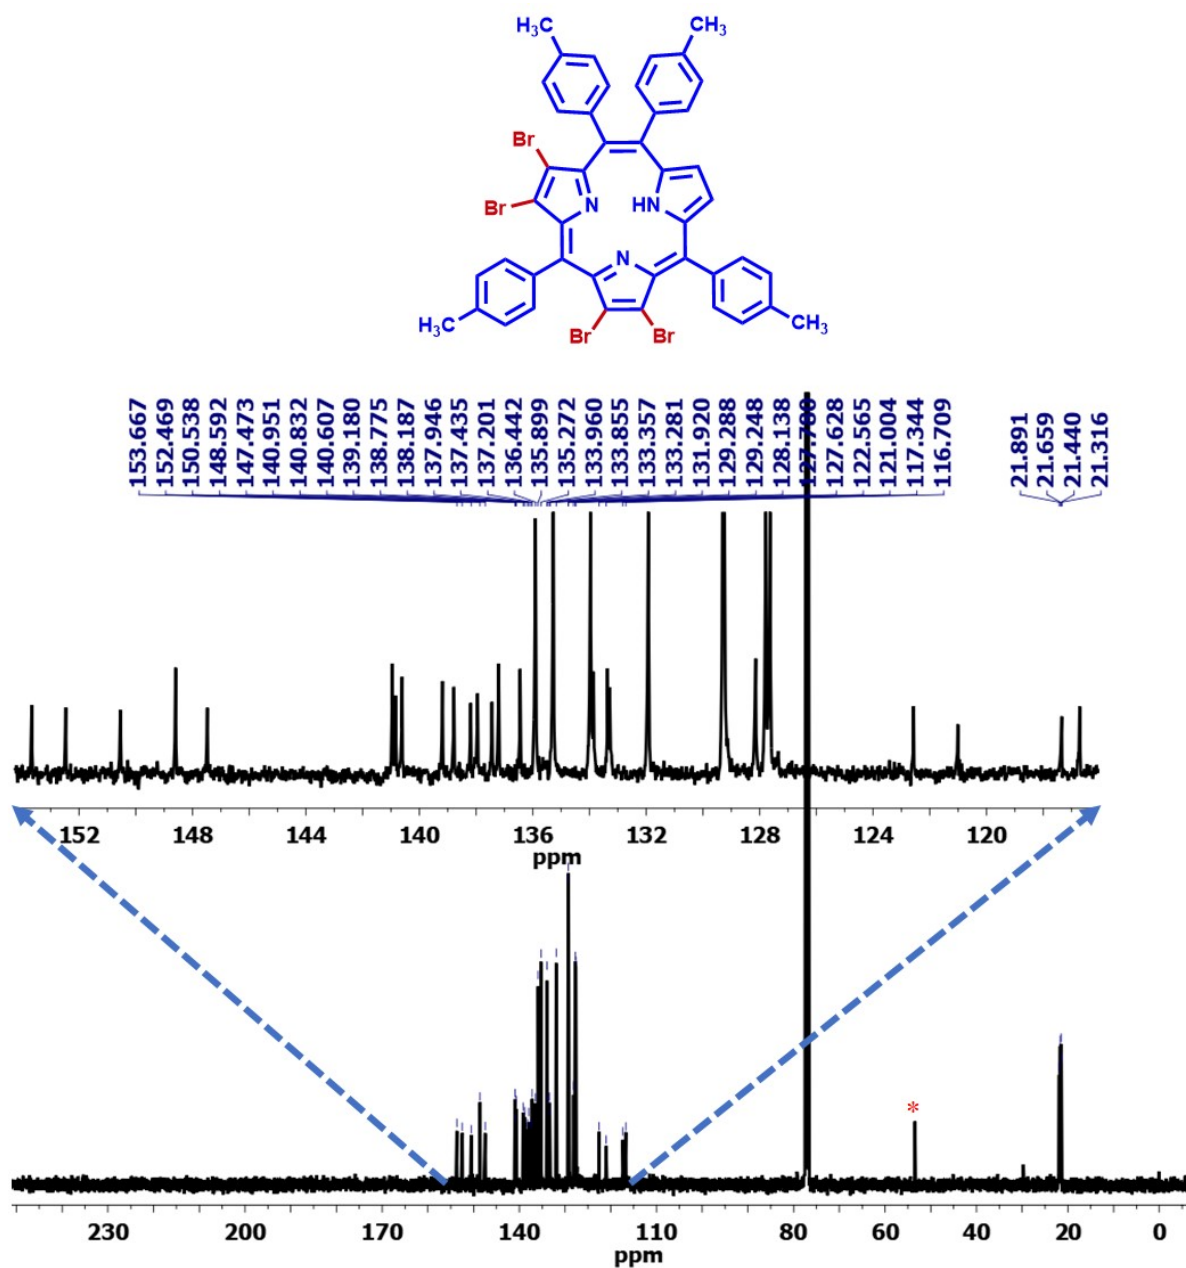

**Figure S3.**  $^{13}\text{C}\{^1\text{H}\}$  NMR spectrum of the compound **8** recorded in  $\text{CDCl}_3$  on 101 MHz FT-NMR spectrometer. Note: Peaks marked with asterisk (\*) are due to residual solvents.

### Sample Spectra

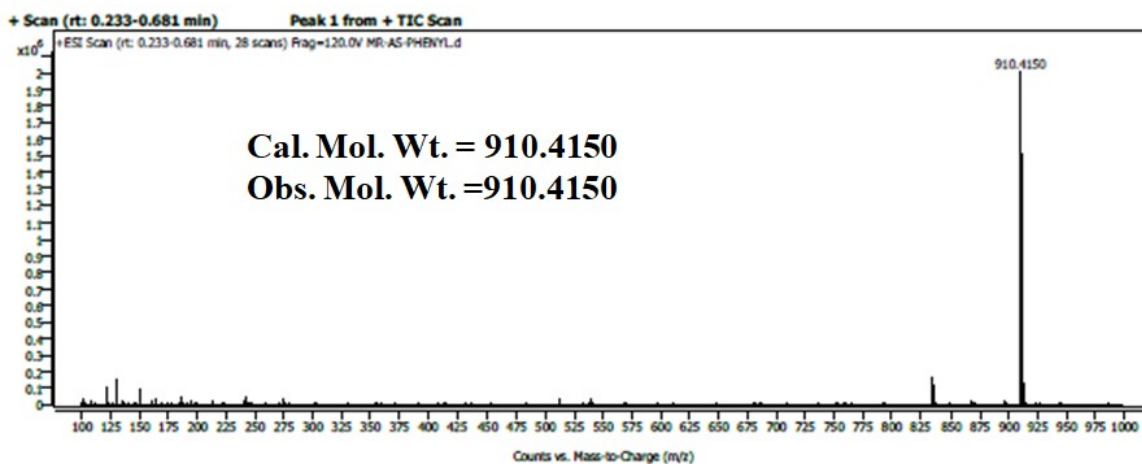

### Compound Details

Cpd. 1: C68 H51 N3

| Formula    | m/z      | Observed M/Z     | Difference Da     | Difference PPM     | Score |
|------------|----------|------------------|-------------------|--------------------|-------|
| C68 H51 N3 | 910.4150 | 910.415028639391 | -0.47029387440034 | -0.517142712573603 | 99.41 |

### Compound Spectra (Zoomed)

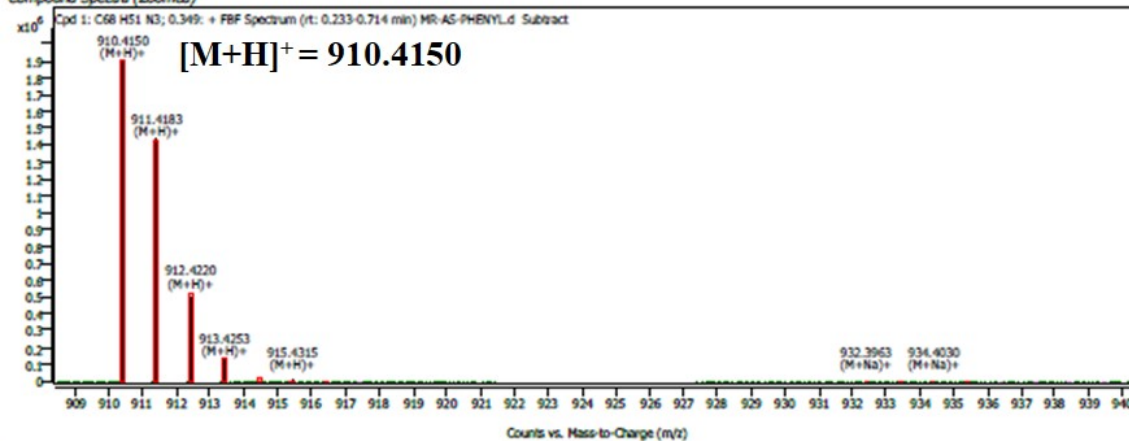

MassHunter Qual 10.0  
(End of Report)

Figure S4. HR mass spectrum of the compound 9.

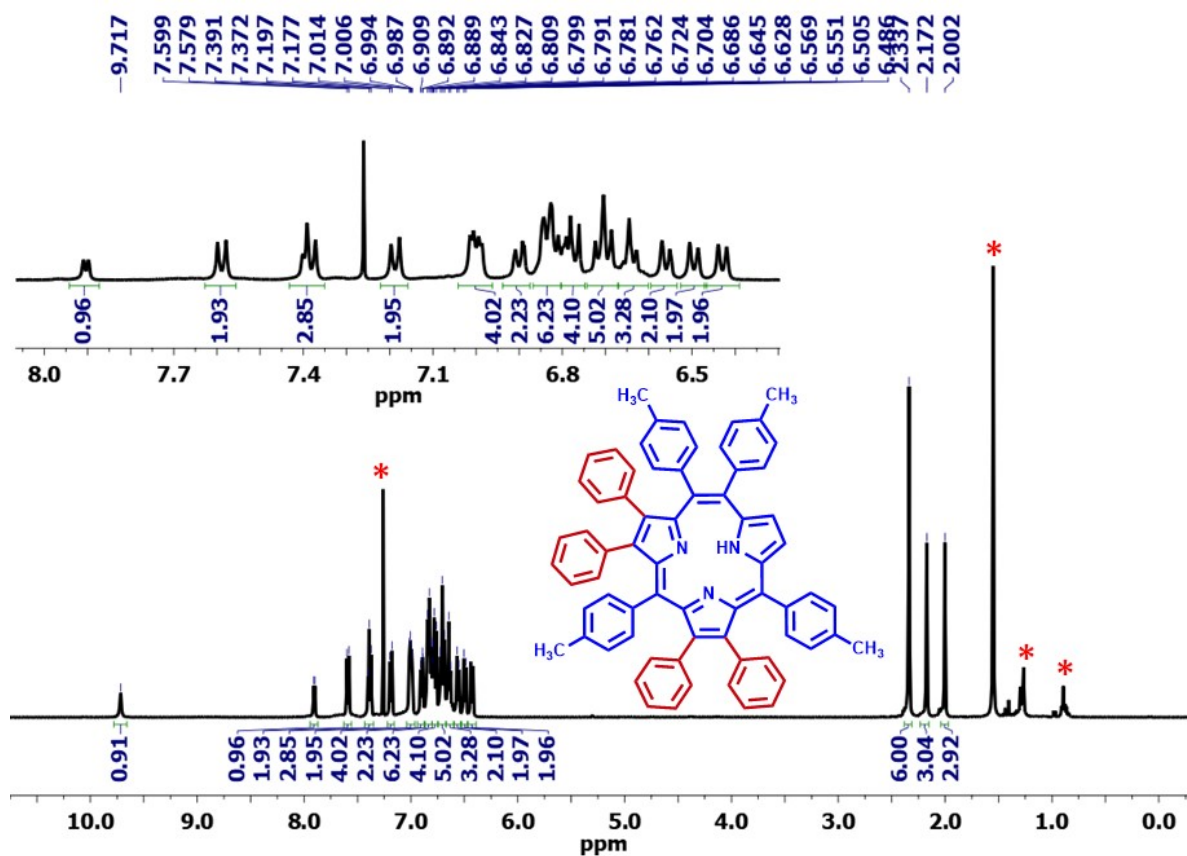

**Figure S5.** <sup>1</sup>H NMR spectrum of the compound **9** recorded in CDCl<sub>3</sub> on 400 MHz FT-NMR spectrometer. Note: Peaks marked with asterisk (\*) are due to residual solvents.



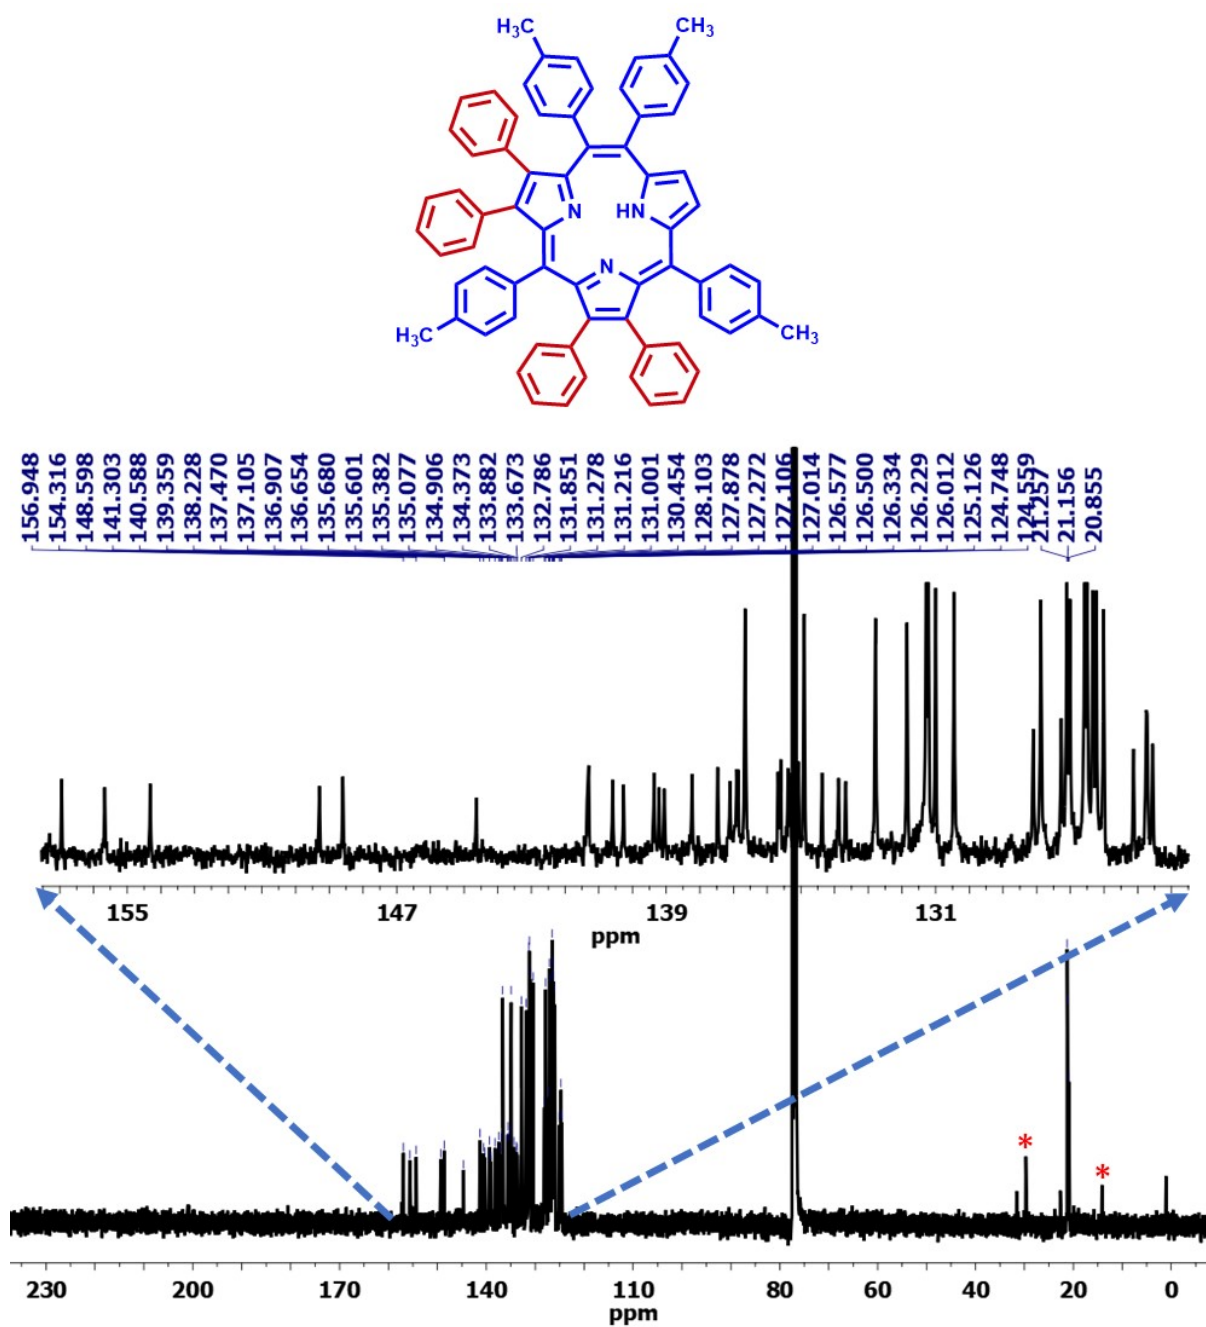

**Figure S6.**  $^{13}\text{C}\{^1\text{H}\}$  NMR spectrum of the compound 9 recorded in  $\text{CDCl}_3$  on 101 MHz FT-NMR spectrometer. Note: Peaks marked with asterisk (\*) are due to residual solvents.

### Sample Spectra

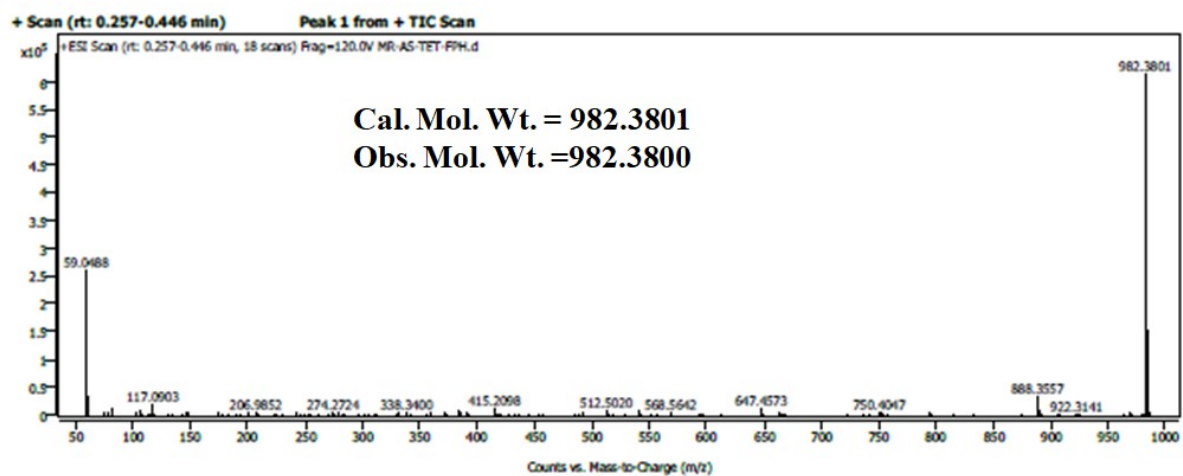

### Compound Details

Cpd. 1: C68 H47 F4 N3

| Formula       | m/z      | Observed M/Z     | Difference Da    | Difference PPM   | Score |
|---------------|----------|------------------|------------------|------------------|-------|
| C68 H47 F4 N3 | 982.3801 | 982.380058434567 | 2.18731895859037 | 2.22884090205733 | 94.48 |

Compound Spectra (Zoomed)

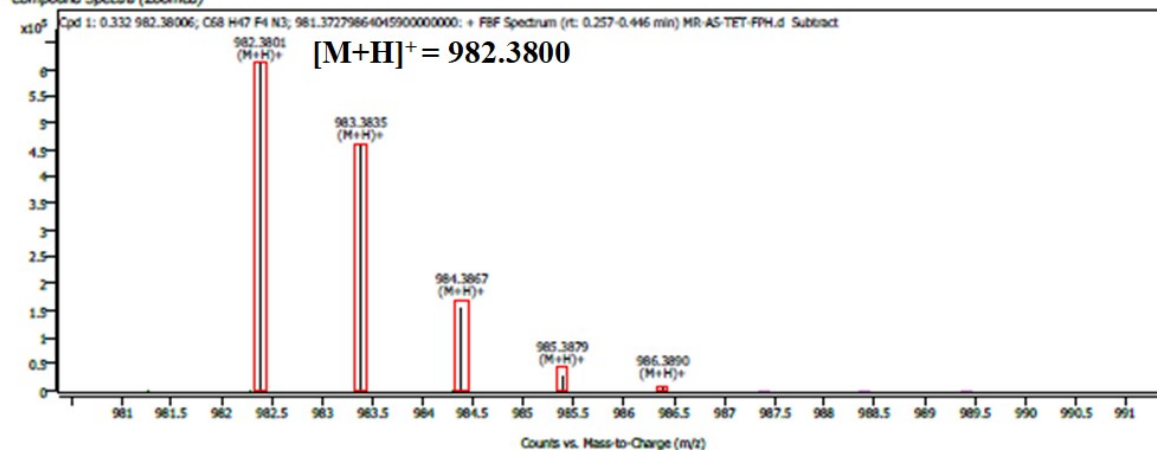

MassHunter Qual 10.0  
(End of Report)

Figure S7. HR mass spectrum of the compound 10.

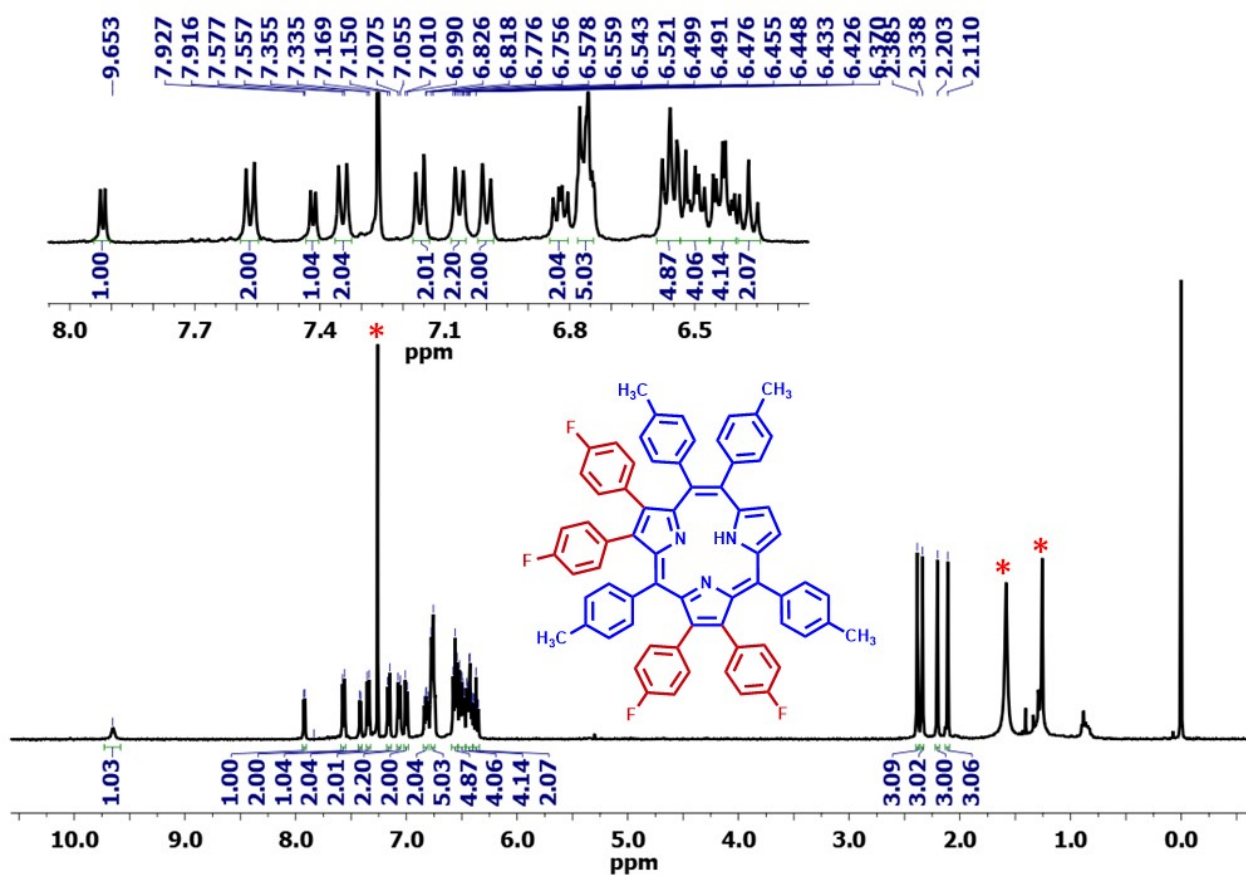

**Figure S8.**  $^1\text{H}$  NMR spectrum of the compound **10** recorded in  $\text{CDCl}_3$  on 400 MHz FT-NMR spectrometer. Note: Peaks marked with asterisk (\*) are due to residual solvents.

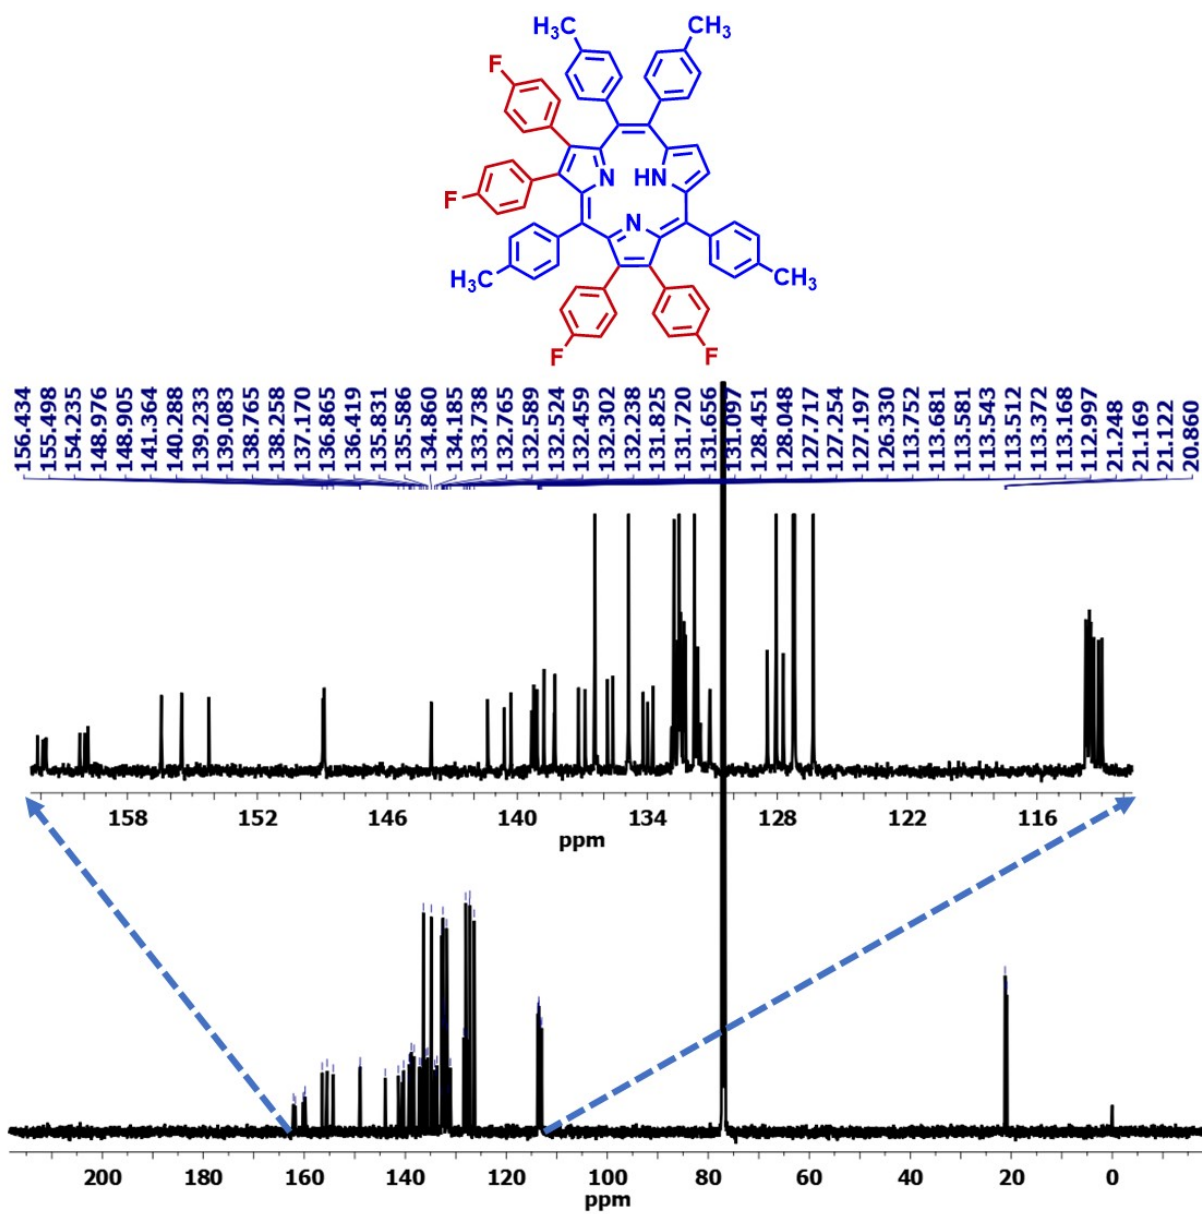

**Figure S9.**  $^{13}\text{C}\{^1\text{H}\}$  NMR spectrum of the compound **10** recorded in  $\text{CDCl}_3$  on 101 MHz FT-NMR spectrometer.

Sample Spectra

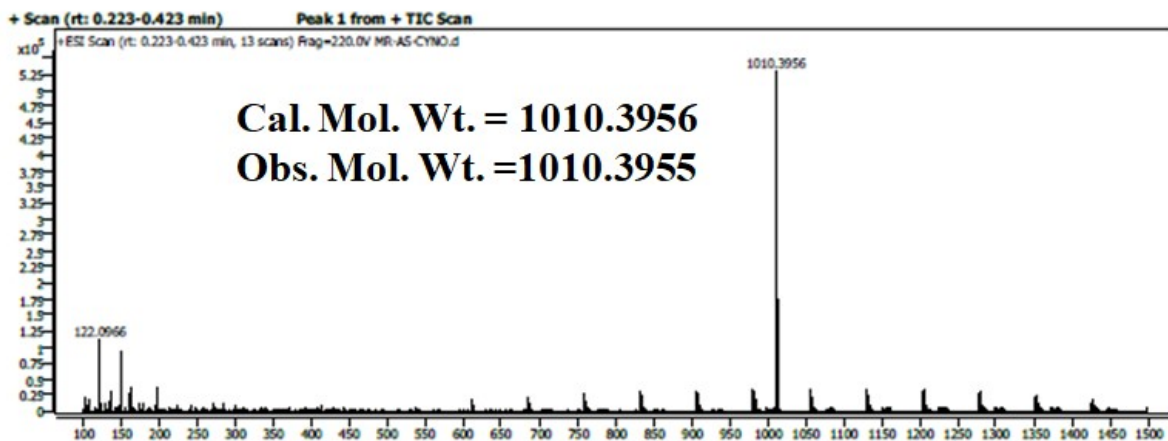

Compound Details

Cpd. 1: C72 H47 N7

| Formula    | m/z       | Observed M/Z     | Difference Da      | Difference PPM     | Score |
|------------|-----------|------------------|--------------------|--------------------|-------|
| C72 H47 N7 | 1010.3956 | 1010.39557928085 | -0.934016933911153 | -0.925328749723399 | 99.15 |

Compound Spectra (Zoomed)

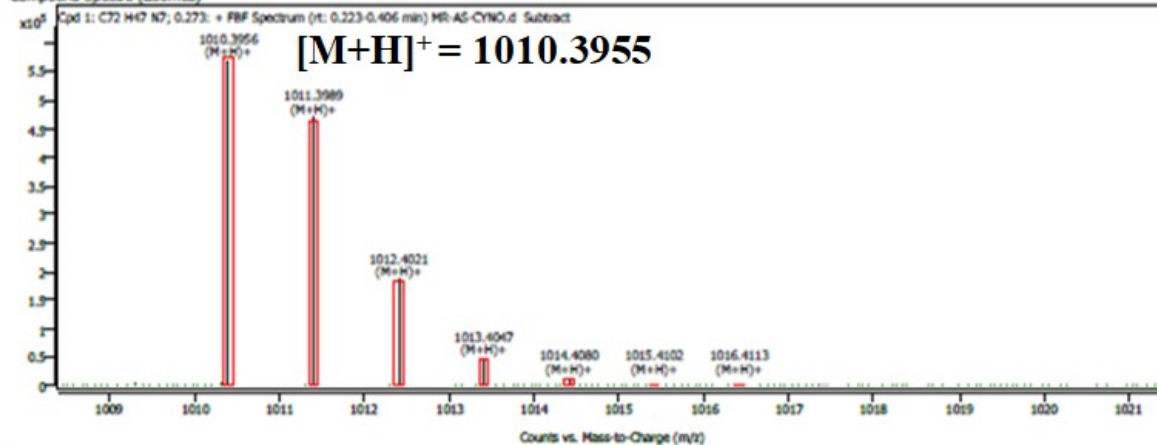

MassHunter Qual 10.0  
 (End of Report)

Figure S10. HR mass spectrum of the compound 11.

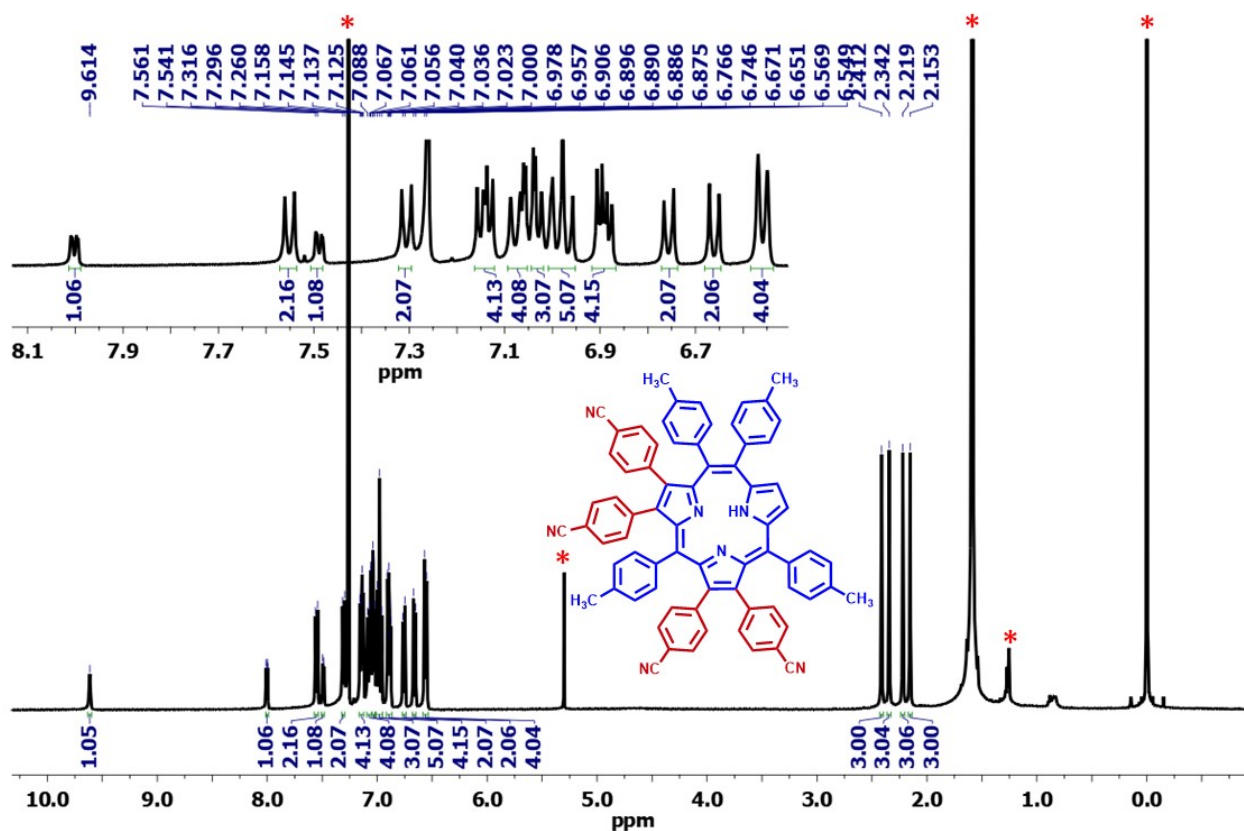

**Figure S11.**  $^1\text{H}$  NMR spectrum of the compound **11** recorded in  $\text{CDCl}_3$  on 400 MHz FT-NMR spectrometer. Note: Peaks marked with asterisk (\*) are due to residual solvents.

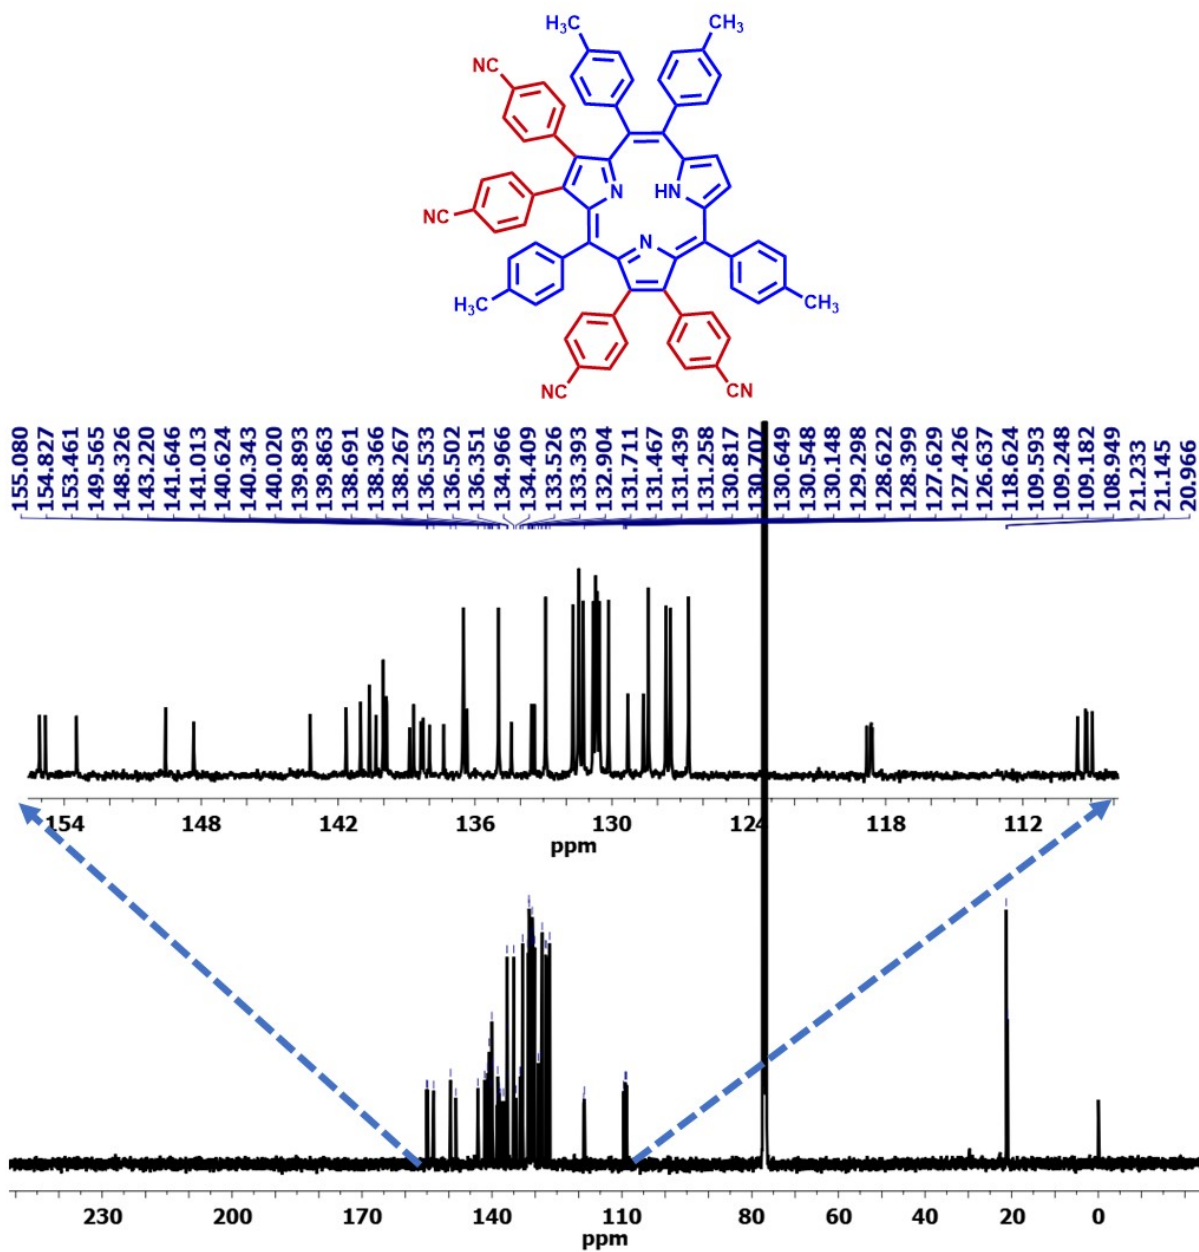

**Figure S12.** <sup>13</sup>C{<sup>1</sup>H} NMR spectrum of the compound **11** recorded in CDCl<sub>3</sub> on 101 MHz FT-NMR spectrometer.

### Sample Spectra

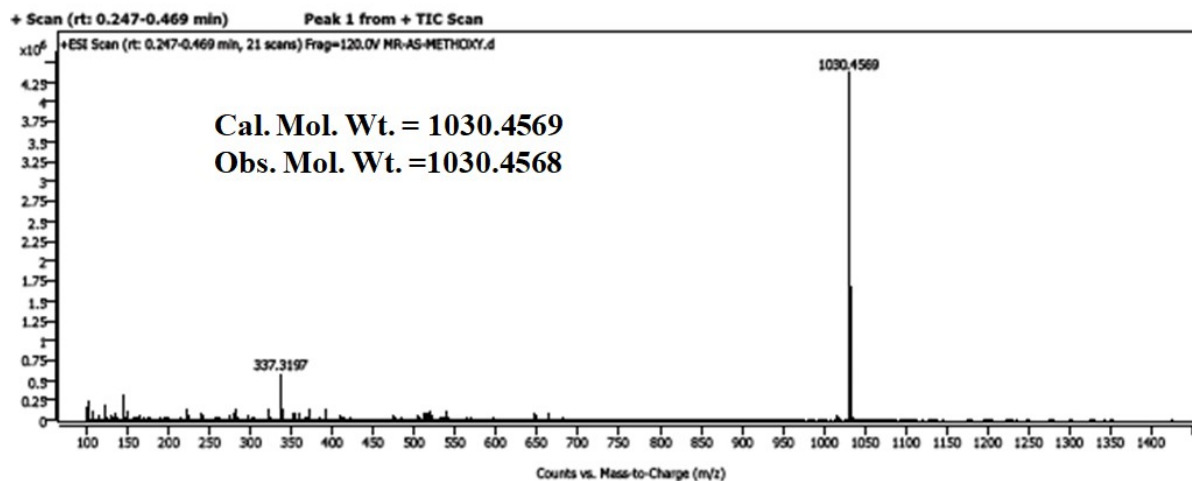

### Compound Details

Cpd. 1: C72 H59 N3 O4

| Formula       | m/z       | Observed M/Z     | Difference Da     | Difference PPM    | Score |
|---------------|-----------|------------------|-------------------|-------------------|-------|
| C72 H59 N3 O4 | 1030.4569 | 1030.45685586312 | -1.63357659721441 | -1.58684318103681 | 95.66 |

### Compound Spectra (Zoomed)

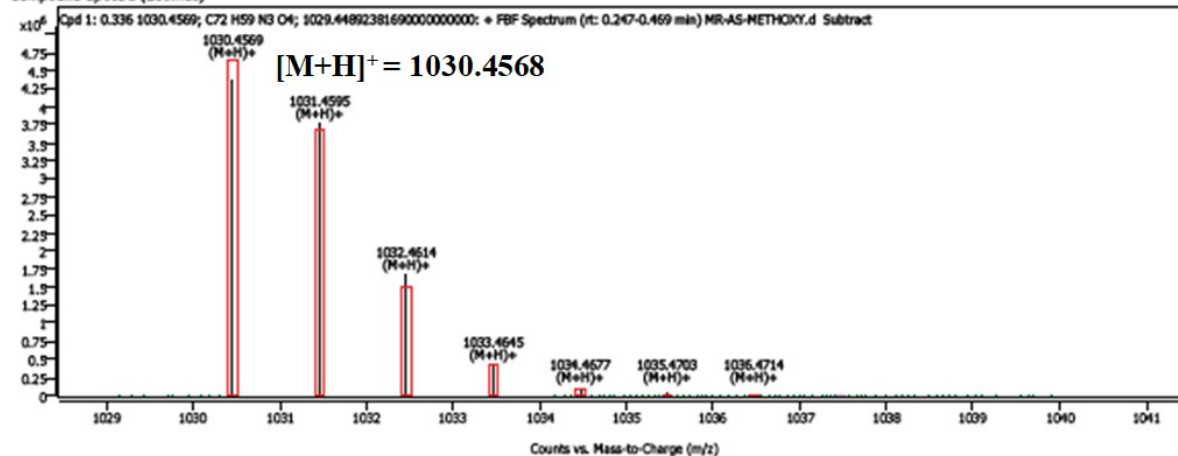

Figure S13. HR mass spectrum of the compound 12.



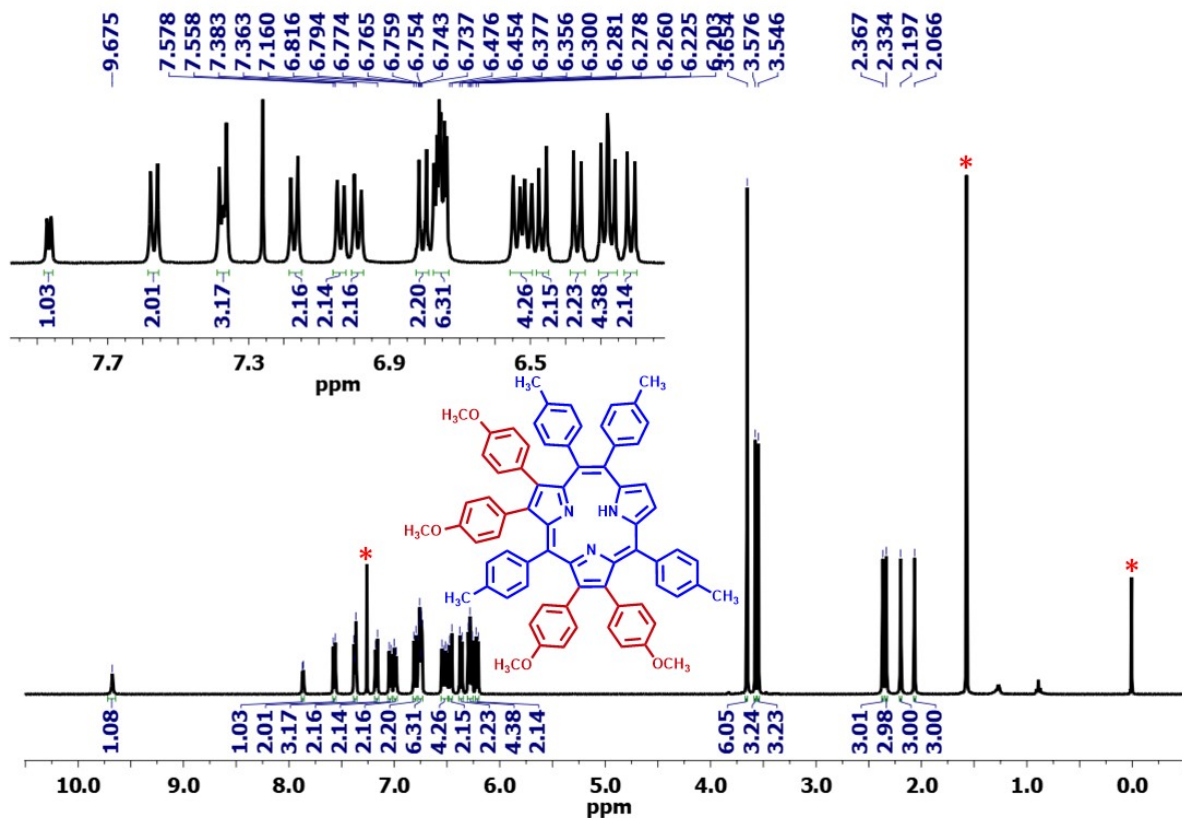

**Figure S14.** <sup>1</sup>H NMR spectrum of the compound **12** recorded in CDCl<sub>3</sub> on 400 MHz FT-NMR spectrometer. Note: Peaks marked with asterisk (\*) are due to residual solvents.

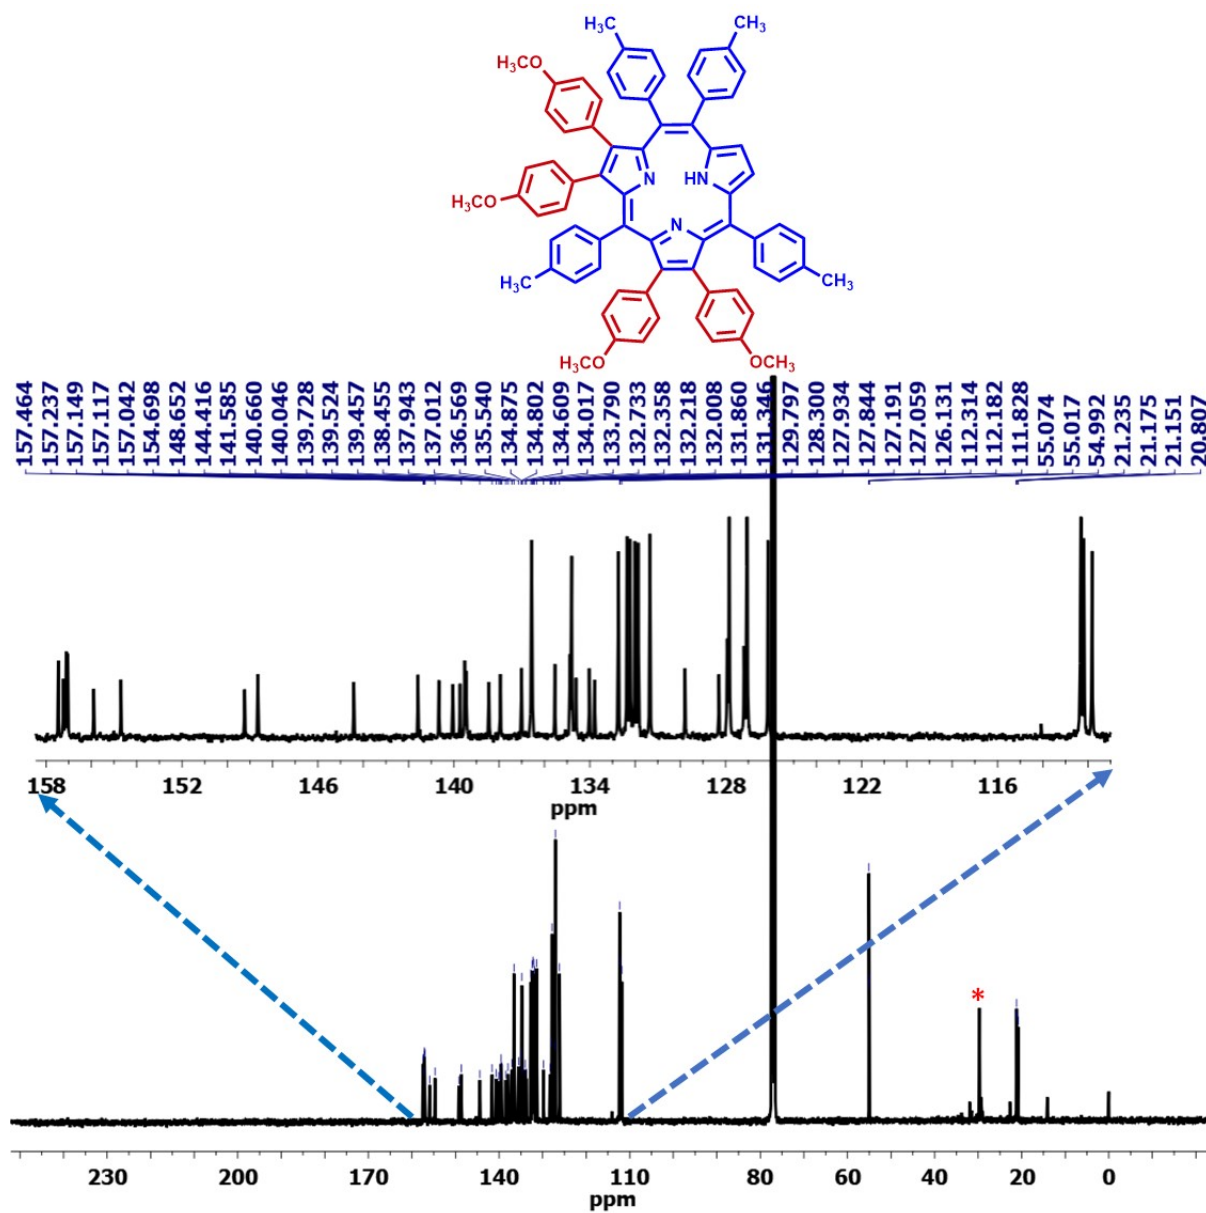

**Figure S15.** <sup>13</sup>C{<sup>1</sup>H} NMR spectrum of the compound **12** recorded in CDCl<sub>3</sub> on 101 MHz FT-NMR spectrometer. Note: Peaks marked with asterisk (\*) are due to residual solvents.

Sample Spectra

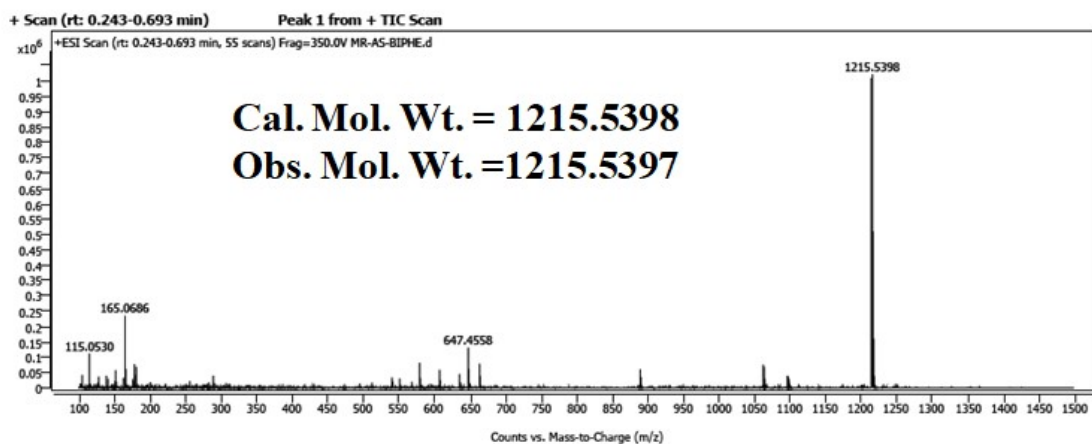

Compound Details

Cpd. 1: C92 H67 N3

| Formula    | m/z       | Observed M/Z    | Difference Da     | Difference PPM    | Score |
|------------|-----------|-----------------|-------------------|-------------------|-------|
| C92 H67 N3 | 1215.5398 | 1215.5397900746 | -4.28571892348373 | -3.53160331087031 | 89.62 |

Compound Spectra (Zoomed)

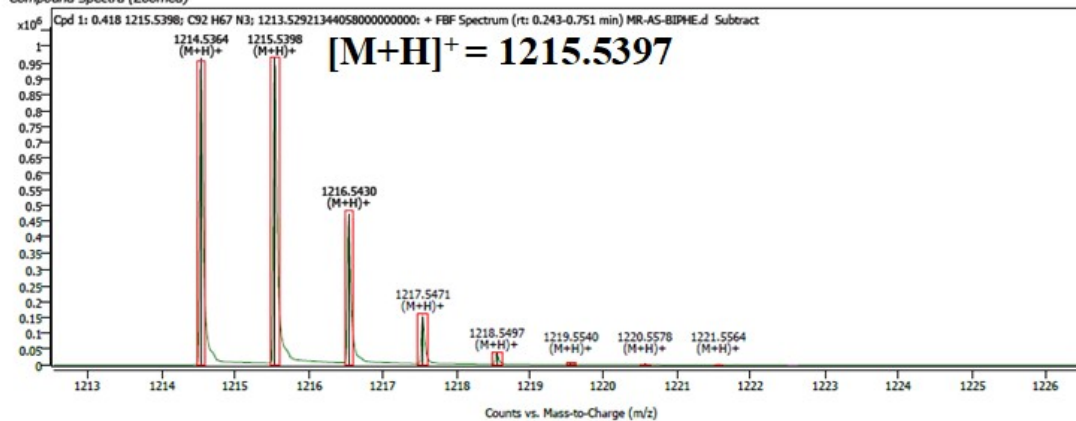

Figure S16. HR mass spectrum of the compound 13.

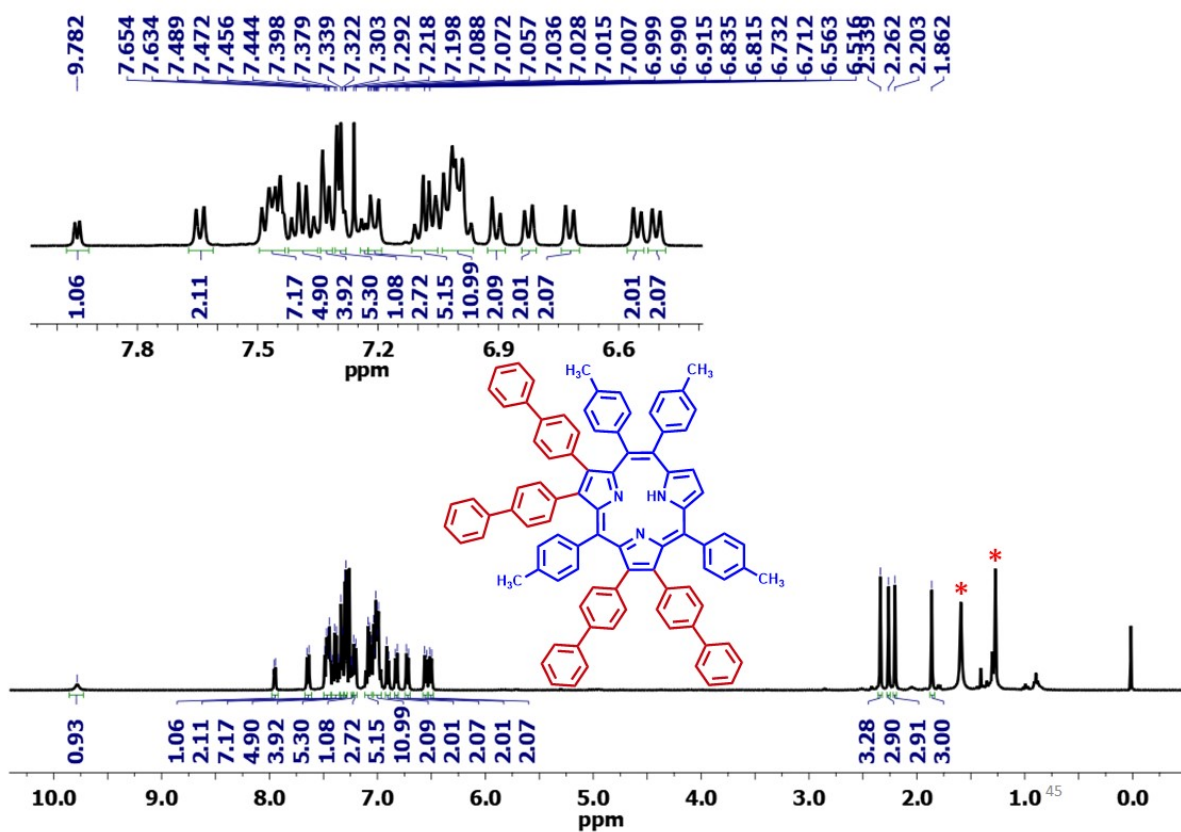

**Figure S17.** <sup>1</sup>H NMR spectrum of the compound **13** recorded in CDCl<sub>3</sub> on 400 MHz FT-NMR spectrometer. Note: Peaks marked with asterisk (\*) are due to residual solvents.

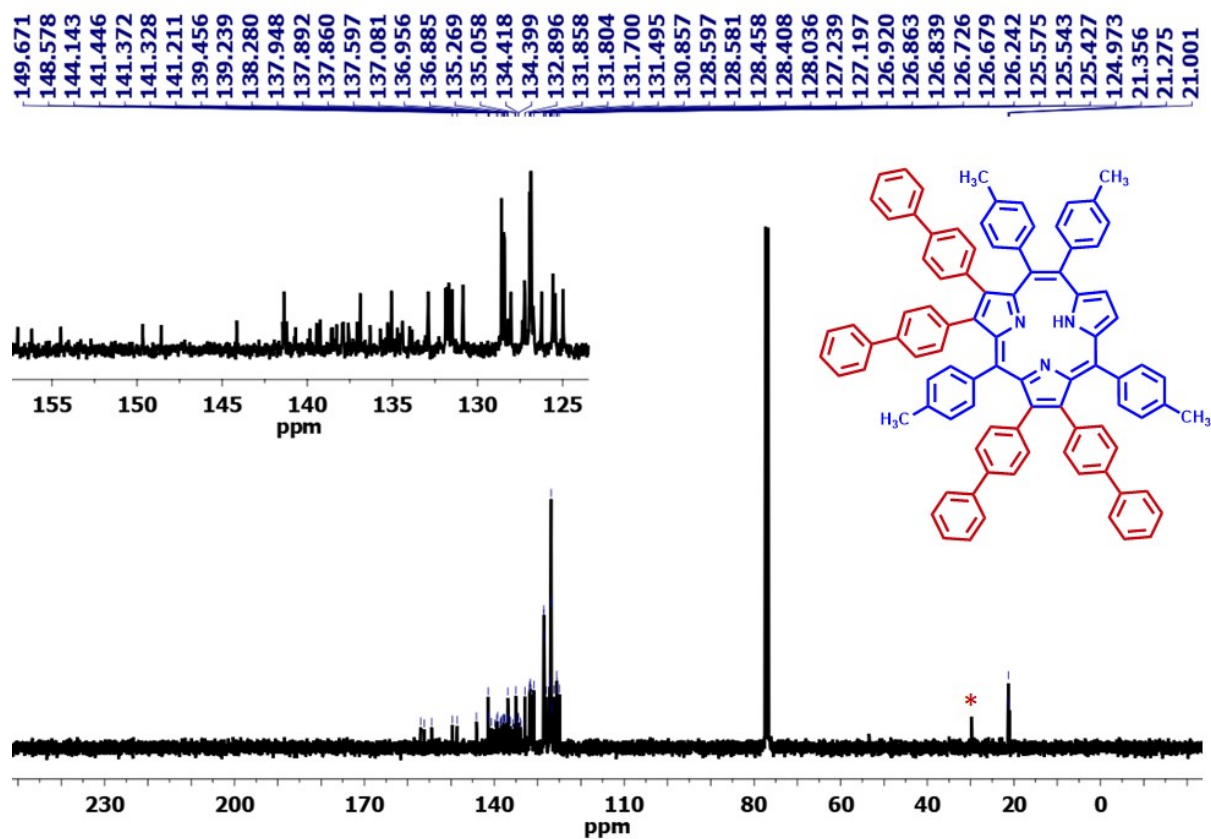

**Figure S18.**  $^{13}\text{C}\{^1\text{H}\}$  NMR spectrum of the compound **13** recorded in  $\text{CDCl}_3$  on 101 MHz FT-NMR spectrometer. Note: Peaks marked with asterisk (\*) are due to residual solvents.

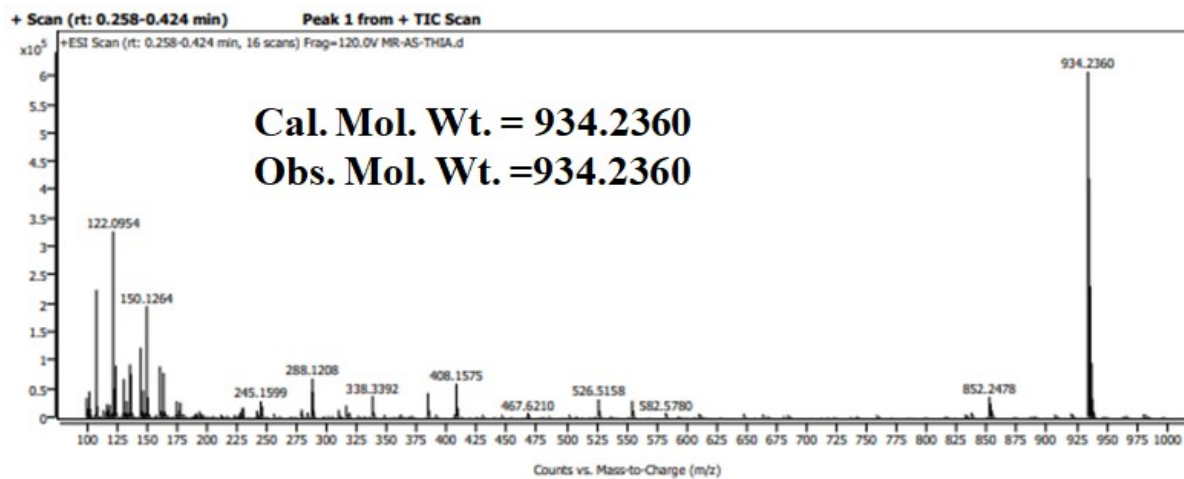

#### Compound Details

Cpd. 1: C60 H43 N3 S4

| Formula       | m/z      | Observed M/Z     | Difference Da     | Difference PPM    | Score |
|---------------|----------|------------------|-------------------|-------------------|-------|
| C60 H43 N3 S4 | 934.2360 | 934.236029709701 | -5.00926714323668 | -5.36764331725698 | 80.56 |

#### Compound Spectra (Zoomed)

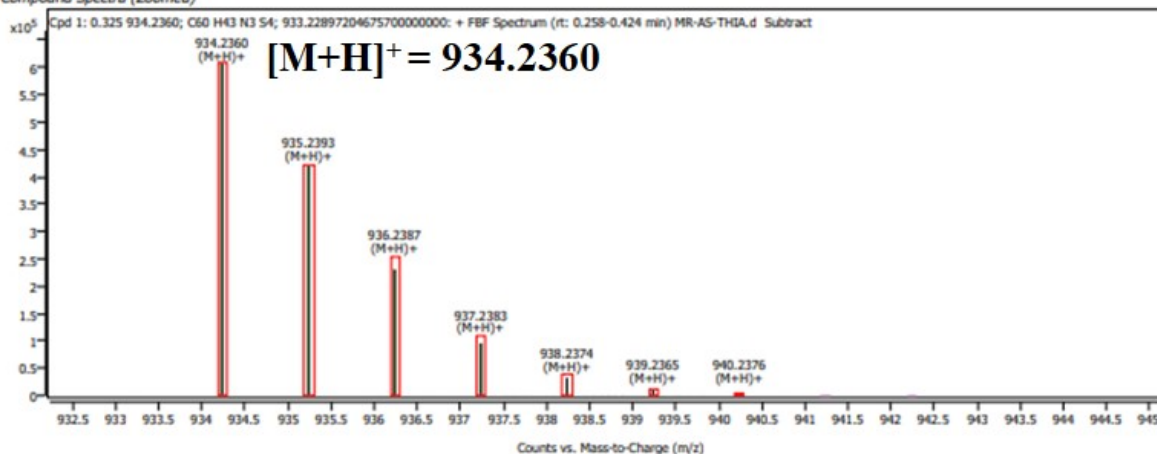

Figure S19. HR mass spectrum of the compound 14.

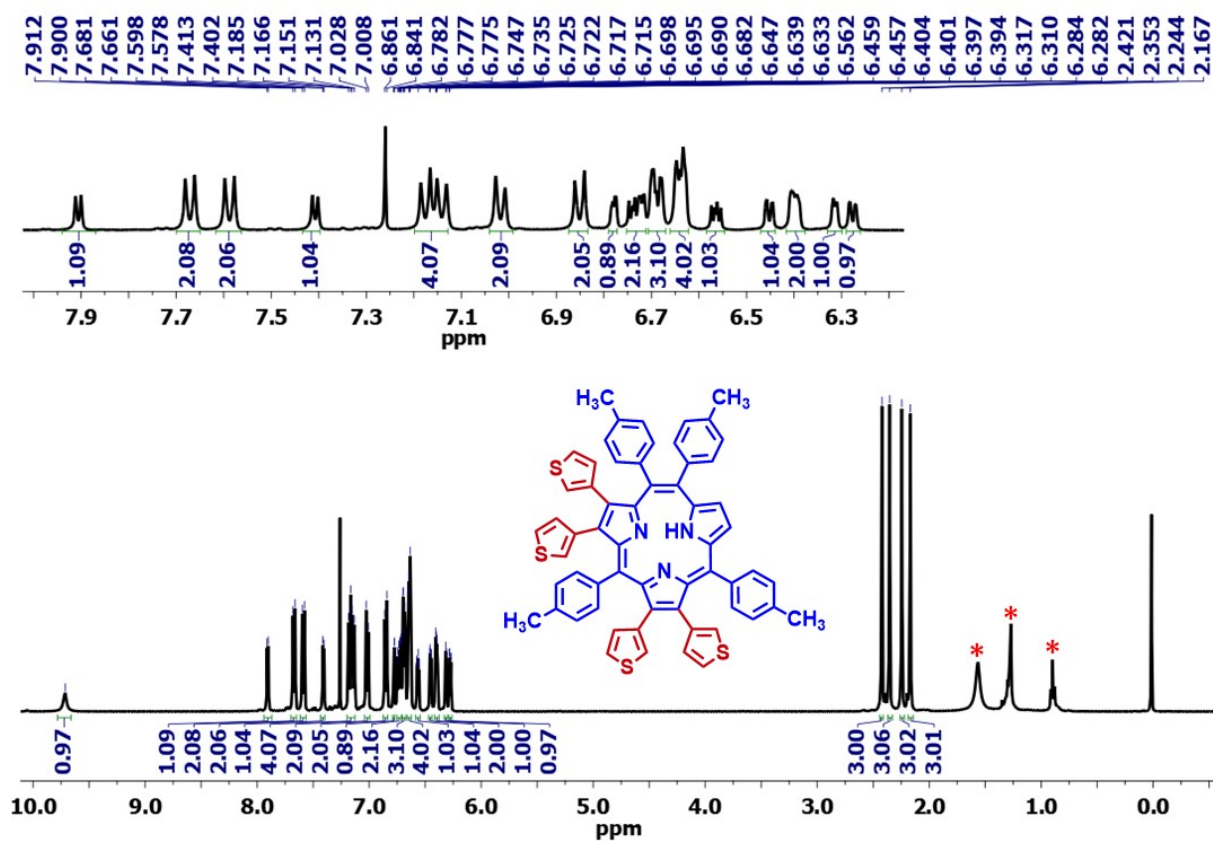

**Figure S20.**  $^1\text{H}$  NMR spectrum of the compound **14** recorded in  $\text{CDCl}_3$  on 400 MHz FT-NMR spectrometer. Note: Peaks marked with asterisk (\*) are due to residual solvents.

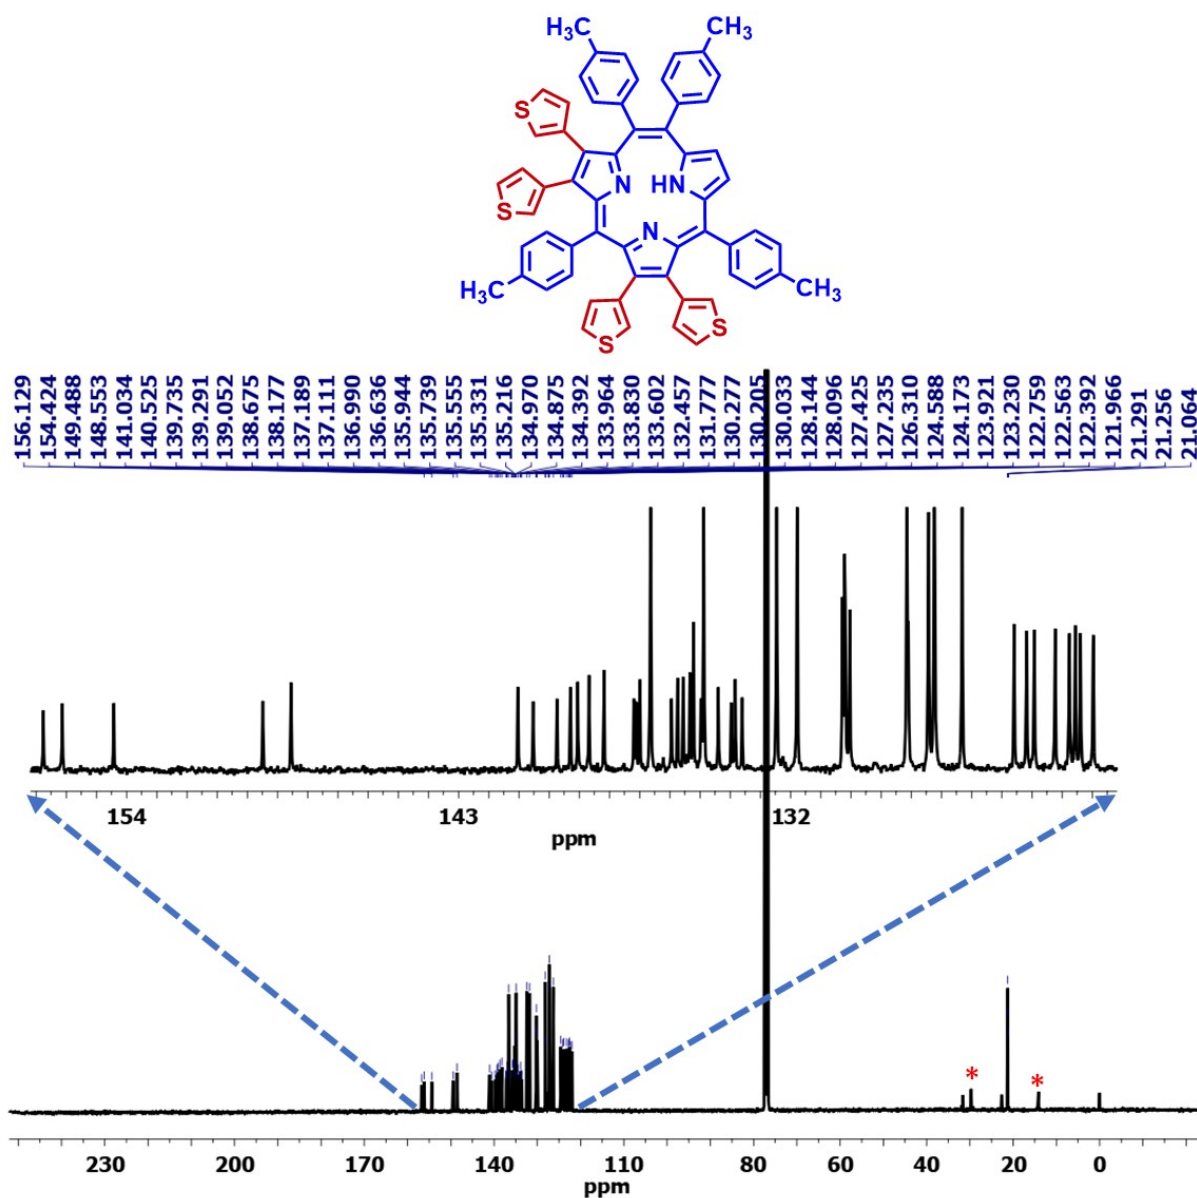

**Figure S21.** <sup>13</sup>C{<sup>1</sup>H} NMR spectrum of the compound **14** recorded in CDCl<sub>3</sub> on 101 MHz FT-NMR spectrometer. Note: Peaks marked with asterisk (\*) are due to residual solvents.



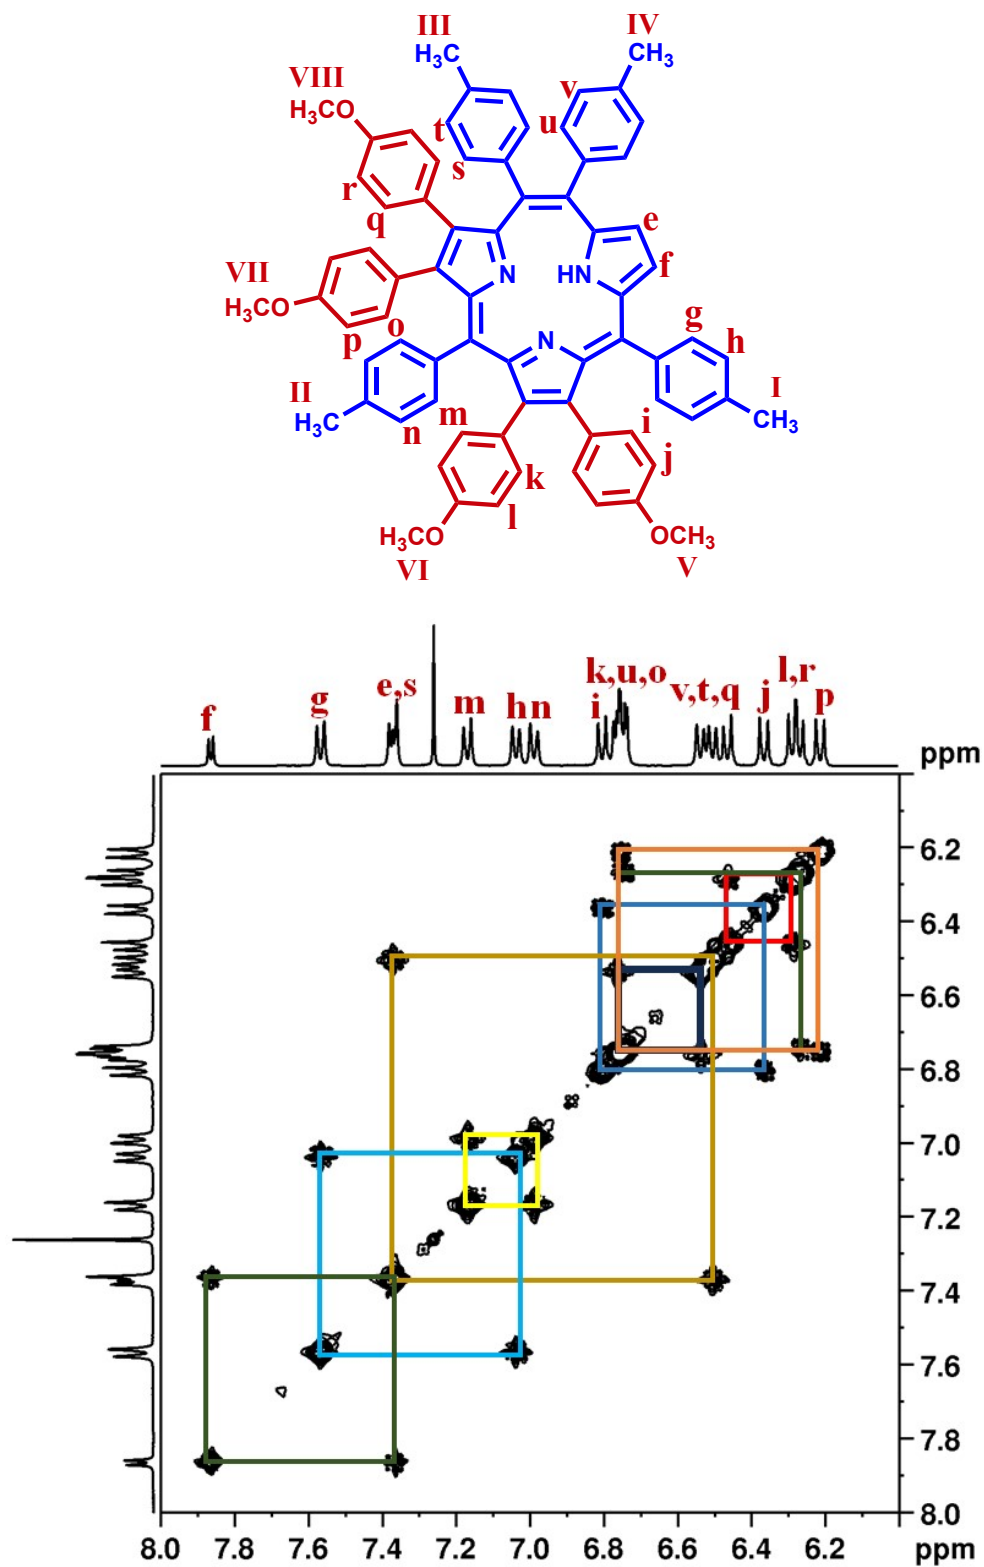

**Figure S23.** Partial <sup>1</sup>H-<sup>1</sup>H COSY spectrum of compound **12** recorded in CDCl<sub>3</sub> at room temperature on 400 MHz instrument.

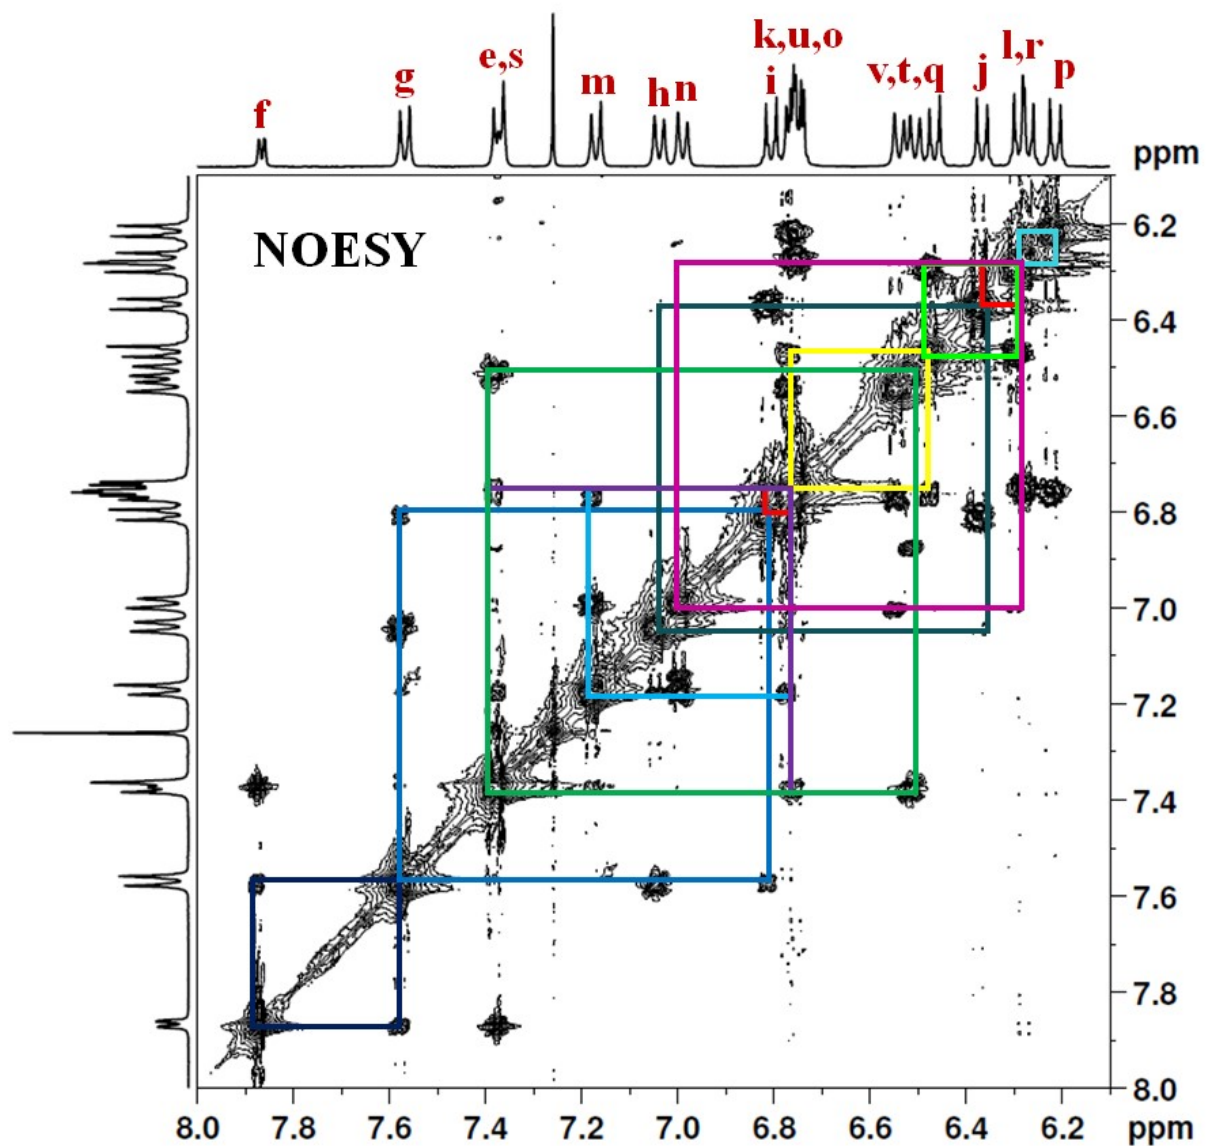

**Figure S24.** Partial  $^1\text{H}$ - $^1\text{H}$  NOESY spectrum of compound **12** recorded in  $\text{CDCl}_3$  at room temperature on 400 MHz instrument.

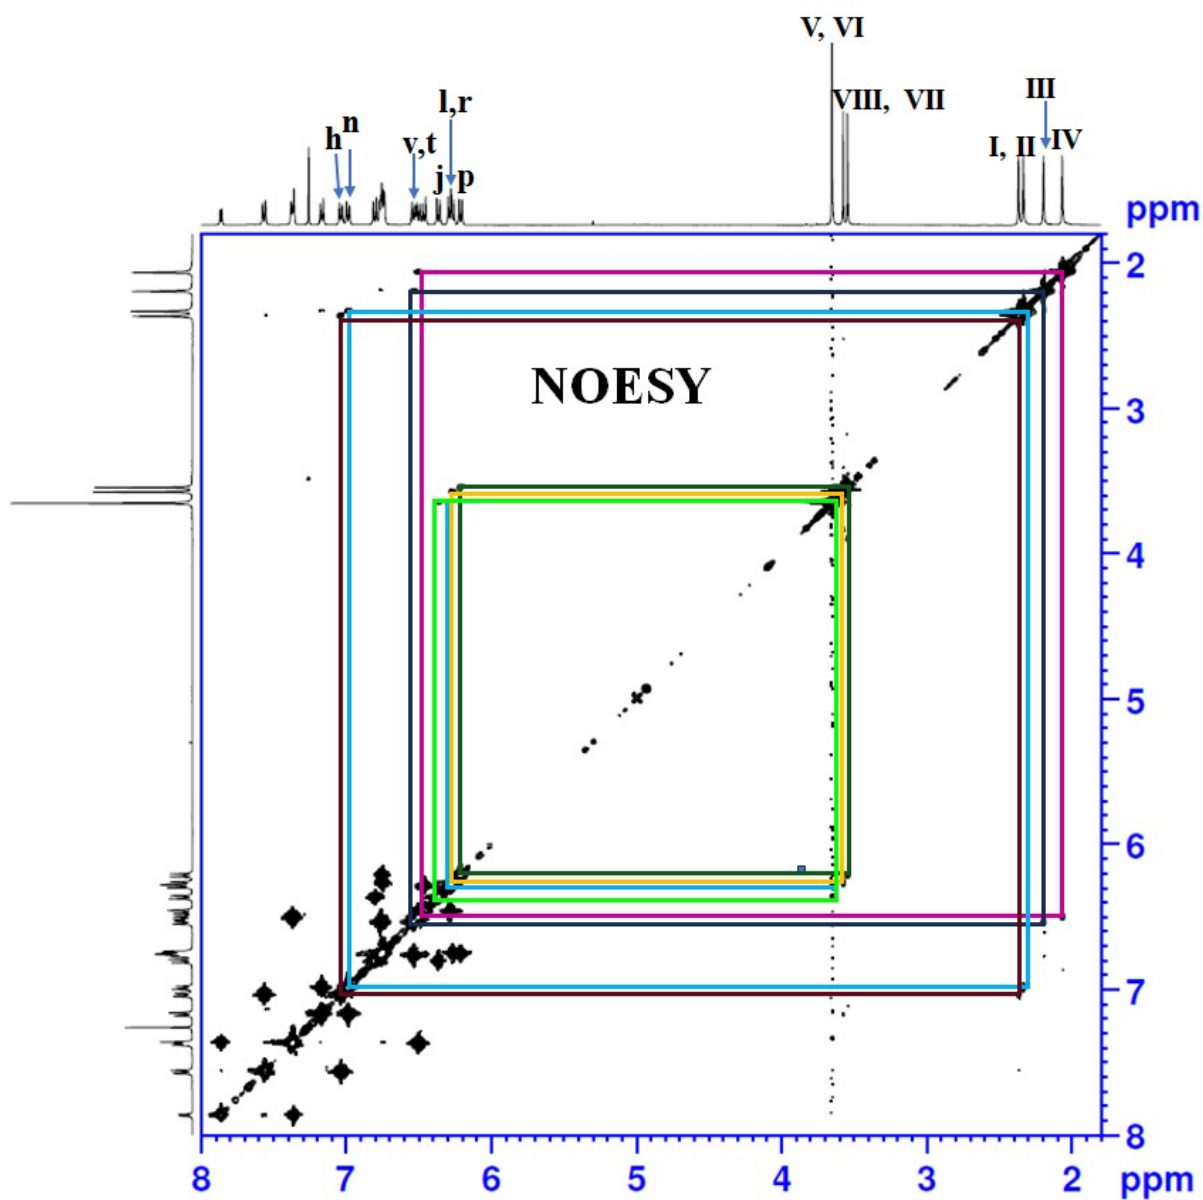

**Figure S25.**  $^1\text{H}$ - $^1\text{H}$  NOESY spectrum of compound **12** recorded in  $\text{CDCl}_3$  at room temperature on 400 MHz instrument.

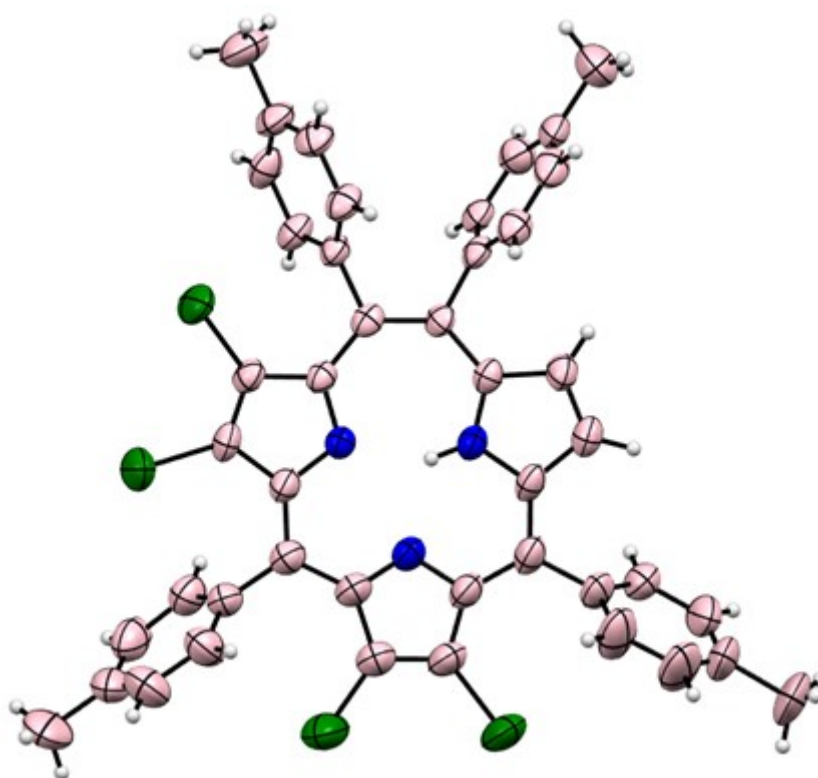

**Figure S26.** X-ray crystal structure of compound **8**. Thermal Ellipsoids are set at 50% probability.

**Table S1.** Crystal data and structure refinement for compound **8**.

|                                             |                                                                |
|---------------------------------------------|----------------------------------------------------------------|
| Identification code                         | MR-AS-BR4                                                      |
| Empirical formula                           | C <sub>44</sub> H <sub>31</sub> Br <sub>4</sub> N <sub>3</sub> |
| Formula weight                              | 921.36                                                         |
| Temperature/K                               | 301.00                                                         |
| Crystal system                              | monoclinic                                                     |
| Space group                                 | C2/c                                                           |
| a/Å                                         | 41.29(3)                                                       |
| b/Å                                         | 8.552(7)                                                       |
| c/Å                                         | 23.83(2)                                                       |
| α/°                                         | 90                                                             |
| β/°                                         | 113.027(16)                                                    |
| γ/°                                         | 90                                                             |
| Volume/Å <sup>3</sup>                       | 7746(12)                                                       |
| Z                                           | 8                                                              |
| ρ <sub>calc</sub> /g/cm <sup>3</sup>        | 1.580                                                          |
| μ/mm <sup>-1</sup>                          | 4.192                                                          |
| F(000)                                      | 3648.0                                                         |
| Crystal size/mm <sup>3</sup>                | 0.25 × 0.201 × 0.013                                           |
| Radiation                                   | MoKα (λ = 0.71073)                                             |
| 2θ range for data collection/°              | 4.288 to 51.362                                                |
| Index ranges                                | -40 ≤ h ≤ 50, -10 ≤ k ≤ 10, -29 ≤ l ≤ 29                       |
| Reflections collected                       | 43561                                                          |
| Independent reflections                     | 7330 [R <sub>int</sub> = 0.1477, R <sub>sigma</sub> = 0.1152]  |
| Data/restraints/parameters                  | 7330/469/464                                                   |
| Goodness-of-fit on F <sup>2</sup>           | 0.994                                                          |
| Final R indexes [I ≥ 2σ (I)]                | R <sub>1</sub> = 0.0586, wR <sub>2</sub> = 0.0970              |
| Final R indexes [all data]                  | R <sub>1</sub> = 0.1683, wR <sub>2</sub> = 0.1273              |
| Largest diff. peak/hole / e Å <sup>-3</sup> | 0.77/-0.50                                                     |

**Table S2.** Bond Lengths for compound **8**.

| Atom | Atom | Length/Å | Atom | Atom | Length/Å  |
|------|------|----------|------|------|-----------|
| Br1  | C2   | 1.852(7) | C16  | C38  | 1.487(8)  |
| Br2  | C3   | 1.866(7) | C17  | C18  | 1.377(9)  |
| Br3  | C7   | 1.876(6) | C17  | C22  | 1.372(9)  |
| Br4  | C8   | 1.862(6) | C18  | C19  | 1.383(10) |
| N1   | C1   | 1.350(7) | C19  | C20  | 1.356(11) |
| N1   | C4   | 1.336(8) | C20  | C21  | 1.385(11) |
| N2   | C6   | 1.380(7) | C20  | C23  | 1.515(10) |
| N2   | C9   | 1.351(7) | C21  | C22  | 1.415(10) |

|     |     |          |     |     |           |
|-----|-----|----------|-----|-----|-----------|
| N3  | C12 | 1.337(7) | C24 | C25 | 1.390(8)  |
| N3  | C15 | 1.375(7) | C24 | C29 | 1.379(8)  |
| C1  | C2  | 1.446(9) | C25 | C26 | 1.385(8)  |
| C1  | C16 | 1.419(9) | C26 | C27 | 1.380(9)  |
| C2  | C3  | 1.389(9) | C27 | C28 | 1.384(9)  |
| C3  | C4  | 1.476(8) | C27 | C30 | 1.516(8)  |
| C4  | C5  | 1.428(8) | C28 | C29 | 1.377(8)  |
| C5  | C6  | 1.415(8) | C31 | C32 | 1.373(8)  |
| C5  | C17 | 1.489(9) | C31 | C36 | 1.395(8)  |
| C6  | C7  | 1.459(8) | C32 | C33 | 1.402(8)  |
| C7  | C8  | 1.358(8) | C33 | C34 | 1.382(9)  |
| C8  | C9  | 1.467(8) | C34 | C35 | 1.386(9)  |
| C9  | C10 | 1.434(8) | C34 | C37 | 1.529(9)  |
| C10 | C11 | 1.411(8) | C35 | C36 | 1.375(9)  |
| C10 | C24 | 1.507(8) | C38 | C39 | 1.392(9)  |
| C11 | C12 | 1.434(7) | C38 | C43 | 1.394(9)  |
| C11 | C31 | 1.519(8) | C39 | C40 | 1.373(9)  |
| C12 | C13 | 1.439(8) | C40 | C41 | 1.378(12) |
| C13 | C14 | 1.356(8) | C41 | C42 | 1.363(12) |
| C14 | C15 | 1.428(8) | C41 | C44 | 1.554(11) |
| C15 | C16 | 1.414(8) | C42 | C43 | 1.387(10) |

**Table S3.** Bond Angles for compound **8**.

| Atom | Atom | Atom | Angle/°  | Atom | Atom | Atom | Angle/°   |
|------|------|------|----------|------|------|------|-----------|
| C4   | N1   | C1   | 109.7(6) | C1   | C16  | C38  | 122.9(6)  |
| C9   | N2   | C6   | 109.5(5) | C15  | C16  | C1   | 120.0(6)  |
| C12  | N3   | C15  | 111.6(5) | C15  | C16  | C38  | 117.0(6)  |
| N1   | C1   | C2   | 109.3(6) | C18  | C17  | C5   | 120.8(7)  |
| N1   | C1   | C16  | 117.6(6) | C22  | C17  | C5   | 120.3(7)  |
| C16  | C1   | C2   | 131.9(6) | C22  | C17  | C18  | 118.9(7)  |
| C1   | C2   | Br1  | 128.7(6) | C17  | C18  | C19  | 119.8(8)  |
| C3   | C2   | Br1  | 125.0(6) | C20  | C19  | C18  | 122.5(9)  |
| C3   | C2   | C1   | 106.2(6) | C19  | C20  | C21  | 118.4(9)  |
| C2   | C3   | Br2  | 124.0(5) | C19  | C20  | C23  | 121.4(10) |
| C2   | C3   | C4   | 105.8(6) | C21  | C20  | C23  | 120.1(10) |
| C4   | C3   | Br2  | 129.9(5) | C20  | C21  | C22  | 119.5(8)  |
| N1   | C4   | C3   | 108.6(6) | C17  | C22  | C21  | 120.7(8)  |
| N1   | C4   | C5   | 119.9(6) | C25  | C24  | C10  | 119.8(6)  |
| C5   | C4   | C3   | 131.4(7) | C29  | C24  | C10  | 122.2(6)  |
| C4   | C5   | C17  | 119.7(6) | C29  | C24  | C25  | 118.0(6)  |

|     |     |     |          |     |     |     |           |
|-----|-----|-----|----------|-----|-----|-----|-----------|
| C6  | C5  | C4  | 118.3(6) | C26 | C25 | C24 | 120.0(6)  |
| C6  | C5  | C17 | 122.0(6) | C27 | C26 | C25 | 122.4(6)  |
| N2  | C6  | C5  | 123.9(6) | C26 | C27 | C28 | 116.6(6)  |
| N2  | C6  | C7  | 107.2(5) | C26 | C27 | C30 | 121.7(7)  |
| C5  | C6  | C7  | 128.8(6) | C28 | C27 | C30 | 121.8(7)  |
| C6  | C7  | Br3 | 128.2(5) | C29 | C28 | C27 | 121.9(7)  |
| C8  | C7  | Br3 | 123.5(5) | C28 | C29 | C24 | 121.1(6)  |
| C8  | C7  | C6  | 108.0(5) | C32 | C31 | C11 | 122.0(6)  |
| C7  | C8  | Br4 | 123.4(5) | C32 | C31 | C36 | 118.8(6)  |
| C7  | C8  | C9  | 106.6(5) | C36 | C31 | C11 | 119.1(6)  |
| C9  | C8  | Br4 | 129.4(5) | C31 | C32 | C33 | 120.4(6)  |
| N2  | C9  | C8  | 108.5(5) | C34 | C33 | C32 | 120.6(7)  |
| N2  | C9  | C10 | 122.9(5) | C33 | C34 | C35 | 118.4(7)  |
| C10 | C9  | C8  | 128.6(6) | C33 | C34 | C37 | 120.1(7)  |
| C9  | C10 | C24 | 116.0(5) | C35 | C34 | C37 | 121.4(7)  |
| C11 | C10 | C9  | 129.1(5) | C36 | C35 | C34 | 121.0(7)  |
| C11 | C10 | C24 | 114.9(5) | C35 | C36 | C31 | 120.7(7)  |
| C10 | C11 | C12 | 130.5(6) | C39 | C38 | C16 | 122.1(6)  |
| C10 | C11 | C31 | 118.4(5) | C39 | C38 | C43 | 118.8(7)  |
| C12 | C11 | C31 | 111.1(5) | C43 | C38 | C16 | 119.2(7)  |
| N3  | C12 | C11 | 126.2(6) | C40 | C39 | C38 | 120.4(7)  |
| N3  | C12 | C13 | 106.3(5) | C39 | C40 | C41 | 121.0(9)  |
| C11 | C12 | C13 | 127.5(6) | C40 | C41 | C44 | 120.3(11) |
| C14 | C13 | C12 | 108.3(6) | C42 | C41 | C40 | 118.9(8)  |
| C13 | C14 | C15 | 107.7(6) | C42 | C41 | C44 | 120.8(10) |
| N3  | C15 | C14 | 106.0(6) | C41 | C42 | C43 | 121.6(9)  |
| N3  | C15 | C16 | 124.2(6) | C42 | C43 | C38 | 119.3(8)  |
| C16 | C15 | C14 | 129.7(6) |     |     |     |           |

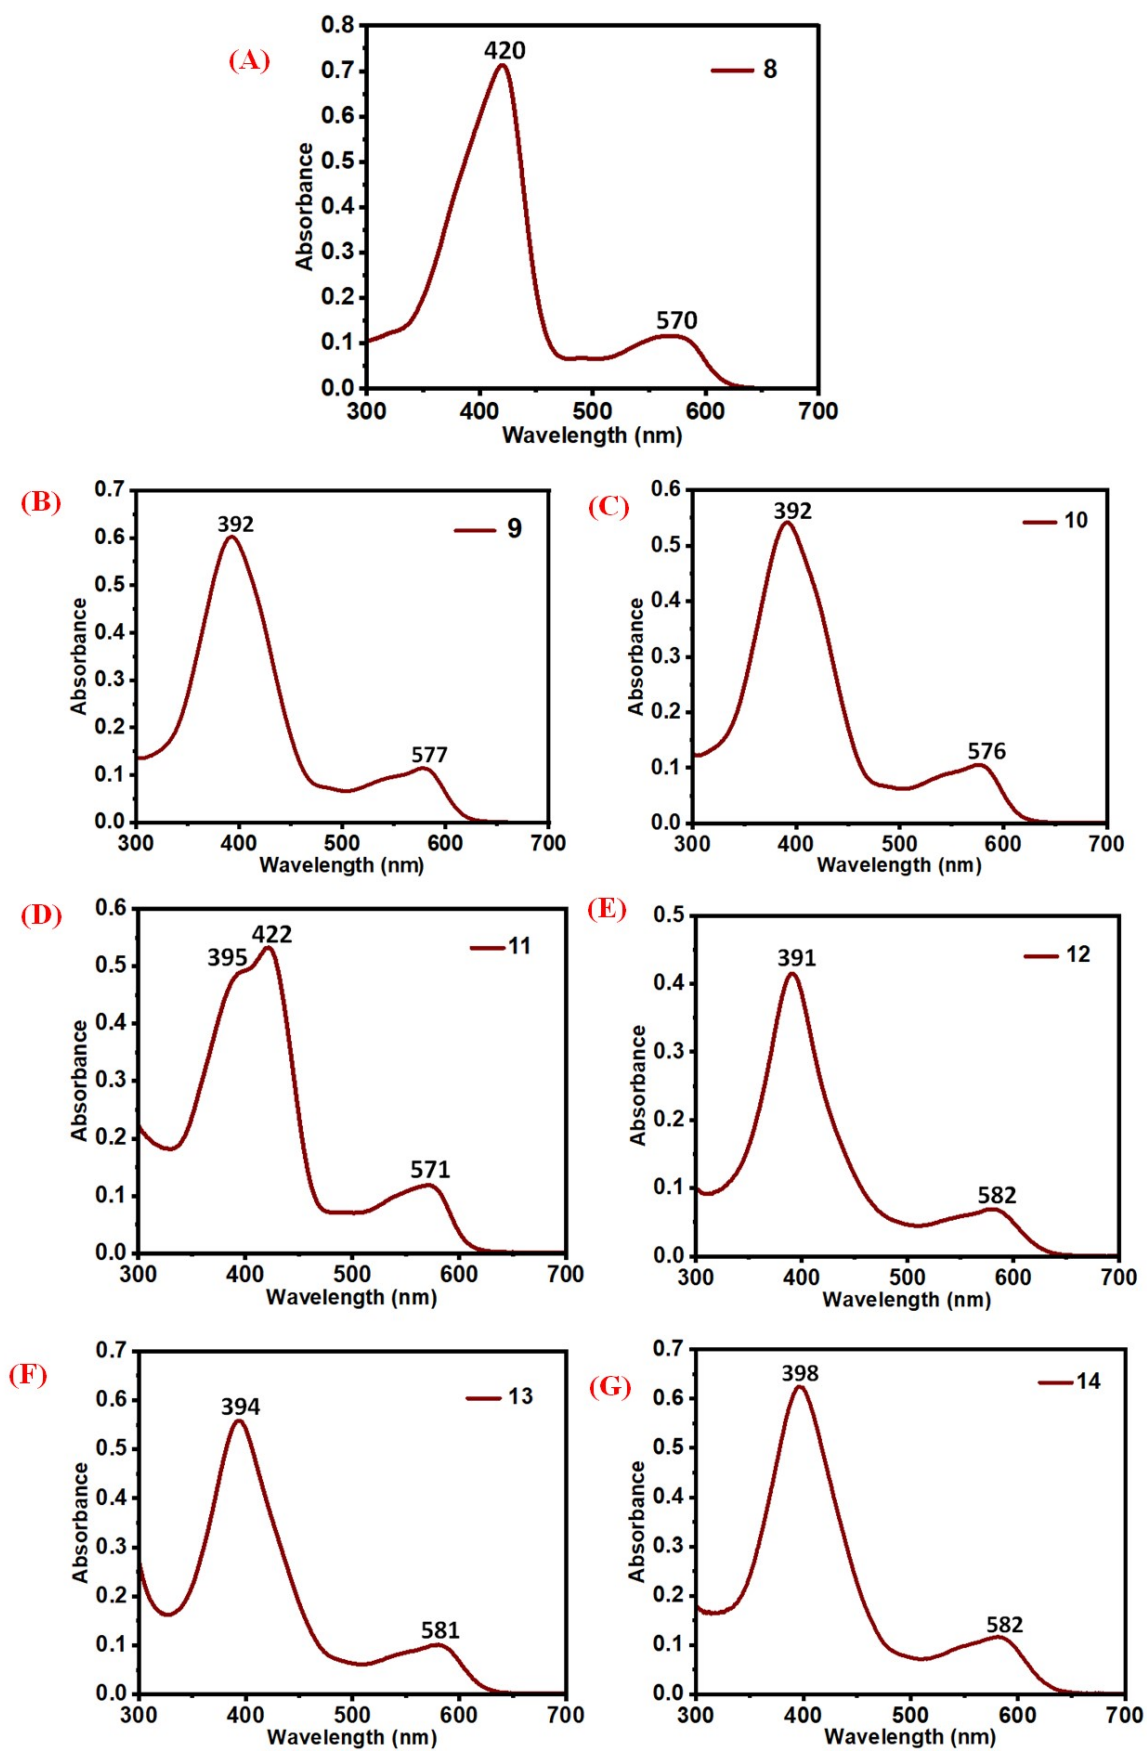

**Figure S27.** Absorption spectra of compound **8** (A), **9** (B), **10** (C), **11** (D), **12** (E), **13** (F) and **14** (G) ( $10^{-5}$  M) recorded in chloroform at room temperature.



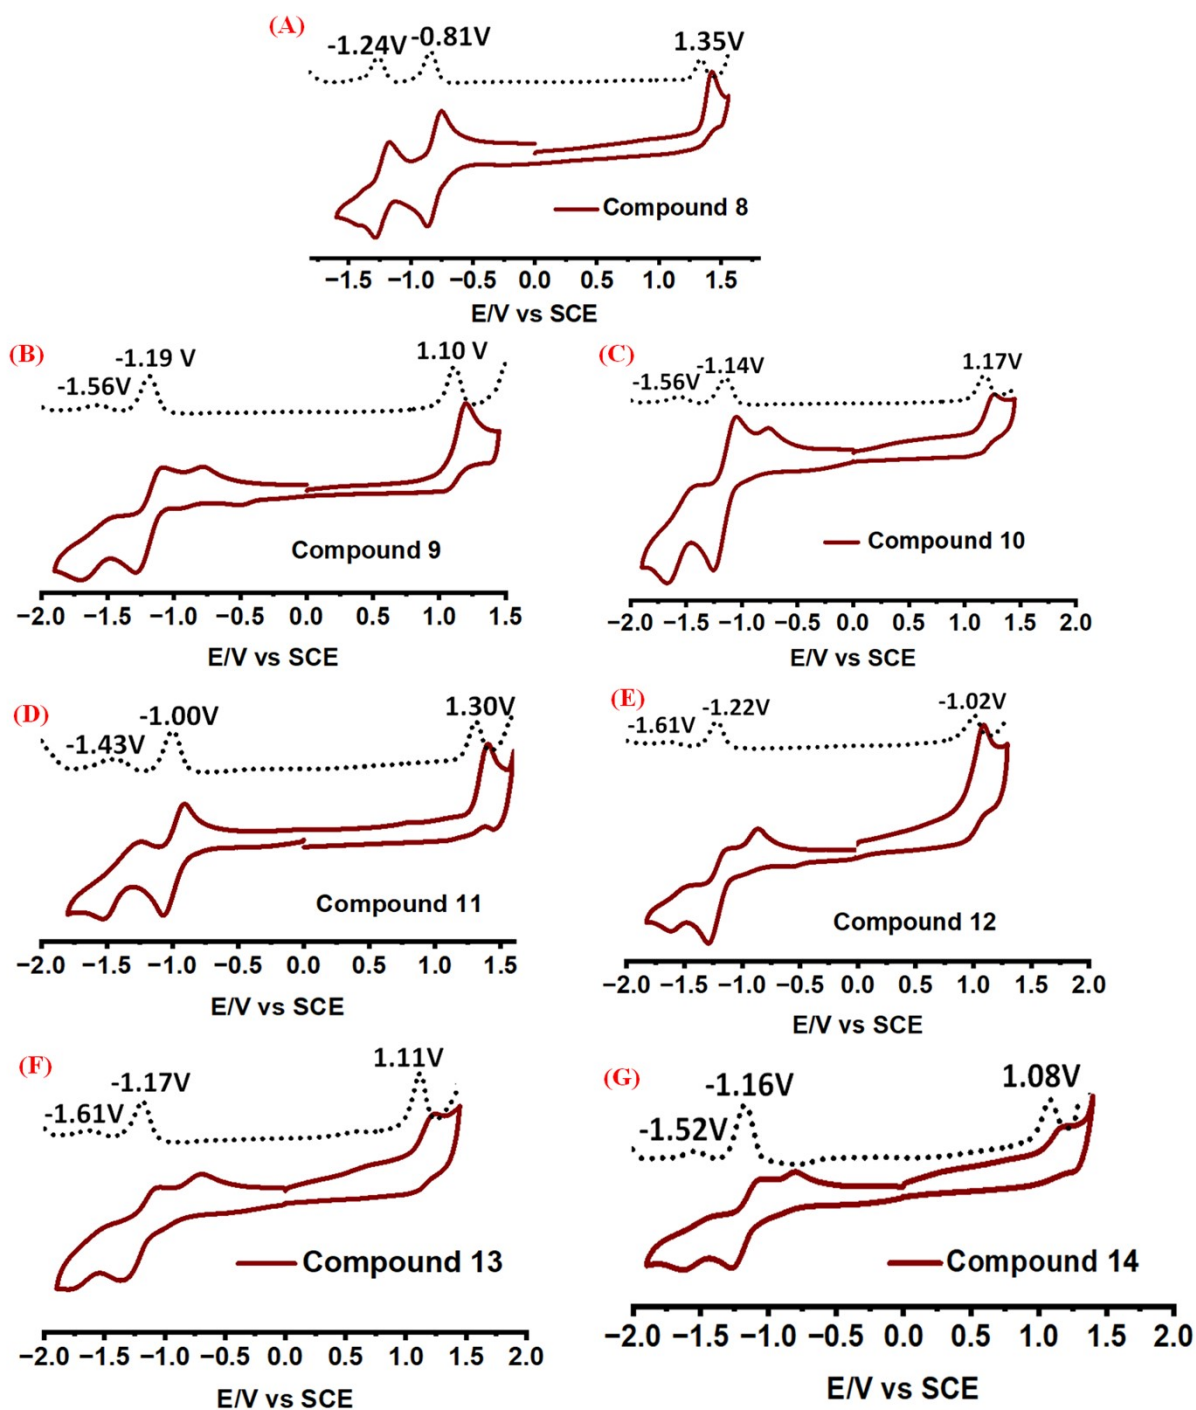

**Figure S28.** Comparison of cyclic voltammograms (coloured solid line) with their differential pulse voltammogram (dotted black line) of compounds **8-14** recorded in dry  $\text{CH}_2\text{Cl}_2$  with 0.1 M TBAP as the supporting electrolyte and a saturated calomel electrode (SCE) as the reference electrode at a scan rate of  $50 \text{ mV s}^{-1}$ . A saturated calomel electrode (SCE) was employed as the reference electrode, glassy carbon as the working electrode, and

platinum wire as the auxiliary electrode. (Note that polarographic convention has been followed for plotting CV starting at 0 V)

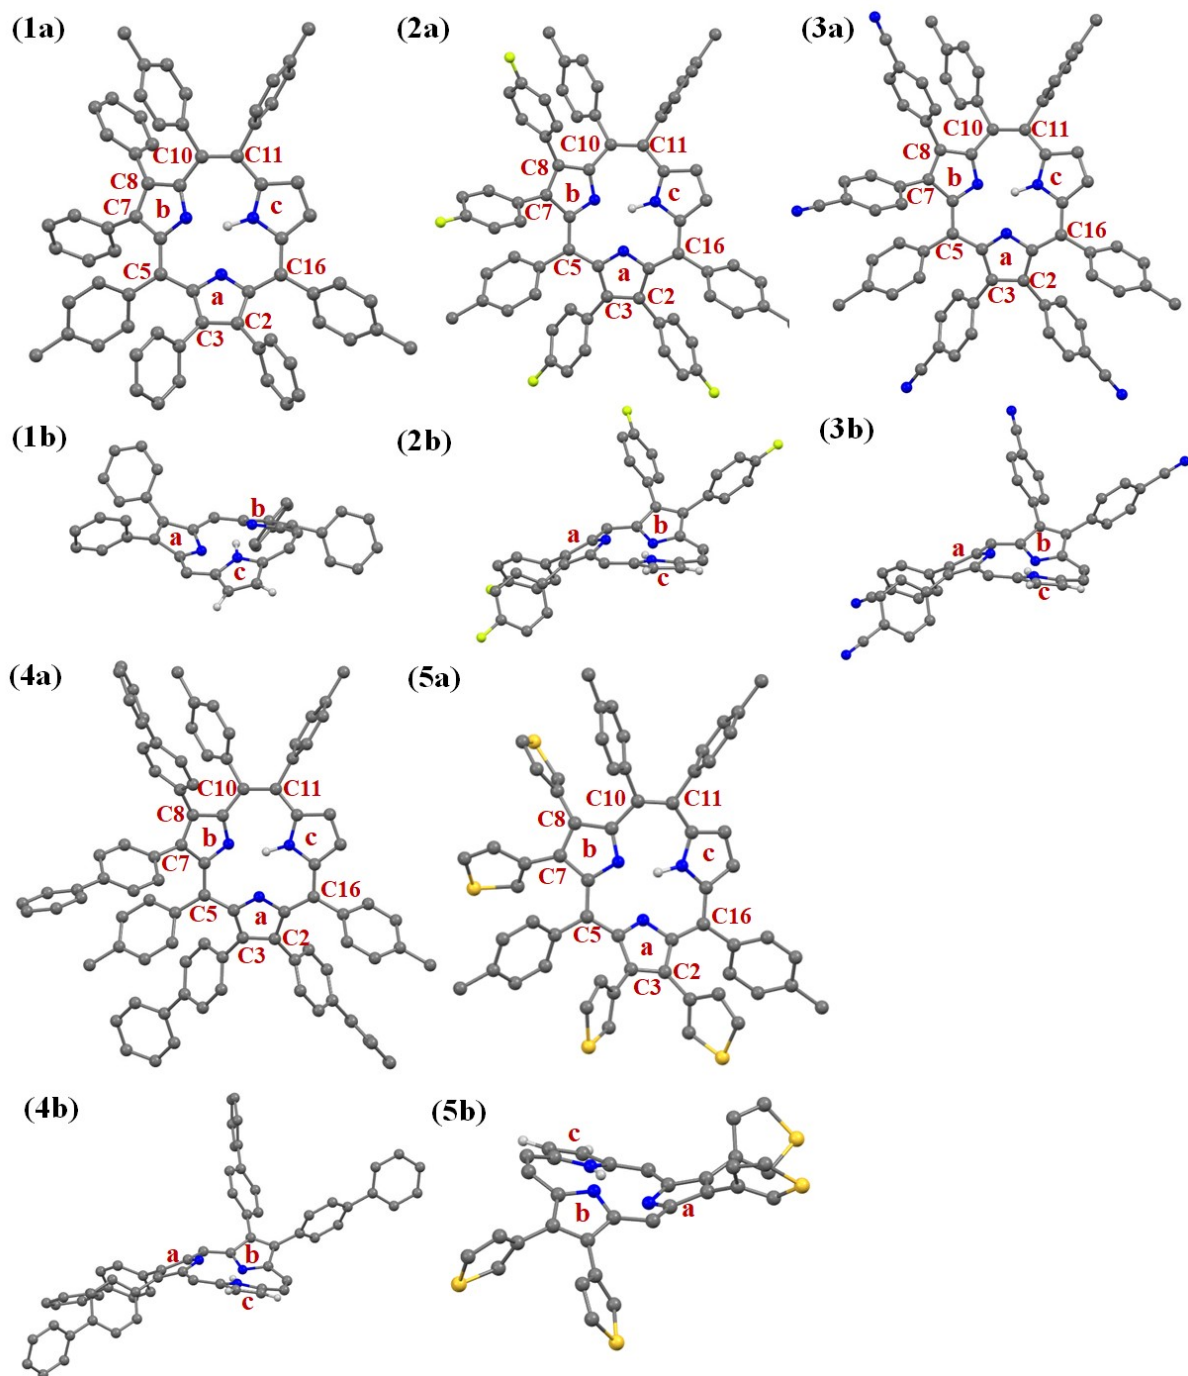

**Figure S29.** Ground state optimized structures with top views and side views of compounds 9 (1a and 1b), 10 (2a and 2b), 11 (3a and 3b), 13 (4a and 4b), and 14 (5a and 5b).

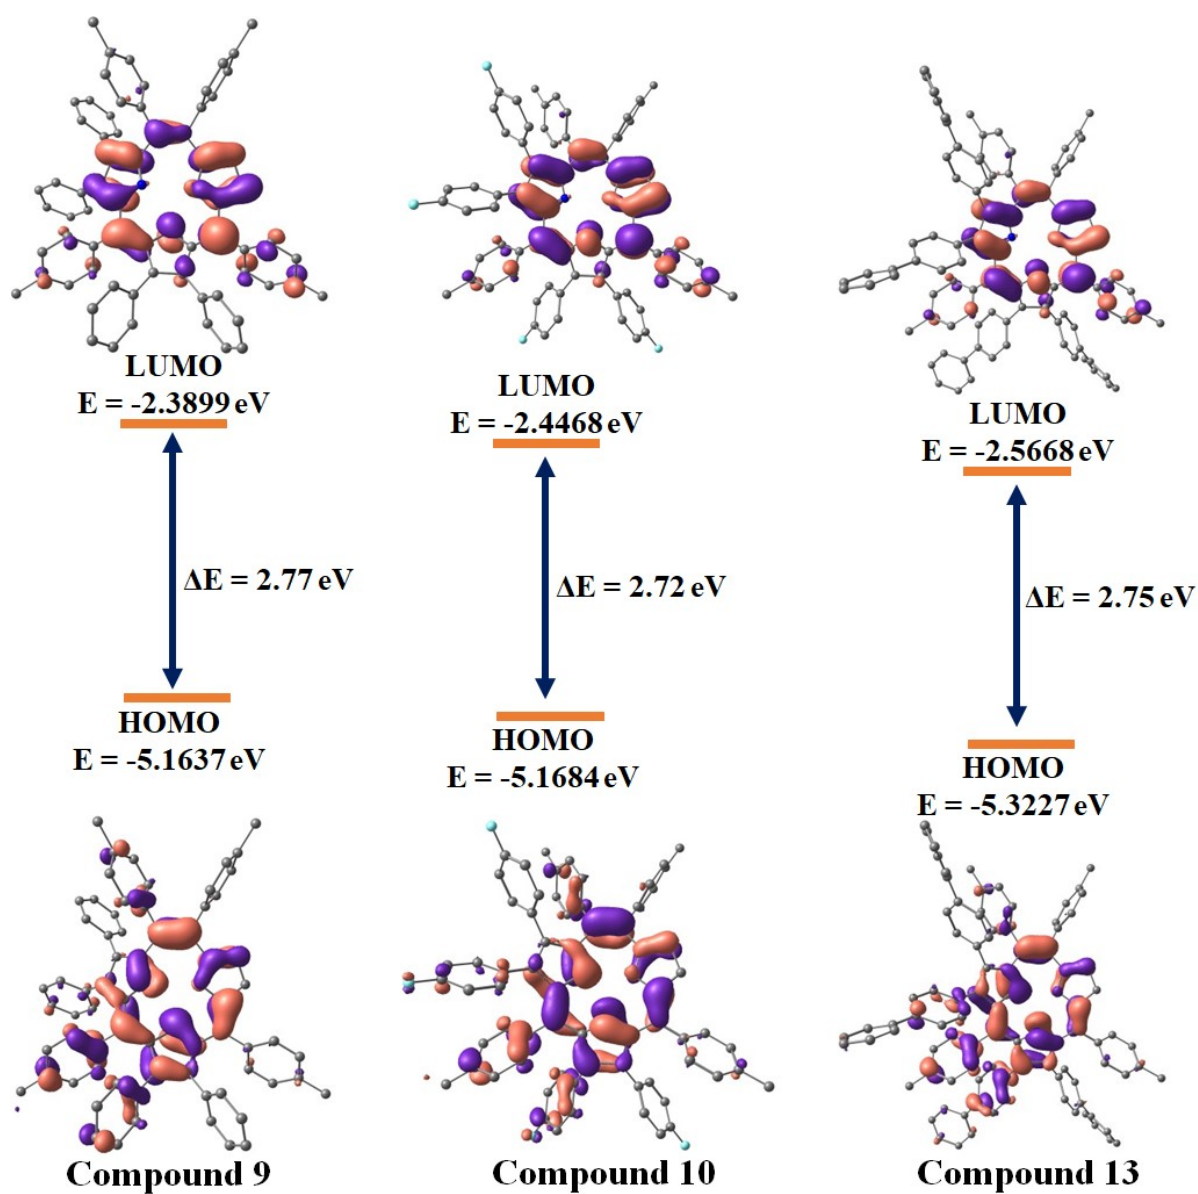

**Figure S30.** Energy-level diagram (selected FMOs) of compounds **9**, **10** and **13** calculated by B3LYP/6-31G (d, p) method.

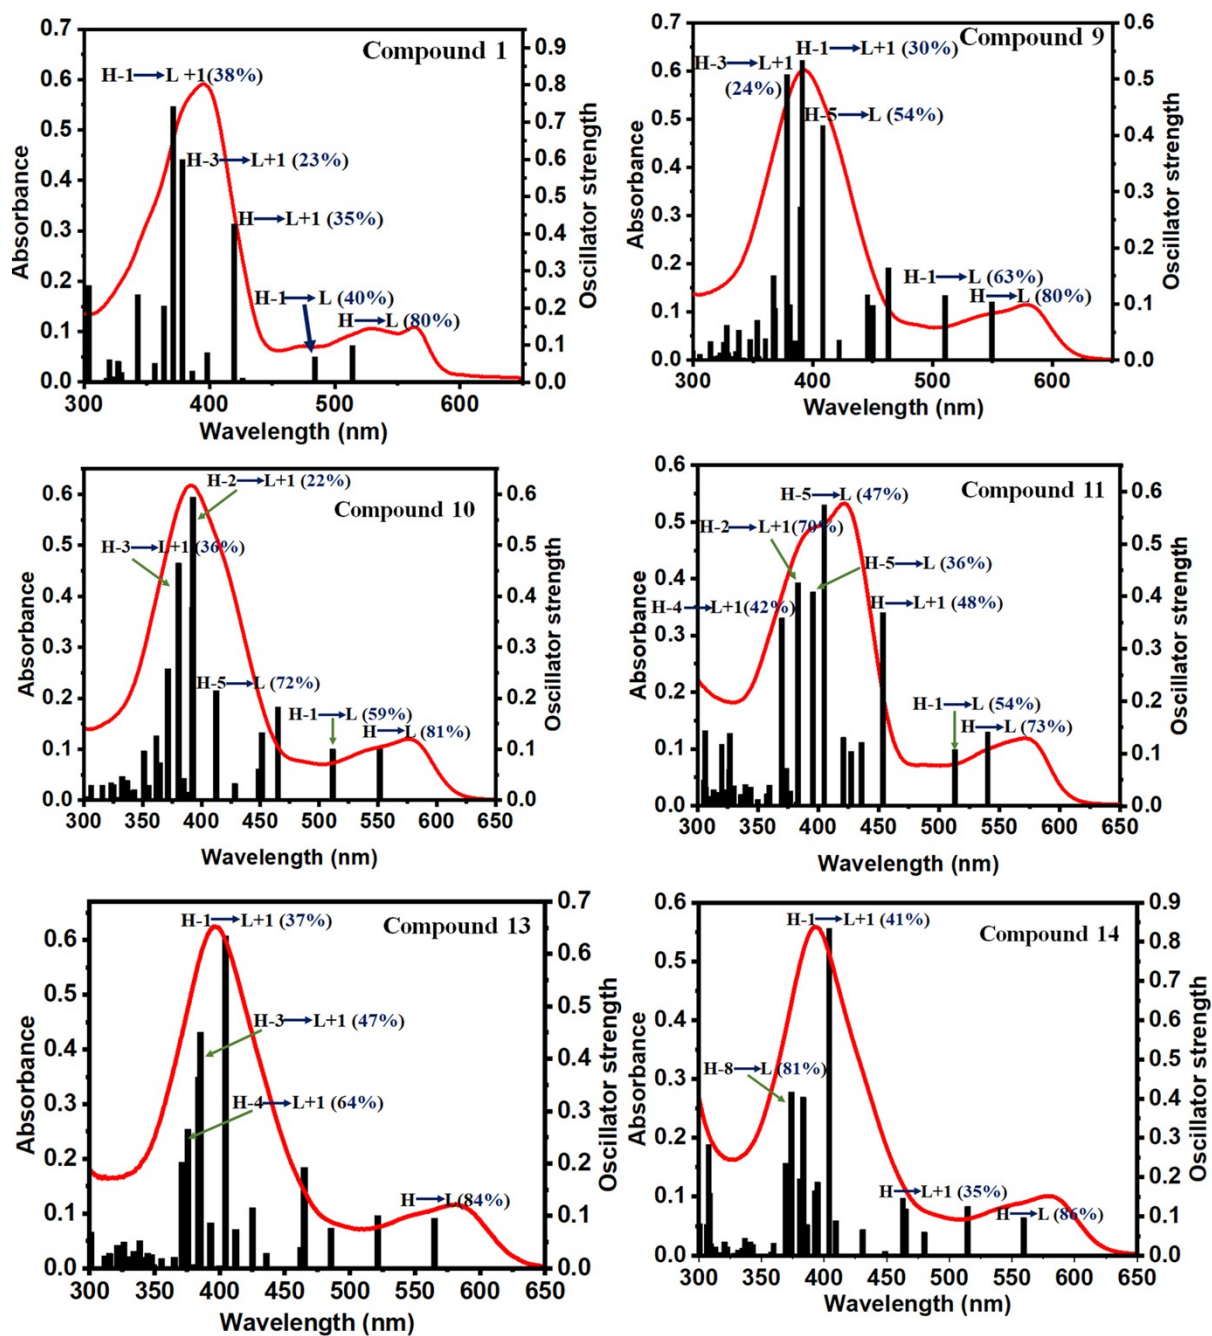

**Figure S31.** Calculated excitations (black vertical lines) and experimental absorption spectrum (red line) for compounds.

**Table S4.** Selected TD-DFT calculated oscillator strengths and compositions of the major electronic transitions of **8**.

| Wavelength (nm) | Osc. Strength | Major contributions                                                                  | Minor contributions                                                                                             |
|-----------------|---------------|--------------------------------------------------------------------------------------|-----------------------------------------------------------------------------------------------------------------|
| 537.705755105   | 0.1443        | H-1->LUMO (10%), HOMO->LUMO (72%)                                                    | H-1->L+1 (9%), HOMO->L+1 (5%)                                                                                   |
| 509.971178892   | 0.0724        | H-1->LUMO (53%), HOMO->LUMO (14%), HOMO->L+1 (30%)                                   |                                                                                                                 |
| 465.703312971   | 0.0641        | H-3->LUMO (61%), HOMO->L+1 (21%)                                                     | H-2->LUMO (4%), H-1->LUMO (8%)                                                                                  |
| 453.059245093   | 0.0322        | H-4->LUMO (12%), H-2->LUMO (83%)                                                     | HOMO->L+1 (3%)                                                                                                  |
| 440.989482526   | 0.116         | H-4->LUMO (63%), H-1->L+1 (14%)                                                      | H-3->LUMO (3%), H-2->LUMO (6%), H-1->LUMO (3%), HOMO->L+1 (5%)                                                  |
| 435.215504817   | 0.3099        | H-4->LUMO (12%), H-3->LUMO (29%), H-1->LUMO (16%), HOMO->L+1 (20%)                   | H-5->LUMO (3%), H-4->L+1 (5%), H-2->LUMO (4%), H-2->L+1 (6%)                                                    |
| 410.353455392   | 0.2689        | H-5->LUMO (44%), H-1->L+1 (33%)                                                      | H-4->LUMO (6%), H-4->L+1 (4%), HOMO->LUMO (3%)                                                                  |
| 402.089161707   | 0.1463        | H-5->LUMO (28%), H-3->L+1 (52%), H-1->L+1 (10%)                                      |                                                                                                                 |
| 399.575213549   | 0.1391        | H-2->L+1 (77%)                                                                       | H-6->LUMO (2%), H-5->LUMO (3%), H-1->LUMO (2%), HOMO->L+1 (9%)                                                  |
| 390.353859997   | 0.3555        | H-5->LUMO (15%), H-3->L+1 (37%)                                                      | H-12->LUMO (3%), H-11->LUMO (3%), H-10->LUMO (9%), H-9->LUMO (8%), H-6->LUMO (2%), H-2->L+1 (6%), H-1->L+1 (8%) |
| 385.451075708   | 0.4671        | H-11->LUMO (12%), H-10->LUMO (10%), H-4->L+1 (28%), H-1->L+1 (14%)                   | H-12->LUMO (4%), H-9->LUMO (7%), H-7->LUMO (3%), H-6->LUMO (7%), H-3->L+1 (3%), HOMO->LUMO (4%)                 |
| 384.435189644   | 0.1945        | H-11->LUMO (12%), H-10->LUMO (11%), H-9->LUMO (12%), H-6->LUMO (11%), H-4->L+1 (42%) | H-2->L+1 (5%)                                                                                                   |
| 382.584605216   | 0.1209        | H-6->LUMO (75%), H-4->L+1 (16%)                                                      |                                                                                                                 |
| 365.336337956   | 0.013         | H-7->LUMO (55%), H-5->L+1 (29%)                                                      | H-9->LUMO (4%), H-8->LUMO (6%)                                                                                  |
| 364.777407432   | 0.0207        | H-8->LUMO (86%)                                                                      | H-8->L+1 (3%), H-7->LUMO (3%), H-5->L+1 (3%)                                                                    |
| 360.702275077   | 0.1072        | H-7->LUMO (31%), H-5->L+1 (55%)                                                      | H-10->LUMO (3%)                                                                                                 |

|               |        |                                                                     |                                                                 |
|---------------|--------|---------------------------------------------------------------------|-----------------------------------------------------------------|
| 353.846265625 | 0.0308 | H-11->LUMO (31%), H-9->LUMO (53%)                                   | H-12->LUMO (2%), H-10->LUMO (3%), H-5->L+1 (4%)                 |
| 352.448101121 | 0.0084 | H-11->LUMO (25%), H-10->LUMO (53%), H-9->LUMO (10%)                 | H-10->L+1 (5%), H-9->L+1 (3%)                                   |
| 348.319126316 | 0.067  | H-11->L+1 (29%), H-10->L+1 (24%), H-9->L+1 (20%)                    | H-13->L+1 (3%), H-11->LUMO (6%), H-7->L+1 (5%)                  |
| 342.545083609 | 0.0023 | H-6->L+1 (85%)                                                      | H-12->LUMO (7%)                                                 |
| 336.858645363 | 0.0686 | H-13->LUMO (68%), H-12->LUMO (14%)                                  | H-6->L+1 (7%)                                                   |
| 330.703883631 | 0.1065 | H-13->LUMO (13%), H-12->LUMO (39%), H-8->L+1 (24%)                  | H-15->LUMO (4%), H-7->L+1 (6%), H-6->L+1 (3%), H-1->L+1 (2%)    |
| 330.483508402 | 0.0632 | H-12->LUMO (10%), H-8->L+1 (66%)                                    | H-13->LUMO (6%), H-8->LUMO (3%), H-7->L+1 (6%)                  |
| 325.127689233 | 0.016  | H-15->LUMO (15%), H-7->L+1 (62%)                                    | H-14->LUMO (5%), H-12->LUMO (4%), H-10->L+1 (2%), H-9->L+1 (2%) |
| 321.635864409 | 0.1205 | H-15->LUMO (55%), H-14->LUMO (10%), H-7->L+1 (16%)                  | H-13->LUMO (4%), H-12->LUMO (7%)                                |
| 317.322361313 | 0.0182 | H-10->L+1 (21%), H-9->L+1 (67%)                                     | H-11->L+1 (8%)                                                  |
| 313.020255528 | 0.0058 | H-11->L+1 (53%), H-10->L+1 (41%)                                    |                                                                 |
| 305.778955317 | 0.0159 | H-15->LUMO (14%), H-14->LUMO (78%)                                  | H-15->L+1 (3%)                                                  |
| 303.429169654 | 0.0506 | H-12->L+1 (76%)                                                     | H-17->LUMO (2%), H-15->L+1 (2%), H-13->L+1 (5%), HOMO->L+2 (7%) |
| 297.52398016  | 0.035  | H-15->L+1 (27%), H-13->L+1 (52%)                                    | H-14->L+1 (5%), H-12->L+1 (9%)                                  |
| 292.836847852 | 0.0364 | H-16->LUMO (63%), H-15->L+1 (14%), H-13->L+1 (14%)                  | H-14->L+1 (3%)                                                  |
| 291.933583735 | 0.0206 | H-16->LUMO (33%), H-15->L+1 (30%), H-13->L+1 (21%)                  | H-14->L+1 (9%)                                                  |
| 287.066897458 | 0.1465 | HOMO->L+2 (84%)                                                     | H-12->L+1 (5%)                                                  |
| 281.309146009 | 0.0091 | H-17->LUMO (40%), H-1->L+2 (50%)                                    | H-15->L+1 (2%)                                                  |
| 276.904953684 | 0.0036 | H-17->LUMO (12%), H-16->L+1 (14%), H-15->L+1 (12%), H-14->L+1 (54%) | H-1->L+2 (2%)                                                   |
| 275.839176409 | 0.0721 | H-17->LUMO (33%), H-14->L+1 (17%), H-1->L+2 (34%)                   | H-16->L+1 (4%), H-15->L+1 (4%)                                  |
| 274.052724326 | 0.0188 | H-16->L+1 (78%)                                                     | H-17->LUMO (6%), H-14->L+1 (6%), H-1->L+2 (5%)                  |
| 262.817579252 | 0.0183 | H-19->LUMO (13%), H-2-                                              | H-18->LUMO (9%), H-4-                                           |

|               |        |                                                                    |                                                                                                                         |
|---------------|--------|--------------------------------------------------------------------|-------------------------------------------------------------------------------------------------------------------------|
|               |        | >L+2 (61%)                                                         | >L+2 (3%), H-3->L+2 (6%)                                                                                                |
| 261.404581514 | 0.0034 | H-18->LUMO (38%), H-17->L+1 (22%), H-2->L+2 (20%)                  | H-19->LUMO (9%)                                                                                                         |
| 260.94793638  | 0.0464 | H-19->LUMO (46%), H-17->L+1 (19%), H-3->L+2 (26%)                  |                                                                                                                         |
| 260.427224442 | 0.0716 | H-19->LUMO (19%), H-18->LUMO (14%), H-3->L+2 (53%)                 | H-4->L+2 (3%), H-2->L+2 (6%)                                                                                            |
| 256.451811964 | 0.0479 | H-18->LUMO (14%), H-17->L+1 (29%), H-4->L+2 (23%), HOMO->L+4 (11%) | H-19->LUMO (2%), H-3->L+2 (7%), H-2->L+2 (5%)                                                                           |
| 255.342682701 | 0.0055 | H-4->L+2 (20%), HOMO->L+4 (47%), HOMO->L+5 (11%)                   | H-6->L+2 (2%), HOMO->L+3 (7%)                                                                                           |
| 254.050351438 | 0.0169 | H-17->L+1 (15%), H-4->L+2 (36%)                                    | H-21->LUMO (3%), H-20->LUMO (9%), H-19->LUMO (4%), H-18->LUMO (8%), HOMO->L+4 (9%)                                      |
| 253.432388317 | 0.0082 | HOMO->L+3 (27%), HOMO->L+4 (13%), HOMO->L+5 (42%)                  |                                                                                                                         |
| 251.2497072   | 0.0181 | HOMO->L+3 (38%), HOMO->L+5 (27%)                                   | H-4->L+9 (3%), H-2->L+3 (3%), H-2->L+9 (5%), HOMO->L+9 (8%)                                                             |
| 249.646007193 | 0.0073 | H-21->LUMO (14%), H-20->LUMO (55%)                                 | H-18->LUMO (7%), H-17->L+1 (4%), H-4->L+2 (5%)                                                                          |
| 248.321001847 | 0.0016 | H-3->L+10 (11%), H-1->L+5 (19%), H-1->L+9 (10%)                    | H-4->L+9 (3%), H-3->L+5 (7%), H-3->L+8 (6%), H-3->L+9 (7%), H-1->L+3 (4%), H-1->L+4 (4%), H-1->L+8 (6%), H-1->L+10 (5%) |
| 248.097396671 | 0.0095 | H-2->L+9 (11%), HOMO->L+3 (10%), HOMO->L+6 (20%), HOMO->L+9 (16%)  | H-4->L+9 (6%), H-4->L+10 (3%), H-2->L+6 (2%), H-2->L+10 (3%), HOMO->L+5 (7%), HOMO->L+10 (2%)                           |
| 245.440350415 | 0.021  | H-21->LUMO (13%), HOMO->L+8 (34%)                                  | H-20->LUMO (7%), H-6->L+2 (4%), H-5->L+2 (4%), H-3->L+5 (2%), H-3->L+9 (2%), HOMO->L+10 (5%), HOMO->L+12 (3%)           |

**Table S5.** Selected TD-DFT calculated oscillator strengths and compositions of the major electronic transitions of **9**.

| Wavelength (nm) | Osc. Strength | Major contributions              | Minor contributions            |
|-----------------|---------------|----------------------------------|--------------------------------|
| 549.088543013   | 0.1047        | H-1->L+1 (10%), HOMO->LUMO (80%) | H-1->LUMO (5%), HOMO->L+1 (2%) |

|               |        |                                                                                   |                                                                                                                   |
|---------------|--------|-----------------------------------------------------------------------------------|-------------------------------------------------------------------------------------------------------------------|
| 510.118053949 | 0.1161 | H-1->LUMO (63%), HOMO->L+1 (28%)                                                  | HOMO->LUMO (7%)                                                                                                   |
| 462.66211289  | 0.1645 | H-3->LUMO (14%), H-2->LUMO (30%), H-1->LUMO (14%), HOMO->L+1 (30%)                | H-2->L+1 (5%), H-1->L+1 (3%)                                                                                      |
| 449.674281925 | 0.0979 | H-2->LUMO (37%), H-1->L+1 (20%), HOMO->L+1 (19%)                                  | H-4->LUMO (8%), H-3->LUMO (3%), H-3->L+1 (4%), H-1->LUMO (4%)                                                     |
| 445.457525284 | 0.1172 | H-3->LUMO (80%), HOMO->L+1 (10%)                                                  | H-1->LUMO (5%)                                                                                                    |
| 421.743632261 | 0.0364 | H-4->LUMO (69%), H-2->LUMO (17%)                                                  | H-1->L+1 (4%)                                                                                                     |
| 408.097801298 | 0.4179 | H-5->LUMO (54%), H-1->L+1 (27%)                                                   | H-4->LUMO (2%), H-2->LUMO (3%), HOMO->LUMO (5%)                                                                   |
| 390.981656246 | 0.5337 | H-7->LUMO (11%), H-5->LUMO (17%), H-4->LUMO (14%), H-3->L+1 (13%), H-1->L+1 (21%) | H-9->LUMO (4%), H-2->LUMO (2%), H-2->L+1 (9%), HOMO->LUMO (4%)                                                    |
| 389.165363044 | 0.2733 | H-5->LUMO (13%), H-3->L+1 (39%), H-2->L+1 (30%)                                   | H-2->LUMO (5%), H-1->L+1 (6%)                                                                                     |
| 384.888687835 | 0.0355 | H-9->LUMO (16%), H-7->LUMO (40%), H-5->LUMO (11%), H-2->L+1 (13%)                 | H-17->LUMO (2%), H-12->LUMO (5%), H-1->L+1 (2%)                                                                   |
| 380.471332164 | 0.0998 | H-6->LUMO (61%), H-3->L+1 (13%), H-2->L+1 (12%)                                   | H-12->LUMO (3%), H-8->LUMO (2%), H-7->LUMO (2%)                                                                   |
| 378.035164839 | 0.5085 | H-6->LUMO (17%), H-3->L+1 (24%), H-2->L+1 (22%)                                   | H-15->LUMO (3%), H-13->LUMO (2%), H-11->LUMO (6%), H-8->LUMO (6%), H-5->LUMO (3%), H-1->LUMO (2%), HOMO->L+1 (5%) |
| 368.03666888  | 0.0937 | H-8->LUMO (12%), H-4->L+1 (58%)                                                   | H-6->LUMO (8%), H-5->L+1 (8%)                                                                                     |
| 366.871410008 | 0.1514 | H-8->LUMO (58%), H-4->L+1 (17%)                                                   | H-12->LUMO (2%), H-7->LUMO (3%), H-6->LUMO (7%)                                                                   |
| 360.146961634 | 0.0392 | H-9->LUMO (29%), H-7->LUMO (26%), H-5->L+1 (13%)                                  | H-13->LUMO (3%), H-11->LUMO (3%), H-10->LUMO (5%), H-8->LUMO (4%), H-4->L+1 (4%)                                  |
| 354.899650815 | 0.007  | H-11->LUMO (19%), H-9->LUMO (21%), H-5->L+1 (37%)                                 | H-7->LUMO (9%), H-4->L+1 (4%)                                                                                     |
| 353.62423494  | 0.0718 | H-12->LUMO (17%), H-11->LUMO (32%), H-8->LUMO (10%), H-5->L+1 (19%)               | H-7->L+1 (4%), H-4->L+1 (5%)                                                                                      |
| 350.336798565 | 0.0061 | H-10->LUMO (89%)                                                                  | H-11->LUMO (2%), H-9->LUMO (3%)                                                                                   |



|               |        |                                                                 |                                                                                                   |
|---------------|--------|-----------------------------------------------------------------|---------------------------------------------------------------------------------------------------|
| 347.53803227  | 0.0374 | H-12->LUMO (42%), H-11->LUMO (22%), H-9->LUMO (10%)             | H-18->LUMO (2%), H-17->LUMO (3%), H-13->LUMO (2%), H-7->LUMO (4%), H-5->L+1 (7%)                  |
| 341.422572595 | 0.0052 | H-9->L+1 (21%), H-7->L+1 (43%)                                  | H-13->LUMO (2%), H-12->LUMO (5%), H-11->L+1 (3%), H-8->L+1 (5%), H-5->L+1 (5%), H-4->L+1 (2%)     |
| 337.84079406  | 0.0545 | H-13->LUMO (70%)                                                | H-14->LUMO (5%), H-11->LUMO (3%), H-9->LUMO (5%), H-7->L+1 (2%), H-5->L+1 (5%)                    |
| 335.727573821 | 0.0158 | H-17->LUMO (17%), H-15->LUMO (20%), H-14->LUMO (30%)            | H-20->LUMO (4%), H-19->LUMO (2%), H-13->LUMO (9%), H-6->L+1 (7%)                                  |
| 333.362532298 | 0.0025 | H-17->LUMO (11%), H-6->L+1 (68%)                                | H-15->LUMO (5%), H-12->LUMO (3%)                                                                  |
| 331.313647085 | 0.007  | H-17->LUMO (11%), H-15->LUMO (19%), H-14->LUMO (58%)            | H-6->L+1 (6%)                                                                                     |
| 329.053831079 | 0.0143 | H-17->LUMO (33%), H-15->LUMO (35%)                              | H-18->LUMO (3%), H-16->LUMO (5%), H-12->LUMO (4%), H-8->L+1 (7%), H-6->L+1 (4%)                   |
| 328.0612627   | 0.0628 | H-16->LUMO (77%)                                                | H-20->LUMO (4%), H-19->LUMO (6%), H-8->L+1 (3%)                                                   |
| 327.636470092 | 0.0077 | H-8->L+1 (45%), H-7->L+1 (16%)                                  | H-18->LUMO (7%), H-17->LUMO (6%), H-16->LUMO (2%), H-15->LUMO (5%), H-11->L+1 (5%), H-9->L+1 (3%) |
| 325.622946245 | 0.0322 | H-20->LUMO (15%), H-19->LUMO (52%)                              | H-21->LUMO (3%), H-16->LUMO (7%), H-15->LUMO (3%), H-14->LUMO (3%)                                |
| 322.791442365 | 0.0139 | H-18->LUMO (73%)                                                | H-19->LUMO (3%), H-17->LUMO (7%), H-15->LUMO (2%), H-8->L+1 (3%)                                  |
| 320.687478693 | 0.0089 | H-12->L+1 (11%), H-9->L+1 (29%), H-8->L+1 (16%), H-7->L+1 (24%) | H-11->L+1 (3%), H-10->L+1 (4%)                                                                    |
| 316.100739393 | 0.0071 | H-20->LUMO (49%), H-19->LUMO (27%)                              | H-21->LUMO (2%), H-12->L+1 (2%), H-11->L+1 (8%), H-8->L+1 (2%)                                    |
| 314.098733342 | 0.0333 | H-20->LUMO (13%), H-12->L+1 (17%), H-11->L+1 (43%)              | H-21->LUMO (3%), H-13->L+1 (3%), H-8->L+1 (7%)                                                    |
| 311.800103139 | 0.0037 | H-12->L+1 (29%), H-11->L+1 (20%), H-10->L+1 (33%)               | H-9->L+1 (8%)                                                                                     |

|               |        |                                                                                      |                                                                                               |
|---------------|--------|--------------------------------------------------------------------------------------|-----------------------------------------------------------------------------------------------|
| 310.72175082  | 0.003  | H-12->L+1 (11%), H-10->L+1 (52%), H-9->L+1 (21%)                                     | H-17->L+1 (3%), H-8->L+1 (4%)                                                                 |
| 305.455020971 | 0.0106 | H-14->L+1 (10%), H-13->L+1 (62%)                                                     | H-17->L+1 (5%), H-15->L+1 (4%), H-11->L+1 (5%), H-9->L+1 (3%), HOMO->L+2 (4%)                 |
| 299.710387285 | 0.018  | H-17->L+1 (13%), H-15->L+1 (33%), H-13->L+1 (17%)                                    | H-21->LUMO (5%), H-14->L+1 (6%), H-12->L+1 (7%), H-1->L+2 (3%), HOMO->L+2 (8%)                |
| 299.204095304 | 0.0179 | H-21->LUMO (14%), H-17->L+1 (12%), H-16->L+1 (32%), H-14->L+1 (13%), HOMO->L+2 (11%) | H-15->L+1 (9%)                                                                                |
| 297.039274107 | 0.0736 | H-17->L+1 (16%), H-14->L+1 (18%), HOMO->L+2 (32%)                                    | H-18->L+1 (6%), H-16->L+1 (9%), H-15->L+1 (2%), H-13->L+1 (2%), H-12->L+1 (4%), H-1->L+2 (2%) |
| 296.364749641 | 0.0623 | H-21->LUMO (11%), H-16->L+1 (14%), H-14->L+1 (46%), HOMO->L+2 (16%)                  | H-13->L+1 (3%), H-1->L+2 (5%)                                                                 |
| 294.905553999 | 0.0233 | H-18->L+1 (14%), H-16->L+1 (17%), H-15->L+1 (30%), HOMO->L+2 (19%)                   | H-19->L+1 (2%), H-17->L+1 (5%), H-12->L+1 (3%), H-1->L+2 (3%)                                 |
| 294.087129705 | 0.0416 | H-21->LUMO (13%), H-16->L+1 (15%), H-1->L+2 (49%)                                    | H-20->L+1 (4%), H-17->L+1 (5%), HOMO->L+2 (3%)                                                |
| 292.850681466 | 0.0164 | H-18->L+1 (53%), H-17->L+1 (10%)                                                     | H-22->LUMO (4%), H-21->LUMO (7%), H-19->L+1 (5%), H-16->L+1 (5%), H-15->L+1 (7%)              |
| 290.333910201 | 0.0888 | H-22->LUMO (12%), H-21->LUMO (32%), H-17->L+1 (20%), H-1->L+2 (13%)                  | H-20->LUMO (3%), H-20->L+1 (3%), H-19->L+1 (5%), H-15->L+1 (3%)                               |
| 287.793210492 | 0.0698 | H-22->LUMO (20%), H-20->L+1 (11%), H-19->L+1 (28%), H-1->L+2 (18%)                   | H-21->LUMO (5%), H-20->LUMO (2%), H-18->L+1 (4%)                                              |
| 286.688540274 | 0.0272 | H-22->LUMO (46%), H-19->L+1 (36%)                                                    | H-19->LUMO (2%), H-18->L+1 (9%)                                                               |
| 280.431088872 | 0.0163 | H-20->L+1 (70%), H-19->L+1 (14%)                                                     | H-22->LUMO (6%)                                                                               |
| 271.680675371 | 0.0198 | HOMO->L+3 (83%)                                                                      | H-21->L+1 (2%), HOMO->L+4 (7%)                                                                |
| 269.648092676 | 0.0138 | H-23->LUMO (51%), H-21->L+1 (35%)                                                    | HOMO->L+3 (4%)                                                                                |
| 267.784434152 | 0.016  | H-21->L+1 (10%), HOMO->L+4 (70%)                                                     | H-1->L+4 (3%), HOMO->L+3 (4%)                                                                 |
| 267.328301628 | 0.0488 | H-23->LUMO (23%), H-21->L+1 (20%), H-1->L+3 (17%), HOMO->L+4 (10%)                   | H-22->L+1 (4%), H-2->L+2 (6%), HOMO->L+3 (2%), HOMO->L+5 (2%)                                 |

**Table S6.** Selected TD-DFT calculated oscillator strengths and compositions of the major electronic transitions of **10**.

| Wavelength (nm) | Osc. Strength | Major contributions                                               | Minor contributions                                                           |
|-----------------|---------------|-------------------------------------------------------------------|-------------------------------------------------------------------------------|
| 551.531107706   | 0.1065        | HOMO->LUMO (81%)                                                  | H-1->LUMO (5%), H-1->L+1 (9%)                                                 |
| 511.507046546   | 0.1001        | H-1->LUMO (59%), HOMO->L+1 (32%)                                  | HOMO->LUMO (6%)                                                               |
| 465.004661937   | 0.1823        | H-2->LUMO (34%), H-1->LUMO (17%), HOMO->L+1 (29%)                 | H-3->LUMO (8%), H-2->L+1 (4%), H-1->L+1 (2%)                                  |
| 451.426153331   | 0.133         | H-2->LUMO (33%), H-1->L+1 (20%), HOMO->L+1 (22%)                  | H-4->LUMO (7%), H-3->L+1 (5%), H-1->LUMO (6%)                                 |
| 448.357115005   | 0.0618        | H-3->LUMO (87%)                                                   | H-1->LUMO (3%), HOMO->L+1 (4%)                                                |
| 428.270096761   | 0.033         | H-4->LUMO (65%), H-2->LUMO (20%)                                  | H-3->LUMO (3%), H-1->L+1 (7%)                                                 |
| 412.400854884   | 0.2147        | H-5->LUMO (72%), H-1->L+1 (16%)                                   | H-12->LUMO (3%), HOMO->LUMO (3%)                                              |
| 392.877219761   | 0.5948        | H-5->LUMO (11%), H-3->L+1 (18%), H-2->L+1 (22%), H-1->L+1 (19%)   | H-6->LUMO (3%), H-4->LUMO (8%), H-2->LUMO (7%), HOMO->LUMO (3%)               |
| 392.392293611   | 0.3789        | H-3->L+1 (18%), H-2->L+1 (36%), H-1->L+1 (19%)                    | H-5->LUMO (6%), H-4->LUMO (9%), HOMO->LUMO (3%)                               |
| 387.547490036   | 0.0159        | H-6->LUMO (80%)                                                   | H-9->LUMO (3%), H-5->LUMO (3%), H-3->L+1 (5%), H-2->L+1 (3%)                  |
| 384.733423361   | 0.0426        | H-7->LUMO (55%), H-2->L+1 (12%)                                   | H-12->LUMO (6%), H-11->LUMO (2%), H-6->LUMO (3%), H-3->L+1 (8%)               |
| 380.319610467   | 0.4653        | H-12->LUMO (12%), H-7->LUMO (11%), H-3->L+1 (36%), H-2->L+1 (16%) | H-9->LUMO (5%), H-8->LUMO (4%), H-5->LUMO (3%), HOMO->L+1 (3%)                |
| 371.343575573   | 0.2581        | H-5->L+1 (17%), H-4->L+1 (68%)                                    | H-12->L+1 (3%)                                                                |
| 364.595050909   | 0.0736        | H-9->LUMO (19%), H-8->LUMO (22%), H-5->L+1 (27%)                  | H-12->LUMO (5%), H-7->LUMO (6%), H-6->LUMO (5%), H-4->L+1 (4%), H-2->L+1 (3%) |
| 361.459412298   | 0.1265        | H-8->LUMO (32%), H-5->L+1 (35%), H-4->L+1 (14%)                   | H-12->LUMO (5%), H-9->LUMO (4%)                                               |
| 355.143630982   | 0.0296        | H-9->LUMO (52%), H-8->LUMO (35%)                                  | H-5->L+1 (3%), H-4->L+1 (2%)                                                  |
| 351.090765737   | 0.0969        | H-12->LUMO (30%), H-11-                                           | H-17->LUMO (2%), H-15-                                                        |

|               |        |                                                                                        |                                                                                                                              |
|---------------|--------|----------------------------------------------------------------------------------------|------------------------------------------------------------------------------------------------------------------------------|
|               |        | >LUMO (16%), H-7->LUMO (20%), H-5->L+1 (11%)                                           | >LUMO (3%), H-13->LUMO (4%), H-10->LUMO (3%)                                                                                 |
| 342.924057564 | 0.0207 | H-11->LUMO (40%), H-10->LUMO (23%)                                                     | H-15->LUMO (3%), H-14->LUMO (9%), H-13->LUMO (9%), H-12->LUMO (6%)                                                           |
| 341.959326509 | 0.0108 | H-7->L+1 (47%)                                                                         | H-12->LUMO (6%), H-12->L+1 (8%), H-11->LUMO (4%), H-9->LUMO (2%), H-9->L+1 (4%), H-8->L+1 (9%), H-6->L+1 (7%), H-4->L+1 (2%) |
| 341.394369062 | 0.0193 | H-11->LUMO (20%), H-10->LUMO (46%), H-6->L+1 (24%)                                     | H-9->LUMO (3%)                                                                                                               |
| 338.939838743 | 0.0041 | H-10->LUMO (23%), H-6->L+1 (51%)                                                       | H-15->LUMO (4%), H-11->LUMO (4%), H-9->LUMO (2%), H-7->L+1 (5%)                                                              |
| 336.675699267 | 0.0388 | H-15->LUMO (15%), H-13->LUMO (34%), H-12->LUMO (15%)                                   | H-14->LUMO (5%), H-12->L+1 (3%), H-11->LUMO (3%), H-9->LUMO (2%), H-7->L+1 (8%), H-6->L+1 (7%)                               |
| 333.479095759 | 0.0042 | H-15->LUMO (29%), H-14->LUMO (12%), H-13->LUMO (43%)                                   | H-18->LUMO (2%), H-16->LUMO (3%)                                                                                             |
| 332.611312942 | 0.0465 | H-15->LUMO (24%), H-14->LUMO (63%)                                                     | H-11->LUMO (3%)                                                                                                              |
| 328.765891526 | 0.0061 | H-16->LUMO (59%)                                                                       | H-20->LUMO (9%), H-18->LUMO (9%), H-15->LUMO (5%), H-8->L+1 (2%)                                                             |
| 325.187381678 | 0.0301 | H-16->LUMO (12%), H-9->L+1 (14%), H-8->L+1 (39%), H-7->L+1 (11%)                       | H-20->LUMO (4%), H-19->LUMO (3%), H-11->LUMO (2%), H-6->L+1 (3%)                                                             |
| 323.203756451 | 0.0341 | H-20->LUMO (18%), H-19->LUMO (11%), H-18->LUMO (16%), H-16->LUMO (16%), H-8->L+1 (15%) | H-21->LUMO (4%), H-17->LUMO (8%), H-7->L+1 (5%)                                                                              |
| 320.52167161  | 0.0029 | H-17->LUMO (64%)                                                                       | H-19->LUMO (2%), H-18->LUMO (5%), H-15->LUMO (7%), H-12->L+1 (8%), H-9->L+1 (2%)                                             |
| 316.625448215 | 0.0035 | H-17->LUMO (11%), H-12->L+1 (24%), H-9->L+1 (23%), H-8->L+1 (19%)                      | H-18->LUMO (4%), H-7->L+1 (6%)                                                                                               |
| 315.7947913   | 0.0292 | H-12->L+1 (18%), H-9->L+1 (39%)                                                        | H-20->LUMO (2%), H-15->L+1 (4%), H-13->L+1 (6%), H-11->L+1 (4%), H-8->L+1 (6%), H-7->L+1 (5%)                                |
| 314.872493428 | 0.0023 | H-20->LUMO (14%), H-19-                                                                | H-17->LUMO (3%)                                                                                                              |

|               |        |                                                                    |                                                                                                |
|---------------|--------|--------------------------------------------------------------------|------------------------------------------------------------------------------------------------|
|               |        | >LUMO (17%), H-18->LUMO (53%)                                      |                                                                                                |
| 309.503964183 | 0.003  | H-20->LUMO (33%), H-19->LUMO (55%)                                 |                                                                                                |
| 306.118692934 | 0.029  | H-11->L+1 (23%), H-10->L+1 (60%)                                   | H-14->L+1 (5%)                                                                                 |
| 304.382670101 | 0.0072 | H-15->L+1 (17%), H-12->L+1 (12%), H-11->L+1 (21%), H-10->L+1 (16%) | H-21->LUMO (4%), H-16->L+1 (5%), H-14->L+1 (4%), H-13->L+1 (3%), H-9->L+1 (8%), HOMO->L+2 (3%) |
| 303.317822224 | 0.0063 | H-15->L+1 (19%), H-14->L+1 (11%), H-11->L+1 (39%), H-10->L+1 (11%) | H-21->LUMO (2%), H-13->L+1 (8%)                                                                |
| 301.283517234 | 0.0063 | H-15->L+1 (30%), H-14->L+1 (45%)                                   | H-21->LUMO (8%), H-16->L+1 (3%), H-13->L+1 (2%), H-10->L+1 (5%)                                |
| 299.442562522 | 0.0049 | H-14->L+1 (15%), H-13->L+1 (64%)                                   | H-16->L+1 (2%), H-15->L+1 (6%), H-12->L+1 (6%)                                                 |
| 297.745474442 | 0.0795 | H-21->LUMO (30%), H-16->L+1 (10%), HOMO->L+2 (33%)                 | H-15->L+1 (2%), H-14->L+1 (2%), H-13->L+1 (4%), H-1->L+2 (8%)                                  |
| 295.813215499 | 0.101  | H-21->LUMO (11%), HOMO->L+2 (54%)                                  | H-17->L+1 (7%), H-16->L+1 (8%), H-14->L+1 (5%), H-13->L+1 (4%), H-1->L+2 (3%)                  |
| 293.808367526 | 0.0247 | H-21->LUMO (16%), H-16->L+1 (53%)                                  | H-20->LUMO (3%), H-17->L+1 (7%), H-15->L+1 (4%), H-14->L+1 (5%), H-12->L+1 (3%), H-1->L+2 (5%) |
| 292.774612761 | 0.0115 | H-22->LUMO (58%), H-1->L+2 (17%)                                   | H-20->L+1 (7%), H-19->L+1 (3%)                                                                 |
| 290.59249288  | 0.0142 | H-22->LUMO (10%), H-18->L+1 (30%), H-17->L+1 (31%)                 | H-20->L+1 (3%), H-16->L+1 (5%), H-15->L+1 (7%), H-1->L+2 (5%)                                  |
| 288.295105363 | 0.156  | H-22->LUMO (14%), H-21->LUMO (10%), H-1->L+2 (49%)                 | H-20->LUMO (3%), H-18->L+1 (3%), H-17->L+1 (5%)                                                |
| 286.496425299 | 0.0245 | H-19->L+1 (13%), H-18->L+1 (30%), H-17->L+1 (28%)                  | H-22->LUMO (3%), H-20->L+1 (9%), H-16->L+1 (4%), H-1->L+2 (6%)                                 |
| 282.920368328 | 0.0051 | H-19->L+1 (49%), H-18->L+1 (18%), H-17->L+1 (10%)                  | H-21->L+1 (2%), H-20->L+1 (9%), H-12->L+1 (2%)                                                 |
| 279.099099593 | 0.0049 | H-20->L+1 (58%), H-19->L+1 (26%)                                   | H-18->L+1 (7%)                                                                                 |
| 274.933903256 | 0.0236 | HOMO->L+3 (89%)                                                    | H-3->L+3 (2%), H-1->L+3 (2%)                                                                   |
| 272.63654018  | 0.0118 | HOMO->L+4 (82%)                                                    | H-21->L+1 (8%)                                                                                 |
| 270.755138479 | 0.037  | H-23->LUMO (16%), H-21->L+1 (54%)                                  | H-22->L+1 (3%), H-20->L+1 (5%), HOMO->L+3 (2%), HOMO->L+4 (7%), HOMO-                          |

|               |        |                                                   |           |
|---------------|--------|---------------------------------------------------|-----------|
|               |        |                                                   | >L+5 (3%) |
| 269.595322821 | 0.0203 | H-23->LUMO (13%), H-1->L+3 (21%), HOMO->L+5 (56%) |           |

**Table S7.** Selected TD-DFT calculated oscillator strengths and compositions of the major electronic transitions of **11**.

| Wavelength (nm) | Osc. Strength | Major contributions                                              | Minor contributions                                                                                              |
|-----------------|---------------|------------------------------------------------------------------|------------------------------------------------------------------------------------------------------------------|
| 540.259675856   | 0.1413        | H-1->L+1 (10%), HOMO->LUMO (73%)                                 | H-1->LUMO (9%), HOMO->L+1 (5%)                                                                                   |
| 513.15836684    | 0.1078        | H-1->LUMO (54%), HOMO->LUMO (13%), HOMO->L+1 (30%)               |                                                                                                                  |
| 453.490098801   | 0.3695        | H-2->LUMO (11%), H-1->LUMO (24%), HOMO->L+1 (48%)                | H-4->L+1 (4%), H-3->LUMO (6%), H-2->L+1 (3%)                                                                     |
| 435.827450127   | 0.1217        | H-3->LUMO (17%), H-2->LUMO (33%), H-1->L+1 (25%)                 | H-5->LUMO (5%), H-4->LUMO (8%), H-4->L+1 (3%), HOMO->L+1 (4%)                                                    |
| 427.384326137   | 0.104         | H-3->LUMO (31%), H-2->LUMO (45%), H-1->L+1 (16%)                 | H-4->LUMO (4%)                                                                                                   |
| 420.856052316   | 0.1308        | H-4->LUMO (71%)                                                  | H-3->LUMO (5%), H-2->LUMO (8%), H-1->LUMO (3%), H-1->L+1 (4%), HOMO->L+1 (3%)                                    |
| 404.952127943   | 0.5744        | H-5->LUMO (47%), H-1->L+1 (23%)                                  | H-12->LUMO (4%), H-4->LUMO (5%), H-3->LUMO (4%), HOMO->LUMO (6%)                                                 |
| 395.761596694   | 0.4085        | H-5->LUMO (36%), H-3->LUMO (27%), H-1->L+1 (12%)                 | H-6->LUMO (4%), H-4->LUMO (7%), H-2->L+1 (7%), HOMO->LUMO (2%), HOMO->L+1 (2%)                                   |
| 383.389075148   | 0.4262        | H-2->L+1 (70%)                                                   | H-12->LUMO (3%), H-6->LUMO (5%), H-5->LUMO (4%), H-4->L+1 (3%), H-3->LUMO (3%), H-3->L+1 (3%), H-1->L+1 (2%)     |
| 381.93639644    | 0.0079        | H-9->LUMO (17%), H-6->LUMO (48%)                                 | H-12->LUMO (3%), H-11->LUMO (5%), H-10->LUMO (3%), H-8->LUMO (5%), H-7->LUMO (2%), H-5->LUMO (3%), H-2->L+1 (6%) |
| 376.977691667   | 0.0291        | H-9->LUMO (17%), H-6->LUMO (33%), H-4->L+1 (11%), H-3->L+1 (12%) | H-12->LUMO (4%), H-11->LUMO (3%), H-10->LUMO (3%), H-8->LUMO (2%), H-7->LUMO (6%)                                |

|               |        |                                                                    |                                                                                                                                              |
|---------------|--------|--------------------------------------------------------------------|----------------------------------------------------------------------------------------------------------------------------------------------|
| 373.435116449 | 0.0721 | H-4->L+1 (23%), H-3->L+1 (45%)                                     | H-9->LUMO (9%), H-7->LUMO (4%), H-6->LUMO (5%)                                                                                               |
| 369.980582532 | 0.3586 | H-5->L+1 (11%), H-4->L+1 (42%), H-3->L+1 (22%), H-2->L+1 (10%)     | H-12->L+1 (2%), HOMO->L+1 (2%)                                                                                                               |
| 359.655942367 | 0.0402 | H-5->L+1 (63%)                                                     | H-12->LUMO (4%), H-8->LUMO (2%), H-7->LUMO (7%), H-4->L+1 (5%), H-3->L+1 (8%)                                                                |
| 359.426563305 | 0.003  | H-8->LUMO (29%), H-7->LUMO (43%)                                   | H-13->LUMO (5%), H-12->LUMO (3%), H-5->L+1 (9%)                                                                                              |
| 357.529825861 | 0.0232 | H-9->LUMO (24%), H-8->LUMO (41%), H-7->LUMO (27%)                  |                                                                                                                                              |
| 349.931396269 | 0.0123 | H-11->LUMO (51%), H-10->LUMO (14%), H-9->LUMO (20%)                | H-8->LUMO (5%), H-5->L+1 (3%)                                                                                                                |
| 349.270925157 | 0.0045 | H-11->LUMO (20%), H-10->LUMO (73%)                                 | H-12->LUMO (3%)                                                                                                                              |
| 344.24753724  | 0.0359 | H-13->LUMO (23%), H-12->LUMO (16%), H-6->L+1 (17%)                 | H-18->LUMO (2%), H-16->LUMO (2%), H-11->L+1 (2%), H-9->L+1 (7%), H-8->LUMO (6%), H-8->L+1 (2%), H-7->LUMO (6%), H-3->L+1 (2%)                |
| 339.785121577 | 0.0408 | H-12->LUMO (20%), H-9->L+1 (25%)                                   | H-13->LUMO (2%), H-12->L+1 (6%), H-11->LUMO (4%), H-11->L+1 (7%), H-10->L+1 (4%), H-8->L+1 (3%), H-7->L+1 (6%), H-6->L+1 (4%), H-5->L+1 (8%) |
| 339.106703715 | 0.008  | H-13->LUMO (28%), H-6->L+1 (52%)                                   | H-14->LUMO (3%), H-12->LUMO (3%), H-8->LUMO (2%)                                                                                             |
| 336.091604804 | 0.0219 | H-13->LUMO (12%), H-12->LUMO (21%), H-9->L+1 (11%), H-6->L+1 (20%) | H-17->LUMO (3%), H-14->LUMO (8%), H-12->L+1 (3%), H-7->L+1 (3%)                                                                              |
| 330.333820937 | 0.039  | H-14->LUMO (11%), HOMO->L+2 (36%), HOMO->L+3 (37%)                 | H-17->LUMO (3%), H-15->LUMO (4%)                                                                                                             |
| 327.048781356 | 0.0436 | H-15->LUMO (10%), HOMO->L+3 (22%), HOMO->L+4 (19%)                 | H-18->LUMO (8%), H-16->LUMO (3%), H-14->LUMO (6%), H-12->LUMO (4%), H-8->L+1 (3%), H-7->L+1 (3%), H-1->L+2 (3%), H-1->L+4 (3%)               |
| 326.824633626 | 0.1394 | H-14->LUMO (11%), HOMO->L+2 (24%), HOMO->L+4 (31%)                 | H-18->LUMO (3%), H-17->LUMO (3%), H-15->LUMO (5%), H-12->LUMO (2%), H-                                                                       |

|               |        |                                                                       |                                                                                                                   |
|---------------|--------|-----------------------------------------------------------------------|-------------------------------------------------------------------------------------------------------------------|
|               |        |                                                                       | 1->L+3 (3%), HOMO->L+3 (2%)                                                                                       |
| 326.102559212 | 0.0692 | HOMO->L+2 (31%), HOMO->L+3 (21%), HOMO->L+4 (37%)                     | HOMO->L+5 (5%)                                                                                                    |
| 324.379135085 | 0.0307 | H-9->L+1 (23%), H-8->L+1 (24%), H-7->L+1 (31%)                        | HOMO->L+3 (9%)                                                                                                    |
| 322.623453063 | 0.0062 | H-15->LUMO (10%), H-14->LUMO (26%), H-13->LUMO (14%), H-7->L+1 (12%)  | H-18->LUMO (6%), H-16->LUMO (9%), H-8->L+1 (7%), HOMO->L+3 (3%)                                                   |
| 320.944818959 | 0.0082 | H-8->L+1 (38%), H-7->L+1 (23%)                                        | H-18->LUMO (3%), H-15->LUMO (8%), H-14->LUMO (8%), H-13->L+1 (6%), HOMO->L+5 (3%)                                 |
| 320.23192141  | 0.1179 | H-1->L+2 (21%), HOMO->L+5 (62%)                                       | H-1->L+4 (4%), HOMO->L+4 (5%)                                                                                     |
| 318.095782159 | 0.0255 | H-1->L+2 (37%), H-1->L+3 (18%), HOMO->L+5 (12%)                       | H-16->LUMO (6%), H-15->LUMO (2%), H-1->L+4 (7%), H-1->L+5 (4%)                                                    |
| 316.552692349 | 0.0033 | H-16->LUMO (11%), H-1->L+3 (44%)                                      | H-15->LUMO (9%), H-12->L+1 (6%), H-10->L+1 (8%), H-7->L+1 (4%), H-1->L+2 (5%)                                     |
| 316.39920638  | 0.0215 | H-16->LUMO (24%), H-15->LUMO (13%), H-1->L+2 (13%), H-1->L+3 (19%)    | H-17->LUMO (3%), H-14->LUMO (5%), H-1->L+4 (2%), HOMO->L+5 (9%)                                                   |
| 314.544975549 | 0.004  | H-17->LUMO (20%), H-15->LUMO (18%), H-10->L+1 (23%)                   | H-18->LUMO (4%), H-14->LUMO (2%), H-11->L+1 (8%), H-9->L+1 (7%), H-8->L+1 (4%), H-7->L+1 (2%), H-1->L+3 (3%)      |
| 313.884032942 | 0.0186 | H-17->LUMO (13%), H-10->L+1 (21%), H-1->L+4 (27%)                     | H-19->LUMO (2%), H-18->LUMO (3%), H-16->LUMO (4%), H-15->LUMO (6%), H-14->LUMO (8%), H-9->L+1 (2%), H-1->L+3 (4%) |
| 313.392126314 | 0.031  | H-10->L+1 (21%), H-1->L+4 (46%)                                       | H-17->LUMO (6%), H-15->LUMO (3%), H-13->L+1 (3%), H-1->L+2 (7%)                                                   |
| 311.957007378 | 0.0185 | H-18->LUMO (11%), H-11->L+1 (45%), H-10->L+1 (14%)                    | H-16->LUMO (7%), H-12->L+1 (5%), H-11->LUMO (3%), H-9->L+1 (5%), H-8->L+1 (2%)                                    |
| 310.138812348 | 0.0041 | H-18->LUMO (25%), H-17->LUMO (30%), H-16->LUMO (21%), H-11->L+1 (13%) | H-9->L+1 (2%), H-1->L+5 (2%)                                                                                      |
| 309.650831699 | 0.018  | H-13->L+1 (13%), H-1->L+5                                             |                                                                                                                   |



|               |        |                                                                |                                                                                                                               |
|---------------|--------|----------------------------------------------------------------|-------------------------------------------------------------------------------------------------------------------------------|
|               |        | (71%)                                                          |                                                                                                                               |
| 307.378503104 | 0.0363 | H-19->LUMO (13%), H-13->L+1 (17%), H-12->L+1 (27%)             | H-18->LUMO (9%), H-11->L+1 (3%), H-8->L+1 (3%), H-7->L+1 (2%), H-1->L+5 (6%)                                                  |
| 306.37588468  | 0.1441 | H-19->LUMO (12%), H-13->L+1 (29%), H-12->L+1 (15%)             | H-14->L+1 (7%), H-11->L+1 (5%), H-8->L+1 (2%), H-1->L+2 (4%), H-1->L+5 (8%)                                                   |
| 305.274518669 | 0.05   | H-19->LUMO (44%), H-12->L+1 (25%)                              | H-20->LUMO (3%), H-18->LUMO (5%), H-17->LUMO (5%), H-11->L+1 (5%)                                                             |
| 300.312929665 | 0.0022 | H-20->LUMO (73%), H-19->LUMO (10%)                             | H-14->L+1 (5%)                                                                                                                |
| 295.277794213 | 0.068  | H-14->L+1 (65%)                                                | H-21->LUMO (6%), H-20->LUMO (5%), H-17->L+1 (3%), H-15->L+1 (5%), H-13->L+1 (6%)                                              |
| 292.215685056 | 0.007  | H-16->L+1 (28%), H-15->L+1 (28%)                               | H-21->LUMO (6%), H-18->L+1 (5%), H-17->L+1 (8%), H-14->L+1 (6%), H-13->L+1 (7%)                                               |
| 290.429123945 | 0.0056 | H-17->L+1 (15%), H-16->L+1 (40%)                               | H-22->LUMO (4%), H-19->L+1 (3%), H-18->L+1 (4%), H-15->L+1 (6%), H-14->L+1 (3%), H-13->L+1 (2%), H-4->L+2 (6%), H-4->L+3 (3%) |
| 289.892662939 | 0.0276 | H-21->LUMO (47%), H-18->L+1 (12%)                              | H-14->L+1 (3%), H-3->L+4 (4%), H-2->L+2 (2%), H-2->L+4 (8%), H-2->L+5 (3%)                                                    |
| 288.798753843 | 0.0168 | H-4->L+2 (21%), H-4->L+3 (21%), H-2->L+3 (15%), H-2->L+4 (12%) | H-21->LUMO (3%), H-16->L+1 (6%), H-14->L+1 (2%), H-3->L+4 (4%), H-2->L+5 (3%)                                                 |
| 288.563499074 | 0.0665 | H-4->L+3 (14%), H-2->L+2 (12%), H-2->L+4 (24%)                 | H-21->LUMO (8%), H-18->L+1 (7%), H-4->L+2 (4%), H-3->L+4 (8%), H-3->L+5 (3%), H-2->L+5 (5%)                                   |
| 286.914106894 | 0.0421 | H-21->LUMO (11%), H-18->L+1 (21%), H-17->L+1 (37%)             | H-20->LUMO (3%), H-16->L+1 (6%), H-13->L+1 (3%), HOMO->L+6 (3%)                                                               |

**Table S8.** Selected TD-DFT calculated oscillator strengths and compositions of the major electronic transitions of **12**.

| Wavelength (nm) | Osc. Strength | Major contributions                                                  | Minor contributions                                                                                            |
|-----------------|---------------|----------------------------------------------------------------------|----------------------------------------------------------------------------------------------------------------|
| 582.085413203   | 0.0694        | HOMO->LUMO (92%)                                                     | H-1->L+1 (3%)                                                                                                  |
| 523.140054904   | 0.0657        | H-1->LUMO (53%), HOMO->L+1 (38%)                                     | H-2->LUMO (5%)                                                                                                 |
| 501.128462925   | 0.0274        | H-2->LUMO (84%)                                                      | H-4->LUMO (2%), H-3->LUMO (4%), HOMO->L+1 (2%)                                                                 |
| 486.7087737     | 0.1894        | H-3->LUMO (17%), H-1->LUMO (31%), HOMO->L+1 (39%)                    | H-5->LUMO (5%), H-4->L+1 (3%), H-3->L+1 (3%)                                                                   |
| 479.666484882   | 0.0402        | H-3->LUMO (66%), HOMO->L+1 (11%)                                     | H-4->LUMO (5%), H-2->LUMO (2%), H-1->L+1 (9%)                                                                  |
| 468.962073577   | 0.0255        | H-4->LUMO (62%), H-3->LUMO (10%), H-1->L+1 (18%)                     | H-5->LUMO (4%), H-1->LUMO (3%)                                                                                 |
| 453.888537898   | 0.0251        | H-5->LUMO (79%)                                                      | H-4->LUMO (8%), H-1->L+1 (3%), HOMO->L+1 (4%)                                                                  |
| 429.724778221   | 0.0512        | H-2->L+1 (80%), H-1->L+1 (10%)                                       | H-2->LUMO (2%)                                                                                                 |
| 411.96236381    | 0.298         | H-5->L+1 (18%), H-3->L+1 (13%), H-2->L+1 (13%), H-1->L+1 (28%)       | H-6->LUMO (3%), H-5->LUMO (6%), H-4->LUMO (5%), H-4->L+1 (9%)                                                  |
| 404.146922916   | 0.2152        | H-6->LUMO (10%), H-3->L+1 (69%)                                      | H-5->L+1 (6%), H-1->L+1 (6%)                                                                                   |
| 397.257907761   | 0.0652        | H-8->LUMO (18%), H-7->LUMO (11%), H-6->LUMO (42%), H-4->L+1 (11%)    | H-5->L+1 (5%), H-3->L+1 (4%)                                                                                   |
| 393.900727577   | 0.3058        | H-7->LUMO (42%), H-5->L+1 (38%)                                      | H-6->LUMO (3%), H-4->LUMO (3%), H-1->L+1 (5%)                                                                  |
| 386.773749102   | 0.4065        | H-7->LUMO (14%), H-6->LUMO (10%), H-4->L+1 (25%)                     | H-14->LUMO (6%), H-13->LUMO (9%), H-8->LUMO (5%), H-5->LUMO (2%), H-5->L+1 (4%), H-4->LUMO (3%), H-1->L+1 (8%) |
| 385.103876416   | 0.3609        | H-8->LUMO (16%), H-7->LUMO (13%), H-6->LUMO (15%), H-4->L+1 (28%)    | H-15->LUMO (2%), H-14->LUMO (3%), H-13->LUMO (4%), H-10->LUMO (3%), H-5->L+1 (8%), H-1->LUMO (2%)              |
| 373.277714925   | 0.7088        | H-8->LUMO (40%), H-6->LUMO (14%), H-5->L+1 (10%), H-4->L+1 (12%)     | H-7->LUMO (5%), H-3->L+1 (4%), H-1->L+1 (2%)                                                                   |
| 370.124165658   | 0.0741        | H-14->LUMO (18%), H-13->LUMO (24%), H-8->LUMO (12%), H-7->LUMO (12%) | H-15->LUMO (8%), H-10->LUMO (7%), H-5->L+1 (3%), H-4->LUMO (3%)                                                |
| 354.869176863   | 0.0075        | H-9->LUMO (83%)                                                      | H-10->LUMO (6%), H-8->LUMO (2%), H-7->L+1 (2%)                                                                 |
| 352.047796616   | 0.0044        | H-11->LUMO (70%), H-10-                                              | H-9->LUMO (4%), H-8->L+1                                                                                       |

|               |        |                                                                                      |                                                                                |
|---------------|--------|--------------------------------------------------------------------------------------|--------------------------------------------------------------------------------|
|               |        | >LUMO (13%)                                                                          | (4%), H-6->L+1 (2%)                                                            |
| 351.838000545 | 0.0649 | H-11->LUMO (16%), H-10->LUMO (64%)                                                   | H-14->LUMO (3%), H-13->LUMO (5%), H-9->LUMO (4%)                               |
| 349.005469422 | 0.0096 | H-8->L+1 (19%), H-7->L+1 (25%), H-6->L+1 (36%)                                       | H-11->LUMO (5%), H-10->L+1 (2%)                                                |
| 346.256857632 | 0.0047 | H-14->LUMO (16%), H-12->LUMO (76%)                                                   |                                                                                |
| 344.735695849 | 0.0217 | H-7->L+1 (44%), H-6->L+1 (44%)                                                       |                                                                                |
| 342.412640538 | 0.0034 | H-14->LUMO (39%), H-13->LUMO (43%), H-12->LUMO (13%)                                 |                                                                                |
| 335.845797362 | 0.0032 | H-15->LUMO (78%)                                                                     | H-14->LUMO (5%), H-13->LUMO (5%), H-8->L+1 (3%)                                |
| 335.400619521 | 0.056  | H-13->L+1 (11%), H-8->L+1 (39%), H-7->L+1 (14%), H-6->L+1 (12%)                      | H-15->L+1 (3%), H-14->L+1 (6%), H-10->L+1 (2%)                                 |
| 331.739158271 | 0.0195 | H-20->LUMO (13%), H-16->LUMO (24%), H-14->L+1 (10%), H-13->L+1 (10%), H-8->L+1 (14%) | H-19->LUMO (5%), H-18->LUMO (2%), H-15->L+1 (4%)                               |
| 329.841690421 | 0.023  | H-16->LUMO (52%), H-14->L+1 (10%), H-13->L+1 (13%)                                   | H-15->L+1 (4%), H-8->L+1 (9%)                                                  |
| 328.104670827 | 0.0049 | H-17->LUMO (92%)                                                                     |                                                                                |
| 325.528902282 | 0.0021 | H-20->LUMO (24%), H-18->LUMO (25%), H-16->LUMO (18%)                                 | H-21->LUMO (6%), H-19->LUMO (9%), H-13->L+1 (3%), H-8->L+1 (3%)                |
| 321.052858802 | 0.0086 | H-20->LUMO (23%), H-18->LUMO (60%)                                                   | H-21->LUMO (6%), H-19->LUMO (3%)                                               |
| 318.275428089 | 0.0047 | H-19->LUMO (49%), H-11->L+1 (11%), H-9->L+1 (16%)                                    | H-21->LUMO (3%), H-20->LUMO (9%), H-10->L+1 (4%)                               |
| 316.601192544 | 0.014  | H-19->LUMO (22%), H-9->L+1 (57%)                                                     | H-20->LUMO (6%)                                                                |
| 315.810879065 | 0.0393 | H-11->L+1 (23%), H-10->L+1 (49%)                                                     | H-20->LUMO (3%), H-19->LUMO (3%), H-14->L+1 (3%), H-9->L+1 (8%), H-7->L+1 (2%) |
| 313.923770128 | 0.0109 | H-11->L+1 (50%), H-10->L+1 (35%)                                                     | H-21->LUMO (2%), H-13->L+1 (3%)                                                |
| 309.596706401 | 0.0028 | H-12->L+1 (69%)                                                                      | H-22->LUMO (5%), H-21->LUMO (8%), H-15->L+1 (3%), H-11->L+1 (4%)               |
| 305.929856669 | 0.0083 | H-22->LUMO (16%), H-14->L+1 (45%), H-13->L+1 (13%)                                   | H-21->LUMO (5%), H-15->L+1 (3%), H-12->L+1 (3%), H-9->L+1 (4%), HOMO->L+2 (7%) |

|               |        |                                                                     |                                                                                                                                                  |
|---------------|--------|---------------------------------------------------------------------|--------------------------------------------------------------------------------------------------------------------------------------------------|
| 305.628202756 | 0.0201 | H-22->LUMO (24%), H-14->L+1 (13%), H-13->L+1 (12%), HOMO->L+2 (28%) | H-21->LUMO (3%), H-18->LUMO (2%), H-15->L+1 (2%), H-12->L+1 (7%), H-9->L+1 (2%)                                                                  |
| 303.853036497 | 0.0943 | H-22->LUMO (12%), H-21->LUMO (15%), HOMO->L+2 (51%)                 | H-13->L+1 (4%), H-12->L+1 (6%), H-9->L+1 (2%)                                                                                                    |
| 301.76749504  | 0.0105 | H-15->L+1 (68%), H-13->L+1 (19%)                                    |                                                                                                                                                  |
| 301.628008788 | 0.1132 | H-22->LUMO (29%), H-21->LUMO (31%), H-1->L+2 (11%)                  | H-20->LUMO (8%), H-20->L+1 (2%), H-12->L+1 (3%), HOMO->L+2 (6%)                                                                                  |
| 294.737300937 | 0.0106 | H-16->L+1 (88%)                                                     | H-1->L+2 (6%)                                                                                                                                    |
| 294.485281013 | 0.0091 | H-18->L+1 (18%), H-17->L+1 (60%)                                    | H-20->L+1 (2%), H-15->L+1 (4%), H-1->L+2 (9%)                                                                                                    |
| 291.30255395  | 0.015  | H-18->L+1 (61%), H-17->L+1 (25%)                                    | H-22->L+1 (2%), H-20->L+1 (3%)                                                                                                                   |
| 290.776502761 | 0.1656 | H-1->L+2 (57%)                                                      | H-22->LUMO (2%), H-21->LUMO (8%), H-20->LUMO (3%), H-20->L+1 (2%), H-19->L+1 (4%), H-18->L+1 (4%), H-17->L+1 (5%), H-16->L+1 (3%), H-2->L+2 (3%) |
| 286.238469381 | 0.009  | H-20->L+1 (25%), H-19->L+1 (51%)                                    | H-21->L+1 (5%), H-1->L+2 (7%)                                                                                                                    |
| 282.334091661 | 0.0053 | H-20->L+1 (42%), H-19->L+1 (39%)                                    | H-22->L+1 (3%), H-21->L+1 (4%), H-18->L+1 (3%)                                                                                                   |
| 280.837621211 | 0.0683 | H-2->L+2 (84%)                                                      | H-22->L+1 (2%), H-1->L+2 (3%)                                                                                                                    |
| 277.997697285 | 0.0322 | H-3->L+2 (59%), HOMO->L+4 (13%)                                     | H-21->L+1 (6%), H-20->L+1 (2%), H-4->L+2 (2%), H-2->L+2 (2%), HOMO->L+3 (7%)                                                                     |
| 277.26411211  | 0.0132 | H-3->L+2 (19%), HOMO->L+4 (68%)                                     | H-18->L+1 (2%)                                                                                                                                   |
| 276.324841232 | 0.0143 | H-21->L+1 (11%), HOMO->L+3 (57%)                                    | H-22->L+1 (2%), H-3->L+2 (8%), HOMO->L+4 (5%), HOMO->L+5 (4%)                                                                                    |

**Table S9.** Selected TD-DFT calculated oscillator strengths and compositions of the major electronic transitions of **13**.

| Wavelength (nm) | Osc. Strength | Major contributions              | Minor contributions                           |
|-----------------|---------------|----------------------------------|-----------------------------------------------|
| 564.976956082   | 0.0951        | HOMO->LUMO (84%)                 | H-2->LUMO (2%), H-1->LUMO (4%), H-1->L+1 (6%) |
| 521.358197772   | 0.1008        | H-1->LUMO (61%), HOMO->L+1 (31%) | HOMO->LUMO (5%)                               |

|               |        |                                                                    |                                                                                                                               |
|---------------|--------|--------------------------------------------------------------------|-------------------------------------------------------------------------------------------------------------------------------|
| 485.546085813 | 0.076  | H-2->LUMO (68%), HOMO->L+1 (12%)                                   | H-3->L+1 (2%), H-1->LUMO (8%), H-1->L+1 (3%)                                                                                  |
| 465.022102664 | 0.1928 | H-3->LUMO (28%), H-2->LUMO (11%), H-1->LUMO (17%), HOMO->L+1 (34%) | H-3->L+1 (7%)                                                                                                                 |
| 462.38604092  | 0.0398 | H-3->LUMO (55%), H-1->L+1 (20%), HOMO->L+1 (10%)                   | H-4->LUMO (3%), H-3->L+1 (3%), H-2->LUMO (5%)                                                                                 |
| 435.689612441 | 0.0285 | H-4->LUMO (79%)                                                    | H-3->LUMO (6%), H-2->LUMO (3%), H-1->L+1 (6%)                                                                                 |
| 425.185847093 | 0.1163 | H-5->LUMO (72%), H-1->L+1 (12%)                                    | H-4->LUMO (5%), HOMO->LUMO (2%)                                                                                               |
| 412.318566718 | 0.074  | H-2->L+1 (87%)                                                     | H-3->L+1 (3%), H-2->LUMO (3%)                                                                                                 |
| 404.423762965 | 0.6346 | H-5->LUMO (17%), H-1->L+1 (37%)                                    | H-7->LUMO (5%), H-6->LUMO (9%), H-5->L+1 (3%), H-4->LUMO (5%), H-3->LUMO (4%), H-2->LUMO (3%), H-2->L+1 (5%), HOMO->LUMO (5%) |
| 399.704029828 | 0.0048 | H-7->LUMO (69%), H-6->LUMO (16%)                                   | H-8->LUMO (3%), H-5->LUMO (3%)                                                                                                |
| 392.939476475 | 0.0871 | H-7->LUMO (15%), H-6->LUMO (57%)                                   | H-11->LUMO (3%), H-5->L+1 (4%), H-4->L+1 (3%), H-3->L+1 (6%), H-1->L+1 (3%)                                                   |
| 385.151728782 | 0.4508 | H-11->LUMO (15%), H-8->LUMO (10%), H-3->L+1 (47%)                  | H-16->LUMO (3%), H-9->LUMO (4%), H-1->LUMO (3%), HOMO->L+1 (4%)                                                               |
| 383.638198565 | 0.3654 | H-11->LUMO (18%), H-8->LUMO (41%), H-3->L+1 (19%)                  | H-6->LUMO (8%)                                                                                                                |
| 380.447982486 | 0.0076 | H-11->LUMO (32%), H-8->LUMO (38%)                                  | H-16->LUMO (3%), H-9->LUMO (3%), H-7->LUMO (3%), H-5->L+1 (6%)                                                                |
| 375.641377362 | 0.2659 | H-5->L+1 (13%), H-4->L+1 (64%)                                     | H-6->LUMO (4%)                                                                                                                |
| 371.176819484 | 0.2024 | H-9->LUMO (40%), H-5->L+1 (27%), H-4->L+1 (14%)                    | H-16->LUMO (3%), H-10->LUMO (6%), H-1->L+1 (2%)                                                                               |
| 369.000574441 | 0.0031 | H-9->LUMO (43%), H-5->L+1 (34%)                                    | H-11->LUMO (7%), H-8->LUMO (2%), H-4->L+1 (9%)                                                                                |
| 365.099658448 | 0.0212 | H-10->LUMO (81%)                                                   | H-12->LUMO (3%), H-5->L+1 (5%)                                                                                                |
| 355.174152092 | 0.0182 | H-13->LUMO (17%), H-12->LUMO (56%)                                 | H-19->LUMO (3%), H-11->LUMO (4%), H-10->LUMO (4%), H-7->LUMO (2%), H-7->L+1 (2%)                                              |
| 348.838537539 | 0.0078 | H-13->LUMO (27%), H-12->LUMO (17%), H-7->L+1                       |                                                                                                                               |

|               |        |                                                    |                                                                                                                  |
|---------------|--------|----------------------------------------------------|------------------------------------------------------------------------------------------------------------------|
|               |        | (22%), H-6->L+1 (23%)                              |                                                                                                                  |
| 347.479591413 | 0.0259 | H-13->LUMO (38%), H-7->L+1 (45%)                   | H-12->LUMO (5%), H-6->L+1 (3%)                                                                                   |
| 344.534521792 | 0.0291 | H-7->L+1 (15%), H-6->L+1 (66%)                     | H-13->LUMO (4%), H-12->LUMO (3%), H-11->L+1 (3%)                                                                 |
| 340.924995222 | 0.0212 | H-16->LUMO (27%), H-11->L+1 (20%), H-8->L+1 (27%)  | H-19->LUMO (2%), H-11->LUMO (4%), H-9->L+1 (5%)                                                                  |
| 338.514151183 | 0.0525 | H-16->LUMO (26%), H-11->L+1 (30%), H-9->L+1 (11%)  | H-18->LUMO (3%), H-15->LUMO (4%), H-13->L+1 (2%), H-11->LUMO (2%), H-7->L+1 (5%)                                 |
| 337.528089217 | 0.0036 | H-14->LUMO (86%)                                   | H-11->L+1 (2%), H-8->L+1 (2%), H-7->L+1 (2%)                                                                     |
| 334.829979238 | 0.0177 | H-18->LUMO (15%), H-8->L+1 (44%)                   | H-20->LUMO (3%), H-16->LUMO (9%), H-15->LUMO (4%), H-14->LUMO (7%), H-11->L+1 (6%)                               |
| 334.22523456  | 0.0323 | H-15->LUMO (68%), H-8->L+1 (11%)                   | H-18->LUMO (5%), H-17->LUMO (4%), H-11->LUMO (2%)                                                                |
| 331.952323995 | 0.0187 | H-18->LUMO (18%), H-17->LUMO (22%), H-9->L+1 (37%) | H-20->LUMO (3%), H-15->LUMO (3%), H-11->L+1 (6%)                                                                 |
| 330.77446579  | 0.022  | H-18->LUMO (22%), H-15->LUMO (10%), H-9->L+1 (30%) | H-19->LUMO (3%), H-17->LUMO (7%), H-16->LUMO (5%), H-16->L+1 (2%), H-11->L+1 (3%), H-10->L+1 (4%), H-8->L+1 (7%) |
| 327.541259642 | 0.0034 | H-20->LUMO (18%), H-19->LUMO (56%)                 | H-17->LUMO (6%), H-15->LUMO (2%), H-12->LUMO (4%)                                                                |
| 326.360076368 | 0.0501 | H-18->LUMO (20%), H-17->LUMO (53%)                 | H-19->LUMO (3%), H-16->LUMO (7%), H-10->L+1 (3%), H-9->L+1 (4%)                                                  |
| 322.413712163 | 0.0047 | H-10->L+1 (74%)                                    | H-20->LUMO (4%), H-19->LUMO (3%), H-18->LUMO (4%), H-17->LUMO (2%)                                               |
| 321.510756456 | 0.0436 | H-20->LUMO (55%), H-19->LUMO (15%)                 | H-21->LUMO (3%), H-18->LUMO (5%), H-13->L+1 (4%), H-11->LUMO (2%), H-10->L+1 (4%), H-9->L+1 (2%)                 |
| 315.353019158 | 0.0285 | H-13->L+1 (33%), H-12->L+1 (39%)                   | H-20->LUMO (3%), H-19->L+1 (2%), H-11->L+1 (7%), H-10->L+1 (5%)                                                  |
| 311.572872144 | 0.0238 | H-13->L+1 (48%), H-12->L+1 (39%)                   | H-16->L+1 (3%)                                                                                                   |
| 304.951651652 | 0.0005 | H-16->L+1 (59%)                                    | H-15->L+1 (4%), H-14->L+1                                                                                        |

|               |        |                                                                     |                                                                                 |
|---------------|--------|---------------------------------------------------------------------|---------------------------------------------------------------------------------|
|               |        |                                                                     | (8%), H-12->L+1 (4%), H-11->L+1 (7%), H-10->L+1 (2%), HOMO->L+2 (9%)            |
| 300.830283429 | 0.0686 | H-14->L+1 (47%), HOMO->L+2 (33%)                                    | H-15->L+1 (9%), H-1->L+2 (2%)                                                   |
| 299.536608553 | 0.0516 | H-16->L+1 (13%), H-14->L+1 (37%), HOMO->L+2 (30%)                   | H-19->L+1 (6%), H-18->L+1 (3%)                                                  |
| 297.666841958 | 0.0251 | H-15->L+1 (59%), HOMO->L+2 (18%)                                    | H-21->LUMO (7%), H-19->L+1 (5%), H-12->L+1 (2%)                                 |
| 296.797512836 | 0.0286 | H-21->LUMO (27%), H-17->L+1 (22%), H-15->L+1 (12%)                  | H-19->L+1 (8%), H-18->L+1 (8%), H-16->L+1 (5%), H-14->L+1 (3%), H-1->L+2 (9%)   |
| 295.545262359 | 0.0098 | H-19->L+1 (14%), H-17->L+1 (58%), H-1->L+2 (12%)                    | H-22->LUMO (4%), H-15->L+1 (5%)                                                 |
| 292.802269536 | 0.0358 | H-20->L+1 (10%), H-19->L+1 (35%), H-1->L+2 (31%)                    | H-21->LUMO (4%), H-16->L+1 (3%), H-15->L+1 (2%), H-12->L+1 (2%), HOMO->L+2 (4%) |
| 291.59715189  | 0.0113 | H-18->L+1 (78%)                                                     | H-21->LUMO (4%), H-20->L+1 (3%), H-19->L+1 (5%)                                 |
| 289.007442919 | 0.1233 | H-22->LUMO (11%), H-21->LUMO (44%), H-17->L+1 (12%), H-1->L+2 (18%) | H-20->LUMO (4%), H-19->L+1 (5%)                                                 |
| 288.59708343  | 0.0704 | H-22->LUMO (62%), H-1->L+2 (16%)                                    | H-20->L+1 (7%), H-19->LUMO (3%)                                                 |
| 283.043085134 | 0.0143 | H-22->LUMO (12%), H-20->L+1 (69%)                                   | H-19->L+1 (8%), H-18->L+1 (2%), H-1->L+2 (2%)                                   |
| 277.375764586 | 0.022  | HOMO->L+3 (92%)                                                     | H-21->L+1 (2%)                                                                  |
| 272.768497849 | 0.1381 | H-2->L+2 (71%), HOMO->L+4 (17%)                                     | H-1->L+3 (3%)                                                                   |
| 271.537873439 | 0.0312 | H-2->L+2 (20%), HOMO->L+4 (68%)                                     | H-3->L+2 (2%)                                                                   |
| 269.255745243 | 0.0099 | H-23->LUMO (47%), H-21->L+1 (13%), H-1->L+3 (28%)                   |                                                                                 |

**Table S10.** Selected TD-DFT calculated oscillator strengths and compositions of the major electronic transitions of **14**

| Wavelength (nm) | Osc. Strength | Major contributions                     | Minor contributions                                 |
|-----------------|---------------|-----------------------------------------|-----------------------------------------------------|
| 559.293544804   | 0.0961        | HOMO->LUMO (86%)                        | H-1->LUMO (3%), H-1->L+1 (7%)                       |
| 514.73489024    | 0.1251        | H-1->LUMO (60%), HOMO->L+1 (32%)        | HOMO->LUMO (4%)                                     |
| 479.945004499   | 0.0599        | H-2->LUMO (73%)                         | H-1->LUMO (7%), H-1->L+1 (3%), HOMO->L+1 (9%)       |
| 465.091878656   | 0.1189        | H-3->LUMO (55%), H-1->LUMO (12%), HOMO- | H-4->LUMO (7%), H-3->L+1 (2%), H-2->LUMO (5%), H-1- |

|               |        |                                                                    |                                                                                               |
|---------------|--------|--------------------------------------------------------------------|-----------------------------------------------------------------------------------------------|
|               |        | >L+1 (13%)                                                         | >L+1 (3%)                                                                                     |
| 462.903946432 | 0.1459 | H-3->LUMO (13%), H-1->L+1 (16%), HOMO->L+1 (35%)                   | H-5->LUMO (2%), H-4->LUMO (8%), H-4->L+1 (2%), H-3->L+1 (4%), H-2->LUMO (9%), H-1->LUMO (8%)  |
| 448.69786122  | 0.0114 | H-4->LUMO (66%), H-3->LUMO (23%)                                   | H-2->LUMO (2%), H-1->L+1 (3%)                                                                 |
| 430.889667798 | 0.0665 | H-5->LUMO (83%)                                                    | H-1->L+1 (7%)                                                                                 |
| 409.256289857 | 0.0895 | H-2->L+1 (87%)                                                     | H-2->LUMO (2%), H-1->L+1 (3%)                                                                 |
| 404.06789536  | 0.8342 | H-6->LUMO (19%), H-1->L+1 (41%)                                    | H-5->LUMO (7%), H-5->L+1 (2%), H-4->LUMO (8%), H-2->LUMO (3%), H-2->L+1 (5%), HOMO->LUMO (4%) |
| 394.791253024 | 0.1873 | H-8->LUMO (11%), H-6->LUMO (53%)                                   | H-7->LUMO (5%), H-5->LUMO (4%), H-4->L+1 (5%), H-3->L+1 (3%), H-1->L+1 (7%)                   |
| 392.665694417 | 0.1655 | H-7->LUMO (21%), H-3->L+1 (57%)                                    | H-8->LUMO (6%), H-5->L+1 (2%)                                                                 |
| 386.400077951 | 0.0786 | H-14->LUMO (18%), H-8->LUMO (11%), H-7->LUMO (44%), H-3->L+1 (10%) | H-15->LUMO (5%)                                                                               |
| 383.317956445 | 0.4037 | H-4->L+1 (65%)                                                     | H-8->LUMO (5%), H-6->LUMO (8%), H-5->L+1 (6%), H-1->L+1 (3%)                                  |
| 380.611490444 | 0.1962 | H-8->LUMO (18%), H-6->LUMO (12%), H-5->L+1 (32%), H-3->L+1 (14%)   | H-15->LUMO (2%), H-14->LUMO (6%), H-7->LUMO (4%)                                              |
| 373.96450809  | 0.4173 | H-14->LUMO (11%), H-8->LUMO (31%), H-5->L+1 (25%), H-4->L+1 (13%)  | H-15->LUMO (2%), H-6->LUMO (3%), H-3->L+1 (2%)                                                |
| 369.517458982 | 0.2353 | H-14->LUMO (18%), H-7->LUMO (20%), H-5->L+1 (22%)                  | H-15->LUMO (8%), H-9->LUMO (9%), H-8->LUMO (5%), H-4->LUMO (4%), H-4->L+1 (2%)                |
| 359.676809527 | 0.0315 | H-10->LUMO (12%), H-9->LUMO (70%)                                  | H-14->LUMO (5%), H-12->LUMO (3%)                                                              |
| 357.973705824 | 0.0092 | H-11->LUMO (14%), H-10->LUMO (67%)                                 | H-9->LUMO (8%)                                                                                |
| 354.747333368 | 0.0053 | H-11->LUMO (72%), H-10->LUMO (14%)                                 | H-14->LUMO (3%), H-9->LUMO (3%)                                                               |
| 350.961567674 | 0.0027 | H-13->LUMO (10%), H-12->LUMO (79%)                                 | H-15->LUMO (4%)                                                                               |
| 348.946534047 | 0.0017 | H-8->L+1 (19%), H-6->L+1 (52%)                                     | H-14->L+1 (3%), H-13->LUMO (7%), H-7->L+1 (6%)                                                |
| 348.172403853 | 0.0014 | H-13->LUMO (70%), H-12->LUMO (11%)                                 | H-14->LUMO (5%), H-6->L+1 (7%)                                                                |
| 343.180339383 | 0.0291 | H-8->L+1 (14%), H-7->L+1 (42%), H-6->L+1                           | H-14->LUMO (2%), H-14->L+1 (3%), H-9->L+1 (2%)                                                |



|               |        |                                                                       |                                                                                  |
|---------------|--------|-----------------------------------------------------------------------|----------------------------------------------------------------------------------|
|               |        | (27%)                                                                 |                                                                                  |
| 341.009387239 | 0.035  | H-15->LUMO (67%), H-14->LUMO (18%)                                    | H-13->LUMO (4%)                                                                  |
| 336.721417159 | 0.045  | H-8->L+1 (35%), H-7->L+1 (37%)                                        | H-19->LUMO (4%), H-14->L+1 (4%), H-6->L+1 (6%)                                   |
| 334.775733798 | 0.0185 | H-19->LUMO (64%)                                                      | H-25->LUMO (8%), H-24->LUMO (5%), H-18->LUMO (6%), H-8->L+1 (4%)                 |
| 332.575625033 | 0.0033 | H-21->LUMO (33%), H-14->L+1 (23%)                                     | H-25->LUMO (3%), H-19->LUMO (8%), H-15->L+1 (7%), H-13->L+1 (3%), H-8->L+1 (9%)  |
| 331.322500768 | 0.0147 | H-21->LUMO (59%), H-14->L+1 (11%)                                     | H-25->LUMO (3%), H-19->LUMO (6%), H-15->L+1 (3%), H-7->L+1 (2%)                  |
| 328.269726528 | 0.0056 | H-25->LUMO (28%), H-24->LUMO (20%), H-22->LUMO (13%)                  | H-23->LUMO (5%), H-19->LUMO (7%), H-15->L+1 (3%), H-14->L+1 (6%), H-8->L+1 (5%)  |
| 325.503263356 | 0.0003 | H-25->LUMO (11%), H-22->LUMO (74%)                                    | H-24->LUMO (3%), H-9->L+1 (3%)                                                   |
| 322.774635562 | 0.0226 | H-23->LUMO (16%), H-9->L+1 (59%)                                      | H-22->LUMO (4%), H-11->L+1 (3%), H-10->L+1 (8%)                                  |
| 320.571395729 | 0.0345 | H-23->LUMO (36%), H-10->L+1 (15%), H-9->L+1 (26%)                     | H-25->LUMO (7%), H-16->LUMO (4%), H-14->L+1 (3%)                                 |
| 319.893165314 | 0.0053 | H-16->LUMO (47%), H-10->L+1 (36%)                                     | H-23->LUMO (5%)                                                                  |
| 319.695201414 | 0.0066 | H-23->LUMO (19%), H-16->LUMO (46%), H-10->L+1 (22%)                   | H-25->LUMO (3%)                                                                  |
| 318.242750102 | 0.0011 | H-18->LUMO (27%), H-17->LUMO (67%)                                    |                                                                                  |
| 318.161084483 | 0.0001 | H-18->LUMO (63%), H-17->LUMO (29%)                                    | H-19->LUMO (6%)                                                                  |
| 317.558059094 | 0.001  | H-20->LUMO (72%)                                                      | H-26->LUMO (7%), H-24->LUMO (3%), H-11->L+1 (7%)                                 |
| 316.860111458 | 0.0075 | H-26->LUMO (13%), H-24->LUMO (10%), H-20->LUMO (23%), H-11->L+1 (32%) | H-25->LUMO (5%), H-12->L+1 (4%)                                                  |
| 315.328958041 | 0.0049 | H-26->LUMO (30%), H-11->L+1 (42%)                                     | H-31->LUMO (3%), H-24->LUMO (2%), H-14->L+1 (4%), H-13->L+1 (2%), H-12->L+1 (2%) |
| 313.30501355  | 0.0225 | H-26->LUMO (18%), H-12->L+1 (57%)                                     | H-13->L+1 (7%)                                                                   |
| 309.666299546 | 0.0303 | H-14->L+1 (12%), H-13->L+1 (59%)                                      | H-25->LUMO (3%), H-24->LUMO (7%), H-15->L+1 (6%), H-10->L+1 (3%)                 |
| 308.840934144 | 0.1582 | H-24->LUMO (21%), H-                                                  | H-26->LUMO (8%), H-25-                                                           |

|               |        |                                                  |                                                                                 |
|---------------|--------|--------------------------------------------------|---------------------------------------------------------------------------------|
|               |        | 13->L+1 (11%), H-12->L+1 (19%), HOMO->L+2 (10%)  | >LUMO (6%), H-10->L+1 (3%), H-1->L+2 (8%), HOMO->L+3 (3%)                       |
| 307.912861998 | 0.2826 | HOMO->L+2 (73%)                                  | H-15->L+1 (6%), H-12->L+1 (5%)                                                  |
| 306.338035264 | 0.0803 | H-15->L+1 (58%), H-14->L+1 (11%)                 | H-25->LUMO (3%), H-24->LUMO (6%), H-13->L+1 (7%), HOMO->L+2 (5%)                |
| 300.662494877 | 0.0813 | HOMO->L+3 (82%)                                  | H-22->L+1 (3%), H-21->L+1 (3%)                                                  |
| 298.390394966 | 0.013  | H-19->L+1 (76%), H-1->L+2 (10%)                  | H-18->L+1 (6%)                                                                  |
| 297.781230215 | 0.0156 | H-21->L+1 (48%), H-1->L+2 (26%)                  | H-22->L+1 (9%)                                                                  |
| 296.627094627 | 0.191  | H-1->L+2 (12%), HOMO->L+4 (75%)                  |                                                                                 |
| 295.770874811 | 0.058  | H-21->L+1 (23%), H-1->L+2 (28%), HOMO->L+4 (15%) | H-24->LUMO (4%), H-23->L+1 (3%), H-22->L+1 (4%), H-19->L+1 (5%), HOMO->L+3 (3%) |
| 293.217749059 | 0.0125 | H-22->L+1 (66%), H-21->L+1 (17%)                 | HOMO->L+5 (5%)                                                                  |

**Table S11.**  $S_0$  optimized geometry of compound **8** at B3LYP/6-31g (d,p) level of theory.

# Sum of imaginary frequencies= 0

# Total Energy (hartree) = -12146.44981290

| Atom | X       | Y       | Z       | Atom | X       | Y       | Z       |
|------|---------|---------|---------|------|---------|---------|---------|
| Br   | 4.01548 | -2.5388 | -1.2258 | C    | 5.20502 | 4.65151 | -0.5831 |
| Br   | 1.11154 | -4.3969 | -1.2584 | H    | 5.64066 | 5.19044 | -1.4209 |
| Br   | -5.441  | 1.32679 | 0.85774 | C    | 5.63579 | 4.93598 | 0.71836 |
| Br   | -4.6186 | -2.0478 | 1.27417 | C    | -3.5344 | -0.7937 | 0.38817 |
| N    | 0.07313 | 1.99632 | -0.2464 | C    | -2.3209 | 2.54055 | -0.5176 |
| H    | -0.0203 | 0.96686 | -0.0801 | C    | -3.3337 | 3.61224 | -0.6207 |
| N    | 0.67428 | -0.5311 | 0.09132 | C    | -2.7089 | -3.9583 | -0.7743 |
| N    | -1.7614 | 0.22897 | -0.6125 | H    | -3.0928 | -3.3458 | -1.5842 |
| C    | 1.99489 | -0.5483 | -0.1401 | C    | -3.8568 | 0.53222 | 0.23181 |
| C    | 3.64575 | 2.97253 | 0.23088 | C    | -3.2799 | 4.76798 | 0.17634 |
| C    | 2.54811 | 1.9638  | -0.0098 | H    | -2.5001 | 4.8631  | 0.92496 |
| C    | -0.9465 | 2.88034 | -0.5254 | C    | -1.2498 | -4.2383 | 1.12631 |
| C    | 4.29623 | 0.23439 | 0.35441 | H    | -0.5031 | -3.84   | 1.80607 |
| C    | 1.27958 | 2.60235 | -0.2632 | C    | -1.7215 | -5.5357 | 1.29237 |

|   |         |         |         |   |         |         |         |
|---|---------|---------|---------|---|---------|---------|---------|
| C | 2.87193 | 0.59851 | 0.04561 | H | -1.3364 | -6.1441 | 2.10653 |
| C | 0.13608 | -1.7663 | -0.1723 | C | -2.6782 | -6.0751 | 0.42143 |
| C | 5.3657  | 0.55306 | -0.4936 | C | 8.36323 | -0.9228 | 1.35563 |
| H | 5.17539 | 1.08255 | -1.4204 | H | 8.85829 | -0.1286 | 1.92879 |
| C | -0.3159 | 4.15361 | -0.7396 | H | 8.96656 | -1.0994 | 0.46006 |
| H | -0.8316 | 5.06436 | -1.0044 | H | 8.39067 | -1.8295 | 1.96715 |
| C | 4.06623 | 3.26297 | 1.53511 | C | -4.2341 | 5.77274 | 0.03819 |
| H | 3.62251 | 2.72862 | 2.36967 | H | -4.178  | 6.65208 | 0.6747  |
| C | 2.36576 | -1.892  | -0.5944 | C | -3.1558 | -5.2654 | -0.6188 |
| C | 1.2182  | -2.6409 | -0.5962 | H | -3.891  | -5.6649 | -1.3126 |
| C | -2.1779 | -0.9553 | -0.1313 | C | -4.3785 | 3.49982 | -1.5552 |
| C | -1.2533 | -2.0415 | -0.08   | H | -4.434  | 2.61712 | -2.1845 |
| C | 4.22652 | 3.68738 | -0.8247 | C | 6.71844 | 5.95659 | 0.97732 |
| H | 3.90985 | 3.48622 | -1.8445 | H | 6.55972 | 6.477   | 1.92679 |
| C | 5.87742 | -0.8576 | 1.84453 | H | 6.76009 | 6.707   | 0.18246 |
| H | 6.06452 | -1.4135 | 2.75992 | H | 7.70633 | 5.48202 | 1.02953 |
| C | -2.6924 | 1.17074 | -0.3731 | C | -5.2679 | 5.66724 | -0.901  |
| C | 1.03668 | 3.99216 | -0.5608 | C | -3.2005 | -7.4779 | 0.6147  |
| H | 1.79687 | 4.75274 | -0.6418 | H | -2.4558 | -8.1203 | 1.09356 |
| C | -1.7394 | -3.4262 | 0.09096 | H | -3.4829 | -7.9348 | -0.3383 |
| C | 6.94713 | -0.5381 | 1.00047 | H | -4.0927 | -7.4814 | 1.25354 |
| C | 4.57342 | -0.4859 | 1.52474 | C | -5.3181 | 4.51395 | -1.6975 |
| H | 3.75798 | -0.7577 | 2.18892 | H | -6.1064 | 4.41027 | -2.4386 |
| C | 6.66445 | 0.17    | -0.1758 | C | -6.3148 | 6.74642 | -1.0319 |
| H | 7.47424 | 0.41658 | -0.8581 | H | -7.1936 | 6.51887 | -0.4156 |
| C | 5.04506 | 4.22587 | 1.77164 | H | -6.6614 | 6.84437 | -2.065  |
| H | 5.35231 | 4.43243 | 2.79396 | H | -5.9322 | 7.7182  | -0.7071 |

**Table S12.**  $S_0$  optimized geometry of compound 9 at B3LYP/6-31g (d,p) level of theory.

# Sum of imaginary frequencies= 0

# Total Energy (hartree) = -2786.27905167

| Atom | X        | Y        | Z       | Atom | X        | Y        | Z        |
|------|----------|----------|---------|------|----------|----------|----------|
| C    | 2.848672 | -1.05496 | 0.27881 | C    | 6.256174 | 2.621589 | -0.86167 |

|   |          |          |          |   |          |          |          |
|---|----------|----------|----------|---|----------|----------|----------|
| C | 2.427159 | -2.37379 | 0.086464 | C | 6.565997 | 2.111546 | -2.12296 |
| C | 2.096194 | 0.173032 | 0.033529 | C | 5.606353 | 1.379592 | -2.82374 |
| C | 4.221173 | -0.81237 | 0.84136  | C | 4.347435 | 1.160707 | -2.26518 |
| C | 3.395974 | -3.49749 | 0.361797 | C | 1.643651 | 3.649839 | -1.20296 |
| C | 1.138373 | -2.86136 | -0.35135 | C | 2.472046 | 4.677734 | -0.72745 |
| C | 2.65888  | 1.443233 | -0.45008 | C | 2.544574 | 5.903298 | -1.38885 |
| C | 1.597221 | 2.32322  | -0.54259 | C | 1.790261 | 6.125858 | -2.54097 |
| C | 0.407125 | 1.573373 | -0.12065 | C | 0.962462 | 5.111737 | -3.02615 |
| N | 0.779067 | 0.292815 | 0.213237 | C | 0.891226 | 3.887041 | -2.36547 |
| N | -0.01012 | -2.14845 | -0.34663 | H | -0.0245  | -1.13616 | -0.07725 |
| C | -1.07461 | -2.89514 | -0.80418 | H | -1.10593 | -5.00886 | -1.53471 |
| C | -0.53982 | -4.18658 | -1.12357 | H | 1.503603 | -4.98817 | -0.95159 |
| C | 0.805968 | -4.17416 | -0.83158 | H | 0.192578 | 3.824401 | 1.564857 |
| C | -0.94968 | 1.988662 | -0.07717 | H | -0.4345  | 6.194221 | 1.844322 |
| C | -2.41423 | -2.4246  | -0.84777 | H | -3.54135 | 5.715241 | -1.07971 |
| C | -1.97033 | 0.980299 | -0.1832  | H | -2.91269 | 3.347584 | -1.35935 |
| C | -3.35173 | 0.912815 | 0.33117  | H | -2.84416 | -4.87463 | 0.312969 |
| C | -3.8009  | -0.364   | 0.036127 | H | -4.637   | -6.48151 | -0.20987 |
| C | -2.66923 | -1.04189 | -0.61435 | H | -6.25276 | -3.74367 | -3.09463 |
| N | -1.6429  | -0.17996 | -0.76715 | H | -4.45428 | -2.13633 | -2.57408 |
| C | -1.31131 | 3.408839 | 0.080712 | H | 3.408018 | 0.141181 | 2.591347 |
| C | -3.50304 | -3.3905  | -1.10593 | H | 5.599903 | 0.566561 | 3.643499 |
| C | -0.62038 | 4.240189 | 0.978779 | H | 7.55417  | -1.22204 | 0.266214 |
| C | -0.9807  | 5.57367  | 1.138502 | H | 5.371874 | -1.66378 | -0.76951 |
| C | -2.03844 | 6.130717 | 0.408144 | H | 3.120406 | -3.43713 | 2.495949 |
| C | -2.72335 | 5.303919 | -0.49379 | H | 4.653325 | -5.31123 | 2.959335 |
| C | -2.37432 | 3.968366 | -0.6506  | H | 5.42617  | -5.71891 | -1.24294 |
| C | -3.57559 | -4.63255 | -0.45103 | H | 3.896204 | -3.83891 | -1.7046  |
| C | -4.59408 | -5.53523 | -0.74337 | H | 8.018498 | 0.657653 | 3.502162 |
| C | -5.57165 | -5.24129 | -1.70306 | H | 8.814818 | 0.320837 | 1.956918 |
| C | -5.50353 | -3.9996  | -2.34975 | H | 8.5074   | -0.98975 | 3.094644 |
| C | -4.49522 | -3.08848 | -2.05494 | H | 6.727182 | -7.0382  | 0.328884 |
| C | 4.317186 | -0.16673 | 2.082884 | H | 6.70885  | -6.62667 | 2.050417 |

|   |          |          |          |   |          |          |          |
|---|----------|----------|----------|---|----------|----------|----------|
| C | 5.556798 | 0.073767 | 2.675098 | H | 5.506858 | -7.73764 | 1.396253 |
| C | 6.744285 | -0.30556 | 2.041006 | H | -1.62141 | 8.1747   | 0.98433  |
| C | 6.646724 | -0.93334 | 0.790927 | H | -3.26992 | 7.646241 | 1.332552 |
| C | 5.412213 | -1.18864 | 0.203491 | H | -2.80244 | 8.017258 | -0.32695 |
| C | 3.622104 | -3.93737 | 1.6731   | H | -7.5861  | -5.73555 | -2.32019 |
| C | 4.489862 | -4.99556 | 1.931598 | H | -6.35916 | -6.8654  | -2.8942  |
| C | 5.154545 | -5.66123 | 0.892585 | H | -6.86257 | -6.90459 | -1.20341 |
| C | 4.920969 | -5.22516 | -0.41633 | H | -4.18962 | -1.89718 | 2.223854 |
| C | 4.055622 | -4.16219 | -0.67948 | H | -6.3102  | -2.87633 | 3.045859 |
| C | 8.089667 | -0.06277 | 2.682318 | H | -8.42589 | -2.49939 | 1.793346 |
| C | 6.07466  | -6.8241  | 1.180069 | H | -8.39475 | -1.14322 | -0.29115 |
| C | -2.45019 | 7.568682 | 0.607043 | H | -6.26798 | -0.18177 | -1.11436 |
| C | -6.65351 | -6.23678 | -2.04415 | H | -2.50891 | 1.966656 | 2.671495 |
| C | -5.078   | -0.96743 | 0.498384 | H | -3.68506 | 3.583702 | 4.12503  |
| C | -5.11053 | -1.73799 | 1.670862 | H | -5.9248  | 4.450922 | 3.473177 |
| C | -6.30613 | -2.28652 | 2.133506 | H | -6.96712 | 3.681845 | 1.349277 |
| C | -7.49378 | -2.07474 | 1.431753 | H | -5.77899 | 2.077655 | -0.10604 |
| C | -7.47571 | -1.31302 | 0.262968 | H | 4.768317 | 2.785645 | 0.684449 |
| C | -6.27844 | -0.7664  | -0.19897 | H | 6.997452 | 3.190498 | -0.30739 |
| C | -4.0573  | 1.904382 | 1.175591 | H | 7.546853 | 2.284222 | -2.55679 |
| C | 4.022711 | 1.669132 | -0.99708 | H | 5.835054 | 0.983143 | -3.80918 |
| C | -3.48267 | 2.347168 | 2.3791   | H | 3.598847 | 0.598678 | -2.81601 |
| C | -4.14788 | 3.257044 | 3.197999 | H | 3.05443  | 4.516119 | 0.173208 |
| C | -5.40529 | 3.742823 | 2.833878 | H | 3.191616 | 6.685433 | -1.00143 |
| C | -5.98948 | 3.309985 | 1.643365 | H | 1.84731  | 7.079977 | -3.05707 |
| C | -5.32219 | 2.400774 | 0.823083 | H | 0.373975 | 5.272093 | -3.9252  |
| C | 4.995781 | 2.404141 | -0.30557 | H | 0.25494  | 3.097546 | -2.75336 |

**Table S13.**  $S_0$  optimized geometry of compound 10 at B3LYP/6-31g (d,p) level of theory.

# Sum of imaginary frequencies= 0

# Total Energy (hartree) = -3183.20813819

| Atom | X       | Y      | Z       | Atom | X       | Y       | Z       |
|------|---------|--------|---------|------|---------|---------|---------|
| C    | -2.8206 | -1.448 | 0.40597 | C    | -5.9225 | 0.96502 | -2.4541 |

|   |         |         |         |   |         |         |         |
|---|---------|---------|---------|---|---------|---------|---------|
| C | -2.3203 | -2.7321 | 0.1669  | C | -6.8558 | 1.57605 | -1.6263 |
| C | -2.1673 | -0.1665 | 0.15447 | C | -6.5258 | 2.02544 | -0.3541 |
| C | -4.1811 | -1.3162 | 1.0322  | C | -5.2181 | 1.85501 | 0.09777 |
| C | -3.199  | -3.9229 | 0.46269 | C | -2.0133 | 3.36483 | -0.999  |
| C | -1.0251 | -3.1253 | -0.3398 | C | -1.3467 | 3.69367 | -2.1917 |
| C | -2.8368 | 1.07712 | -0.2574 | C | -1.53   | 4.93018 | -2.806  |
| C | -1.8399 | 2.02464 | -0.3905 | C | -2.3949 | 5.84591 | -2.2189 |
| C | -0.5814 | 1.34394 | -0.0624 | C | -3.0765 | 5.55988 | -1.0434 |
| N | -0.8509 | 0.03498 | 0.25533 | C | -2.8799 | 4.31783 | -0.4416 |
| N | 0.07058 | -2.3354 | -0.3863 | F | -8.1226 | 1.73667 | -2.0707 |
| C | 1.15823 | -3.0039 | -0.9059 | F | -2.5772 | 7.04855 | -2.809  |
| C | 0.69678 | -4.3273 | -1.2115 | F | 5.8689  | 4.78332 | 3.30407 |
| C | -0.6292 | -4.4094 | -0.8511 | F | 8.84678 | -2.1853 | 1.2806  |
| C | 0.74609 | 1.84892 | -0.0852 | H | 0.02985 | -1.3266 | -0.1052 |
| C | 2.45778 | -2.4428 | -1.0159 | H | 1.29568 | -5.1057 | -1.6599 |
| C | 1.82472 | 0.91781 | -0.2746 | H | -1.2752 | -5.2682 | -0.944  |
| C | 3.23644 | 0.93974 | 0.15318 | H | 2.5108  | 3.38876 | -1.4551 |
| C | 3.75199 | -0.3004 | -0.1862 | H | 2.98228 | 5.7878  | -1.1402 |
| C | 2.63161 | -1.0475 | -0.7774 | H | 0.08164 | 5.9432  | 2.02111 |
| N | 1.54281 | -0.2567 | -0.8554 | H | -0.3904 | 3.54287 | 1.70457 |
| C | 1.01622 | 3.28764 | 0.09374 | H | 4.3732  | -2.0104 | -2.8544 |
| C | 3.59424 | -3.33   | -1.3419 | H | 6.24906 | -3.4861 | -3.479  |
| C | 1.97808 | 3.94691 | -0.6919 | H | 4.98866 | -6.3354 | -0.5255 |
| C | 2.23868 | 5.30047 | -0.5148 | H | 3.11703 | -4.8608 | 0.10017 |
| C | 1.56031 | 6.04861 | 0.45821 | H | -5.3384 | -2.1856 | -0.5644 |
| C | 0.61066 | 5.38914 | 1.24992 | H | -7.5015 | -1.924  | 0.56914 |
| C | 0.33787 | 4.03749 | 1.07007 | H | -5.5308 | -0.1357 | 3.93707 |
| C | 4.50901 | -2.9575 | -2.3419 | H | -3.3606 | -0.3763 | 2.78633 |
| C | 5.56164 | -3.7951 | -2.6956 | H | -3.7701 | -4.2599 | -1.5863 |
| C | 5.7528  | -5.0295 | -2.0597 | H | -5.1492 | -6.2459 | -1.0962 |
| C | 4.85099 | -5.3936 | -1.0507 | H | -4.2118 | -5.8635 | 3.0749  |
| C | 3.78853 | -4.5659 | -0.6996 | H | -2.8308 | -3.8817 | 2.58332 |
| C | -5.37   | -1.7473 | 0.4262  | H | -8.7988 | -0.5727 | 2.35828 |

|   |         |         |         |   |         |         |         |
|---|---------|---------|---------|---|---------|---------|---------|
| C | -6.594  | -1.595  | 1.06944 | H | -7.9643 | -0.1701 | 3.86765 |
| C | -6.6812 | -1.0213 | 2.34603 | H | -8.3294 | -1.8526 | 3.47554 |
| C | -5.4955 | -0.5881 | 2.94887 | H | -6.1787 | -7.3194 | 2.25384 |
| C | -4.2679 | -0.7242 | 2.30076 | H | -6.3121 | -7.6564 | 0.52109 |
| C | -3.8604 | -4.6114 | -0.562  | H | -4.9703 | -8.3235 | 1.45451 |
| C | -4.6401 | -5.7345 | -0.2828 | H | 2.87006 | 7.7705  | 0.405   |
| C | -4.7827 | -6.2097 | 1.02582 | H | 1.61214 | 7.85403 | 1.6495  |
| C | -4.1171 | -5.5193 | 2.04778 | H | 1.19982 | 8.1177  | -0.0461 |
| C | -3.335  | -4.3999 | 1.77317 | H | 7.22522 | -6.5521 | -1.618  |
| C | -8.0116 | -0.8932 | 3.04841 | H | 6.56668 | -6.6385 | -3.2524 |
| C | -5.6068 | -7.4388 | 1.32816 | H | 7.73766 | -5.3828 | -2.8456 |
| C | 1.82814 | 7.52347 | 0.62942 | H | 6.11739 | 0.08677 | -1.4885 |
| C | 6.88225 | -5.9461 | -2.4617 | H | 8.37803 | -0.7319 | -0.815  |
| C | 5.09738 | -0.8133 | 0.18093 | H | 6.6669  | -2.6673 | 2.60049 |
| C | 6.23089 | -0.5089 | -0.5879 | H | 4.40482 | -1.8381 | 1.94403 |
| C | 7.49784 | -0.9646 | -0.2254 | H | 5.53028 | 2.30096 | -0.4362 |
| C | 7.62323 | -1.7376 | 0.92156 | H | 6.70119 | 3.98494 | 0.98013 |
| C | 6.52685 | -2.0643 | 1.7099  | H | 3.66739 | 3.58735 | 3.97645 |
| C | 5.26878 | -1.5978 | 1.3324  | H | 2.49675 | 1.88938 | 2.57401 |
| C | 3.9261  | 1.97011 | 0.96341 | H | -3.8764 | 0.33495 | -2.6228 |
| C | -4.2454 | 1.24096 | -0.7041 | H | -6.2173 | 0.6338  | -3.444  |
| C | 5.1194  | 2.56986 | 0.53048 | H | -7.2845 | 2.49457 | 0.26275 |
| C | 5.78085 | 3.51647 | 1.31171 | H | -4.9544 | 2.18014 | 1.09843 |
| C | 5.2366  | 3.86402 | 2.54089 | H | -0.6819 | 2.96602 | -2.6457 |
| C | 4.05872 | 3.29354 | 3.00857 | H | -1.0207 | 5.18808 | -3.7281 |
| C | 3.41276 | 2.34806 | 2.21605 | H | -3.7425 | 6.3007  | -0.6145 |
| C | -4.6197 | 0.8029  | -1.9847 | H | -3.3993 | 4.08854 | 0.4821  |

**Table S14.**  $S_0$  optimized geometry of compound **11** at B3LYP/6-31g (d,p) level of theory.

# Sum of imaginary frequencies= 0

# Total Energy (hartree) = -3155.25238532

| Atom | X      | Y       | Z       | Atom | X       | Y       | Z       |
|------|--------|---------|---------|------|---------|---------|---------|
| C    | -2.777 | -1.6737 | 0.49094 | C    | -6.6284 | 1.66407 | -0.0585 |

|   |         |         |         |   |         |         |         |
|---|---------|---------|---------|---|---------|---------|---------|
| C | -2.2356 | -2.9354 | 0.22263 | C | -5.3019 | 1.53566 | 0.33669 |
| C | -2.1818 | -0.365  | 0.23386 | C | -2.205  | 3.17757 | -0.8888 |
| C | -4.1237 | -1.6    | 1.15385 | C | -1.5823 | 3.54234 | -2.0958 |
| C | -3.0584 | -4.162  | 0.5322  | C | -1.8332 | 4.772   | -2.6904 |
| C | -0.9427 | -3.2731 | -0.3286 | C | -2.7258 | 5.67447 | -2.088  |
| C | -2.9124 | 0.85691 | -0.1329 | C | -3.3597 | 5.32099 | -0.8863 |
| C | -1.9573 | 1.84344 | -0.2965 | C | -3.0979 | 4.08802 | -0.3001 |
| C | -0.6632 | 1.20816 | -0.0276 | C | -8.3923 | 1.35883 | -1.7453 |
| N | -0.8715 | -0.1107 | 0.28715 | N | -9.505  | 1.45183 | -2.0727 |
| N | 0.11888 | -2.4418 | -0.4073 | C | -2.9827 | 6.94783 | -2.6934 |
| C | 1.21309 | -3.0654 | -0.9698 | N | -3.1866 | 7.98342 | -3.1835 |
| C | 0.79164 | -4.4048 | -1.2686 | C | 5.7767  | 4.95993 | 3.20355 |
| C | -0.5155 | -4.5394 | -0.8626 | N | 6.29674 | 5.77825 | 3.8471  |
| C | 0.64211 | 1.76735 | -0.0948 | C | 9.00415 | -2.0791 | 0.96008 |
| C | 2.48167 | -2.4536 | -1.1251 | N | 10.0745 | -2.4579 | 1.21473 |
| C | 1.74625 | 0.88078 | -0.3345 | H | 0.05124 | -1.4386 | -0.1171 |
| C | 3.16988 | 0.95531 | 0.03841 | H | 1.40322 | -5.1563 | -1.7448 |
| C | 3.71814 | -0.2658 | -0.3246 | H | -1.132  | -5.4211 | -0.939  |
| C | 2.60673 | -1.0513 | -0.8774 | H | 2.28833 | 3.38558 | -1.5182 |
| N | 1.49024 | -0.3012 | -0.9134 | H | 2.6797  | 5.79771 | -1.1967 |
| C | 0.86358 | 3.21183 | 0.09068 | H | -0.1045 | 5.8159  | 2.0712  |
| C | 3.64345 | -3.2827 | -1.504  | H | -0.4988 | 3.40225 | 1.74897 |
| C | 1.77076 | 3.91454 | -0.7242 | H | 4.29937 | -1.9131 | -3.0321 |
| C | 1.98582 | 5.27482 | -0.5437 | H | 6.22423 | -3.2855 | -3.7353 |
| C | 1.3207  | 5.9878  | 0.46599 | H | 5.20609 | -6.2279 | -0.7794 |
| C | 0.42051 | 5.28732 | 1.27998 | H | 3.28435 | -4.8583 | -0.0743 |
| C | 0.19106 | 3.9276  | 1.09633 | H | -5.2848 | -2.5076 | -0.4192 |
| C | 4.50439 | -2.8533 | -2.5299 | H | -7.4285 | -2.3329 | 0.76724 |
| C | 5.58483 | -3.6328 | -2.9279 | H | -5.4448 | -0.4956 | 4.10129 |
| C | 5.86294 | -4.8598 | -2.3085 | H | -3.2964 | -0.6424 | 2.89626 |
| C | 5.0087  | -5.2845 | -1.2818 | H | -3.6766 | -4.5026 | -1.5035 |
| C | 3.91736 | -4.5163 | -0.8867 | H | -4.9605 | -6.5452 | -0.9937 |
| C | -5.3095 | -2.0738 | 0.57372 | H | -3.9155 | -6.1649 | 3.15209 |



|   |         |         |         |   |         |         |         |
|---|---------|---------|---------|---|---------|---------|---------|
| C | -6.5224 | -1.9721 | 1.24725 | H | -2.6301 | -4.1248 | 2.64203 |
| C | -6.6    | -1.4109 | 2.53044 | H | -7.8792 | -0.6181 | 4.08652 |
| C | -5.4167 | -0.9374 | 3.10824 | H | -8.1802 | -2.3139 | 3.69814 |
| C | -4.2014 | -1.0204 | 2.42907 | H | -8.7339 | -1.0541 | 2.59744 |
| C | -3.722  | -4.8665 | -0.4805 | H | -5.7867 | -7.7221 | 2.40384 |
| C | -4.4478 | -6.022  | -0.1903 | H | -6.0605 | -7.9823 | 0.67409 |
| C | -4.5319 | -6.5151 | 1.11726 | H | -4.6259 | -8.6503 | 1.45527 |
| C | -3.8649 | -5.8078 | 2.1264  | H | 2.53322 | 7.6081  | 1.21689 |
| C | -3.1364 | -4.655  | 1.84105 | H | 0.79681 | 7.92854 | 1.26592 |
| C | -7.9163 | -1.3405 | 3.26641 | H | 1.67086 | 7.98938 | -0.2732 |
| C | -5.2945 | -7.7809 | 1.42828 | H | 7.96186 | -5.3478 | -2.1789 |
| C | 1.58918 | 7.45651 | 0.67918 | H | 6.92057 | -6.7394 | -2.4844 |
| C | 7.063   | -5.6796 | -2.7133 | H | 7.26953 | -5.5859 | -3.7835 |
| C | 5.08891 | -0.7373 | -0.0054 | H | 6.03952 | 0.28333 | -1.6474 |
| C | 6.1941  | -0.35   | -0.7797 | H | 8.32446 | -0.4761 | -1.0741 |
| C | 7.47865 | -0.7804 | -0.4668 | H | 6.74706 | -2.659  | 2.28185 |
| C | 7.68444 | -1.62   | 0.63938 | H | 4.46725 | -1.8783 | 1.71285 |
| C | 6.58824 | -2.0144 | 1.424   | H | 5.38952 | 2.41355 | -0.6068 |
| C | 5.30997 | -1.5752 | 1.10001 | H | 6.52752 | 4.11774 | 0.77344 |
| C | 3.84408 | 2.00193 | 0.83801 | H | 3.58702 | 3.56605 | 3.86604 |
| C | -4.3422 | 0.97738 | -0.5207 | H | 2.46628 | 1.84538 | 2.48821 |
| C | 4.99938 | 2.65384 | 0.37545 | H | -4.0144 | 0.13556 | -2.4765 |
| C | 5.63924 | 3.61839 | 1.14545 | H | -6.3742 | 0.36084 | -3.1988 |
| C | 5.13066 | 3.95709 | 2.40926 | H | -7.3638 | 2.09041 | 0.61529 |
| C | 3.97816 | 3.31038 | 2.88713 | H | -5.0081 | 1.84569 | 1.3333  |
| C | 3.35067 | 2.34654 | 2.10931 | H | -0.9003 | 2.84596 | -2.5721 |
| C | -4.749  | 0.55858 | -1.7985 | H | -1.3478 | 5.04017 | -3.6228 |
| C | -6.0716 | 0.68399 | -2.2084 | H | -4.0483 | 6.01629 | -0.4183 |
| C | -7.0235 | 1.23721 | -1.3367 | H | -3.5813 | 3.83029 | 0.6352  |

**Table S15.**  $S_0$  optimized geometry of compound **12** at B3LYP/6-31g (d,p) level of theory.

# Sum of imaginary frequencies= 0

# Total Energy (hartree) = -3244.37887087

| Atom | X       | Y       | Z       | Atom | X       | Y       | Z       |
|------|---------|---------|---------|------|---------|---------|---------|
| C    | -2.8014 | -1.7438 | 0.5665  | C    | -3.4099 | 5.25714 | -0.7872 |
| C    | -2.2674 | -3.0047 | 0.27976 | C    | -3.1398 | 4.02248 | -0.213  |
| C    | -2.2127 | -0.4348 | 0.3014  | O    | -8.4328 | 1.36625 | -1.4045 |
| C    | -4.1313 | -1.6772 | 1.26491 | O    | -3.129  | 6.85718 | -2.4802 |
| C    | -3.0866 | -4.2316 | 0.59882 | O    | 5.87647 | 4.82828 | 3.03017 |
| C    | -0.9882 | -3.3439 | -0.3003 | O    | 8.90702 | -2.1494 | 0.93367 |
| C    | -2.9511 | 0.7886  | -0.0515 | C    | -8.921  | 0.98036 | -2.6777 |
| C    | -1.9983 | 1.77228 | -0.2358 | C    | -2.5469 | 7.26995 | -3.7046 |
| C    | -0.6975 | 1.13441 | 0.00991 | C    | 5.43526 | 5.21191 | 4.32124 |
| N    | -0.9    | -0.1878 | 0.32438 | C    | 10.0358 | -1.7781 | 0.16144 |
| N    | 0.07413 | -2.5129 | -0.3952 | H    | 0.01003 | -1.508  | -0.1009 |
| C    | 1.15573 | -3.1341 | -0.9804 | H    | 1.33082 | -5.221  | -1.7666 |
| C    | 0.7282  | -4.4702 | -1.2778 | H    | -1.1904 | -5.488  | -0.9171 |
| C    | -0.573  | -4.6062 | -0.8482 | H    | 2.25787 | 3.29542 | -1.506  |
| C    | 0.60774 | 1.68844 | -0.0755 | H    | 2.66873 | 5.70494 | -1.1907 |
| C    | 2.42705 | -2.5226 | -1.1504 | H    | -0.1116 | 5.74975 | 2.08057 |
| C    | 1.70981 | 0.79976 | -0.3295 | H    | -0.5174 | 3.33699 | 1.76687 |
| C    | 3.14161 | 0.8692  | 0.02687 | H    | 4.22574 | -1.9947 | -3.0782 |
| C    | 3.68461 | -0.3455 | -0.3588 | H    | 6.11392 | -3.3949 | -3.8293 |
| C    | 2.56184 | -1.1263 | -0.9018 | H    | 5.11773 | -6.3279 | -0.8571 |
| N    | 1.44075 | -0.3763 | -0.9121 | H    | 3.23411 | -4.9298 | -0.1072 |
| C    | 0.83755 | 3.13469 | 0.10599 | H    | -5.3359 | -2.5448 | -0.2964 |
| C    | 3.57604 | -3.3634 | -1.5496 | H    | -7.4462 | -2.4003 | 0.95387 |
| C    | 1.74379 | 3.8305  | -0.7141 | H    | -5.3686 | -0.6449 | 4.2741  |
| C    | 1.96979 | 5.18958 | -0.5366 | H    | -3.2532 | -0.7687 | 3.00691 |
| C    | 1.31251 | 5.90817 | 0.47279 | H    | -3.7477 | -4.5565 | -1.4245 |
| C    | 0.41143 | 5.21585 | 1.29124 | H    | -5.0229 | -6.6035 | -0.904  |
| C    | 0.17552 | 3.85635 | 1.11303 | H    | -3.8921 | -6.2539 | 3.22172 |
| C    | 4.42129 | -2.9445 | -2.591  | H    | -2.6152 | -4.2111 | 2.6988  |
| C    | 5.48171 | -3.7393 | -3.0148 | H    | -8.4989 | -0.6014 | 3.05789 |
| C    | 5.74993 | -4.9745 | -2.4106 | H    | -7.7118 | -1.1992 | 4.52292 |
| C    | 4.91845 | -5.3845 | -1.3594 | H    | -8.4569 | -2.3327 | 3.38514 |

|   |         |         |         |   |         |         |         |
|---|---------|---------|---------|---|---------|---------|---------|
| C | 3.84917 | -4.6001 | -0.9381 | H | -5.8068 | -7.7916 | 2.48779 |
| C | -5.3335 | -2.1348 | 0.70682 | H | -6.0687 | -8.0689 | 0.75899 |
| C | -6.5268 | -2.0486 | 1.41581 | H | -4.6355 | -8.7228 | 1.55532 |
| C | -6.5689 | -1.5134 | 2.71131 | H | 1.6771  | 7.90762 | -0.2704 |
| C | -5.3692 | -1.0605 | 3.26919 | H | 2.53699 | 7.52534 | 1.21979 |
| C | -4.1726 | -1.1305 | 2.55524 | H | 0.80131 | 7.85517 | 1.26783 |
| C | -3.7728 | -4.9286 | -0.4038 | H | 7.3564  | -6.3799 | -2.0544 |
| C | -4.4934 | -6.0861 | -0.1075 | H | 6.53335 | -6.6042 | -3.5979 |
| C | -4.5507 | -6.5889 | 1.19742 | H | 7.65756 | -5.2591 | -3.3925 |
| C | -3.8622 | -5.8894 | 2.1976  | H | 5.9855  | 0.16514 | -1.7398 |
| C | -3.1388 | -4.7354 | 1.90515 | H | 8.26799 | -0.5637 | -1.2135 |
| C | -7.8748 | -1.4082 | 3.46181 | H | 6.79593 | -2.6857 | 2.22209 |
| C | -5.3079 | -7.8565 | 1.51571 | H | 4.48997 | -1.9285 | 1.69052 |
| C | 1.59161 | 7.37627 | 0.68299 | H | 5.36788 | 2.31268 | -0.6464 |
| C | 6.88622 | -5.8468 | -2.8865 | H | 6.53244 | 4.02206 | 0.72257 |
| C | 5.06196 | -0.8181 | -0.0665 | H | 3.6228  | 3.48453 | 3.83975 |
| C | 6.15222 | -0.4536 | -0.8627 | H | 2.48562 | 1.78747 | 2.48634 |
| C | 7.45295 | -0.872  | -0.5694 | H | -4.1326 | 0.08294 | -2.3654 |
| C | 7.68117 | -1.6806 | 0.548   | H | -6.4859 | 0.3128  | -3.0292 |
| C | 6.60108 | -2.0606 | 1.35676 | H | -7.3943 | 2.0316  | 0.80434 |
| C | 5.31629 | -1.6342 | 1.05043 | H | -5.0163 | 1.77649 | 1.47251 |
| C | 3.83223 | 1.9154  | 0.81417 | H | -0.9808 | 2.80406 | -2.5208 |
| C | -4.3912 | 0.91188 | -0.3995 | H | -1.4376 | 4.97968 | -3.5537 |
| C | 4.98741 | 2.56131 | 0.33821 | H | -4.0903 | 5.95954 | -0.317  |
| C | 5.64404 | 3.52236 | 1.09497 | H | -3.615  | 3.76063 | 0.726   |
| C | 5.16252 | 3.86972 | 2.36379 | H | -9.9878 | 1.21007 | -2.6752 |
| C | 4.01663 | 3.23934 | 2.86055 | H | -8.4344 | 1.54016 | -3.487  |
| C | 3.36945 | 2.27505 | 2.08676 | H | -8.7852 | -0.0943 | -2.8576 |
| C | -4.8427 | 0.50505 | -1.6601 | H | -1.4521 | 7.32063 | -3.6387 |
| C | -6.1809 | 0.63607 | -2.0408 | H | -2.9396 | 8.26819 | -3.905  |
| C | -7.1009 | 1.18925 | -1.1448 | H | -2.8224 | 6.60255 | -4.5317 |
| C | -6.6671 | 1.60463 | 0.12148 | H | 4.42464 | 5.64013 | 4.29556 |
| C | -5.3336 | 1.46757 | 0.48193 | H | 5.44543 | 4.36751 | 5.02271 |

|   |         |         |         |   |         |         |         |
|---|---------|---------|---------|---|---------|---------|---------|
| C | -2.2551 | 3.11072 | -0.8159 | H | 6.13729 | 5.97232 | 4.66735 |
| C | -1.6588 | 3.49169 | -2.0248 | H | 9.95835 | -2.1398 | -0.8724 |
| C | -1.9194 | 4.72884 | -2.6161 | H | 10.8974 | -2.2462 | 0.64017 |
| C | -2.8002 | 5.62067 | -1.9951 | H | 10.1788 | -0.6898 | 0.14768 |

**Table S16.** S<sub>0</sub> optimized geometry of compound **13** at B3LYP/6-31g (d,p) level of theory.

# Sum of imaginary frequencies= 1

# Total Energy (hartree) = -3710.53555458

| Atom | X        | Y        | Z        | Atom | X        | Y        | Z        |
|------|----------|----------|----------|------|----------|----------|----------|
| C    | -2.62094 | -2.58046 | 0.839499 | C    | 7.576258 | 6.266523 | 3.016253 |
| C    | -1.99527 | -3.77857 | 0.478072 | C    | 6.853682 | 7.067935 | 3.901781 |
| C    | -2.19876 | -1.21724 | 0.532288 | C    | 5.493069 | 6.822635 | 4.094372 |
| C    | -3.86446 | -2.64911 | 1.6819   | C    | 4.861565 | 5.787016 | 3.407672 |
| C    | -2.64223 | -5.08472 | 0.869027 | C    | -4.31505 | 7.188264 | -1.3434  |
| C    | -0.76023 | -3.97904 | -0.24494 | C    | -4.76921 | 8.392622 | -1.87814 |
| C    | -3.09011 | -0.07352 | 0.284138 | C    | -5.03575 | 8.500368 | -3.24405 |
| C    | -2.26679 | 1.007139 | 0.028372 | C    | -4.84474 | 7.390625 | -4.06891 |
| C    | -0.89069 | 0.503142 | 0.119714 | C    | -4.39316 | 6.185875 | -3.53303 |
| N    | -0.92308 | -0.8348  | 0.425817 | C    | -9.3328  | 0.125902 | -1.96331 |
| N    | 0.193793 | -3.04195 | -0.44122 | C    | -10.7053 | 0.112849 | -2.20567 |
| C    | 1.259844 | -3.54294 | -1.15682 | C    | -11.6    | -0.17068 | -1.1725  |
| C    | 0.939773 | -4.91418 | -1.43055 | C    | -11.1079 | -0.44233 | 0.105138 |
| C    | -0.28286 | -5.18771 | -0.86026 | C    | -9.73513 | -0.43148 | 0.346243 |
| C    | 0.332606 | 1.191552 | -0.10017 | H    | 0.061337 | -2.05246 | -0.12087 |
| C    | 2.432467 | -2.80181 | -1.45971 | H    | 1.556467 | -5.59384 | -1.99922 |
| C    | 1.480278 | 0.427752 | -0.50485 | H    | -0.81121 | -6.12803 | -0.87724 |
| C    | 2.929085 | 0.647399 | -0.3261  | H    | 1.589775 | 3.008135 | -1.67897 |
| C    | 3.543909 | -0.50629 | -0.78524 | H    | 1.782253 | 5.438842 | -1.32158 |
| C    | 2.45104  | -1.39953 | -1.20051 | H    | -0.49684 | 5.087436 | 2.299989 |
| N    | 1.267262 | -0.76967 | -1.06816 | H    | -0.69382 | 2.653907 | 1.938134 |
| C    | 0.429114 | 2.649311 | 0.101371 | H    | 3.929686 | -2.06255 | -3.56645 |
| C    | 3.60778  | -3.51159 | -2.00761 | H    | 5.858147 | -3.24077 | -4.55709 |
| C    | 1.135404 | 3.462193 | -0.80424 | H    | 5.522209 | -6.3016  | -1.56581 |

|   |          |          |          |   |          |          |          |
|---|----------|----------|----------|---|----------|----------|----------|
| C | 1.238765 | 4.831765 | -0.60193 | H | 3.598617 | -5.12425 | -0.57552 |
| C | 0.656041 | 5.446041 | 0.517529 | H | -5.14038 | -3.65475 | 0.26635  |
| C | -0.04157 | 4.636754 | 1.421844 | H | -7.09893 | -3.71685 | 1.746244 |
| C | -0.15994 | 3.264999 | 1.217548 | H | -4.86189 | -1.70215 | 4.806435 |
| C | 4.279202 | -2.99104 | -3.12644 | H | -2.9027  | -1.61831 | 3.309263 |
| C | 5.362836 | -3.66145 | -3.68576 | H | -3.49672 | -5.46907 | -1.0697  |
| C | 5.827866 | -4.8672  | -3.14558 | H | -4.49452 | -7.63425 | -0.43448 |
| C | 5.168428 | -5.37878 | -2.01891 | H | -2.93323 | -7.18409 | 3.538275 |
| C | 4.077436 | -4.72009 | -1.4614  | H | -1.93272 | -5.02324 | 2.900573 |
| C | -5.06581 | -3.238   | 1.263901 | H | -8.26146 | -2.74839 | 3.758062 |
| C | -6.17524 | -3.26846 | 2.1035   | H | -7.31421 | -1.99396 | 5.051288 |
| C | -6.12686 | -2.72807 | 3.395774 | H | -7.33368 | -3.74924 | 4.874097 |
| C | -4.92899 | -2.13565 | 3.811325 | H | -4.84663 | -8.86802 | 2.977617 |
| C | -3.82043 | -2.08844 | 2.967465 | H | -5.13792 | -9.23689 | 1.27109  |
| C | -3.3664  | -5.84414 | -0.05822 | H | -3.60958 | -9.69142 | 2.029787 |
| C | -3.93041 | -7.06854 | 0.303071 | H | 1.833254 | 7.243681 | 0.760188 |
| C | -3.78784 | -7.57674 | 1.598997 | H | 0.312389 | 7.247196 | 1.666026 |
| C | -3.05927 | -6.81524 | 2.523052 | H | 0.306374 | 7.492281 | -0.08544 |
| C | -2.49138 | -5.59485 | 2.165581 | H | 7.656156 | -6.01414 | -2.99453 |
| C | -7.32163 | -2.80428 | 4.31615  | H | 6.648148 | -6.44576 | -4.37544 |
| C | -4.37943 | -8.91087 | 1.988342 | H | 7.583933 | -4.94828 | -4.40662 |
| C | 0.782283 | 6.934658 | 0.729616 | H | 5.61254  | 0.303011 | -2.3781  |
| C | 6.992179 | -5.60375 | -3.76182 | H | 8.009001 | -0.18275 | -2.10147 |
| C | 4.986673 | -0.83464 | -0.66085 | H | 7.114978 | -2.59574 | 1.33863  |
| C | 5.939379 | -0.32607 | -1.55554 | H | 4.725116 | -2.06108 | 1.088961 |
| C | 7.293387 | -0.61533 | -1.40851 | H | 4.856971 | 2.342104 | -1.26595 |
| C | 7.751526 | -1.42913 | -0.36043 | H | 5.980469 | 4.162687 | -0.05958 |
| C | 6.795876 | -1.94292 | 0.531629 | H | 3.647194 | 3.277399 | 3.437534 |
| C | 5.44308  | -1.6516  | 0.384665 | H | 2.515455 | 1.466217 | 2.221096 |
| C | 3.59855  | 1.761445 | 0.382382 | H | -4.39294 | -0.98649 | -1.88411 |
| C | -4.56064 | -0.10647 | 0.073393 | H | -6.81908 | -1.03137 | -2.31034 |
| C | 4.596069 | 2.534574 | -0.23104 | H | -7.51577 | 0.771665 | 1.526692 |
| C | 5.234378 | 3.564086 | 0.454755 | H | -5.09591 | 0.76087  | 1.968614 |

|   |          |          |          |   |          |          |          |
|---|----------|----------|----------|---|----------|----------|----------|
| C | 4.902156 | 3.866975 | 1.784413 | H | -3.93765 | 2.831362 | 1.194991 |
| C | 3.905717 | 3.090209 | 2.399564 | H | -4.75648 | 4.943691 | 0.245903 |
| C | 3.270316 | 2.060103 | 1.71531  | H | -2.39281 | 4.268993 | -3.27812 |
| C | -5.0779  | -0.60556 | -1.13219 | H | -1.61894 | 2.130138 | -2.34578 |
| C | -6.44813 | -0.6191  | -1.37651 | H | 9.582939 | -1.9228  | -2.31317 |
| C | -7.35923 | -0.13299 | -0.42461 | H | 11.98743 | -2.41491 | -2.04722 |
| C | -6.83922 | 0.365793 | 0.780557 | H | 12.99401 | -2.54697 | 0.224204 |
| C | -5.46869 | 0.380328 | 1.023266 | H | 11.56475 | -2.15872 | 2.223335 |
| C | -2.71498 | 2.316096 | -0.50076 | H | 9.169591 | -1.62702 | 1.953434 |
| C | -3.60015 | 3.139084 | 0.211302 | H | 7.522695 | 4.594007 | 1.667249 |
| C | -4.05165 | 4.343109 | -0.32141 | H | 8.637591 | 6.442397 | 2.864933 |
| C | -3.63747 | 4.777755 | -1.59041 | H | 7.345847 | 7.875031 | 4.436485 |
| C | -2.75116 | 3.952703 | -2.303   | H | 4.918788 | 7.445183 | 4.774824 |
| C | -2.30156 | 2.748897 | -1.7716  | H | 3.796981 | 5.621636 | 3.543824 |
| C | 5.575613 | 4.970201 | 2.514029 | H | -4.08507 | 7.124195 | -0.28408 |
| C | 9.195221 | -1.73691 | -0.20007 | H | -4.90651 | 9.251681 | -1.22735 |
| C | -4.11892 | 6.061191 | -2.16005 | H | -5.3889  | 9.438898 | -3.66113 |
| C | -8.82133 | -0.14653 | -0.68287 | H | -5.05748 | 7.459438 | -5.13207 |
| C | 10.01772 | -1.95511 | -1.31858 | H | -4.27533 | 5.321485 | -4.17957 |
| C | 11.37319 | -2.24299 | -1.16776 | H | -8.64757 | 0.375623 | -2.76781 |
| C | 11.93809 | -2.32202 | 0.106187 | H | -11.077  | 0.334719 | -3.20209 |
| C | 11.13419 | -2.10877 | 1.227191 | H | -12.6696 | -0.17939 | -1.36094 |
| C | 9.779374 | -1.81862 | 1.075619 | H | -11.7943 | -0.67208 | 0.915339 |
| C | 6.944907 | 5.229439 | 2.331732 | H | -9.36164 | -0.67011 | 1.337641 |

**Table S17.** S<sub>0</sub> optimized geometry of compound **14** at B3LYP/6-31g (d,p) level of theory.

# Sum of imaginary frequencies= 1

# Total Energy (hartree) = -4069.28918546

| Atom | X       | Y       | Z       | Atom | X       | Y       | Z       |
|------|---------|---------|---------|------|---------|---------|---------|
| C    | 2.87974 | -1.0966 | 0.30935 | C    | -3.4829 | 2.39293 | 2.38634 |
| C    | 2.46105 | -2.4127 | 0.08948 | C    | -4.3128 | 3.27063 | 3.01722 |
| C    | 2.13087 | 0.13424 | 0.07564 | S    | -5.795  | 3.48849 | 2.13929 |
| C    | 4.24851 | -0.8695 | 0.88756 | C    | -5.2814 | 2.37242 | 0.91667 |

|   |         |         |         |   |         |         |         |
|---|---------|---------|---------|---|---------|---------|---------|
| C | 3.43162 | -3.5394 | 0.34709 | C | 2.59857 | 4.65386 | -0.7929 |
| C | 1.17611 | -2.8954 | -0.3634 | C | 2.48931 | 5.76441 | -1.5775 |
| C | 2.69451 | 1.4084  | -0.3874 | S | 1.27634 | 5.55998 | -2.8018 |
| C | 1.62746 | 2.27848 | -0.5122 | C | 0.9206  | 3.96092 | -2.242  |
| C | 0.43489 | 1.52582 | -0.1083 | C | 5.10209 | 2.32847 | -0.0856 |
| N | 0.80741 | 0.2458  | 0.22359 | C | 6.26892 | 2.49348 | -0.7734 |
| N | 0.02485 | -2.1875 | -0.3487 | S | 6.15179 | 1.86057 | -2.385  |
| C | -1.0351 | -2.9301 | -0.8239 | C | 4.50927 | 1.3749  | -2.1189 |
| C | -0.4929 | -4.2132 | -1.1672 | H | 0.0113  | -1.1763 | -0.0689 |
| C | 0.85123 | -4.2007 | -0.8706 | H | -1.0531 | -5.0291 | -1.5985 |
| C | -0.9233 | 1.94473 | -0.0587 | H | 1.55317 | -5.0087 | -1.0046 |
| C | -2.3762 | -2.465  | -0.8629 | H | 0.24594 | 3.73618 | 1.61145 |
| C | -1.9452 | 0.94113 | -0.1752 | H | -0.3549 | 6.10538 | 1.9432  |
| C | -3.3317 | 0.8711  | 0.32623 | H | -3.5037 | 5.71018 | -0.9485 |
| C | -3.7741 | -0.4098 | 0.02983 | H | -2.9017 | 3.34292 | -1.2807 |
| C | -2.6345 | -1.0842 | -0.6112 | H | -2.7632 | -4.9553 | 0.22348 |
| N | -1.6117 | -0.2202 | -0.7561 | H | -4.5663 | -6.5501 | -0.2991 |
| C | -1.2748 | 3.36397 | 0.13216 | H | -6.2663 | -3.7291 | -3.0527 |
| C | -3.4648 | -3.4284 | -1.128  | H | -4.4543 | -2.1371 | -2.5393 |
| C | -0.5667 | 4.17149 | 1.03903 | H | 3.42317 | 0.00643 | 2.67187 |
| C | -0.9116 | 5.50546 | 1.22786 | H | 5.60768 | 0.37314 | 3.76196 |
| C | -1.9689 | 6.08797 | 0.51683 | H | 7.58461 | -1.271  | 0.3245  |
| C | -2.6779 | 5.28213 | -0.3859 | H | 5.40995 | -1.6571 | -0.7484 |
| C | -2.3434 | 3.94656 | -0.5728 | H | 3.13161 | -3.5345 | 2.47924 |
| C | -3.5176 | -4.6895 | -0.5096 | H | 4.66391 | -5.4158 | 2.91197 |
| C | -4.5434 | -5.5856 | -0.8    | H | 5.48083 | -5.7181 | -1.2909 |
| C | -5.5522 | -5.262  | -1.7152 | H | 3.95119 | -3.8304 | -1.722  |
| C | -5.4991 | -4.0035 | -2.3331 | H | 8.0049  | 0.32943 | 3.7335  |
| C | -4.4829 | -3.1014 | -2.0427 | H | 8.7787  | 0.36123 | 2.14225 |
| C | 4.33576 | -0.2792 | 2.15635 | H | 8.60242 | -1.1654 | 3.00349 |
| C | 5.57164 | -0.0723 | 2.77062 | H | 6.63804 | -7.189  | 0.2055  |
| C | 6.76277 | -0.4283 | 2.13116 | H | 6.88345 | -6.6019 | 1.85616 |
| C | 6.67396 | -0.9985 | 0.85245 | H | 5.57853 | -7.7344 | 1.51094 |

|   |         |         |         |   |         |         |         |
|---|---------|---------|---------|---|---------|---------|---------|
| C | 5.44399 | -1.2212 | 0.24313 | H | -1.9857 | 7.92152 | 1.66594 |
| C | 3.64497 | -4.0115 | 1.64979 | H | -3.4017 | 7.70587 | 0.6231  |
| C | 4.51209 | -5.0737 | 1.89089 | H | -1.848  | 8.16133 | -0.0775 |
| C | 5.19023 | -5.7113 | 0.8423  | H | -7.6092 | -5.8959 | -1.5314 |
| C | 4.96794 | -5.2445 | -0.4574 | H | -6.878  | -6.283  | -3.0874 |
| C | 4.10277 | -4.1766 | -0.7032 | H | -6.4542 | -7.2282 | -1.6509 |
| C | 8.10482 | -0.2121 | 2.78877 | H | -4.2833 | -2.3979 | 2.03277 |
| C | 6.12209 | -6.8684 | 1.1147  | H | -6.7712 | -3.1533 | 2.4563  |
| C | -2.3219 | 7.54394 | 0.69602 | H | -6.5074 | -0.0253 | -0.8543 |
| C | -6.6786 | -6.2211 | -2.0125 | H | -2.51   | 2.10941 | 2.76904 |
| C | -5.046  | -1.0235 | 0.46123 | H | -4.149  | 3.79782 | 3.94641 |
| C | -4.0299 | 1.86256 | 1.16405 | H | -5.9212 | 2.17341 | 0.07086 |
| C | 4.0747  | 1.67979 | -0.8532 | H | 3.29735 | 4.57268 | 0.03004 |
| C | 1.69018 | 3.60163 | -1.1616 | H | 3.04556 | 6.68876 | -1.5117 |
| C | -5.1439 | -2.0219 | 1.49259 | H | 0.1661  | 3.36797 | -2.7381 |
| C | -6.4226 | -2.4313 | 1.73137 | H | 4.96759 | 2.63055 | 0.94596 |
| S | -7.5555 | -1.6165 | 0.69897 | H | 7.19205 | 2.93918 | -0.4308 |
| C | -6.2809 | -0.7121 | -0.0516 | H | 3.94588 | 0.90369 | -2.9119 |

---

### References:

1. G. M. Sheldrick, *Acta Crystallogr.*, 2008, **64**, 112–122.
2. A. Altomare, G. Cascarano, C. Giacovazzo, A. Guagliardi, M. C. Burla, G. Polidori and M. Camalli, *J. Appl. Crystallogr.*, 1994, **27**, 435–436.
3. O. Treutler and R. Ahlrichs, *J. Chem. Phys.*, 1995, **102**, 346–354.
4. A. D. Becke, *J. Chem. Phys.*, 1993, **98**, 1372–1377.
5. C. Xiii, F. Component, L. Radom, W. J. Hehre and J. A. Pople, *Orbital XIII.*, 1971, **4064**, 2371–2381.
6. J. Tomasi, B. Mennucci and R. Cammi, *Chem. Rev.*, 2005, **105**, 2999–3093.
7. R. Bauernschmitt and R. Ahlrichs, *Chem. Phys. Lett.*, 1996, **256**, 454–464.
